# Supplementary material for: Comprehensive meta-analysis of QTL and gene expression studies identify candidate genes associated with Aspergillus flavus resistance in maize
Source: Front Plant Sci. 2023 Jul 18;14:1214907. doi: 10.3389/fpls.2023.1214907 (PMC10392829; doi:10.3389/fpls.2023.1214907)
Supplement: Supplementary file 2 [file Table_1.xlsx]

## Sheet: Sheet1
Supplementary Table S1: Details of the QTLs used in the meta-analysis for Aspergillus flavus resistance in maize (Refrerences in bold red font represent the studies where the QTLs were used for meta-analysis)
study	Resistant parent	Susceptible parent	Population type (RILs)	Population size	Type of marker	QTL study ID	marker linked to QTL	# QTLs	ID	QTL ID	Trait	Default			Chr*	LOD	R2 (%PVE)	Pos (cM)	InfCI	SupCI	Used for MQTL analysis	CI
Alwala et al. 2008	Mp313E	SC212m	F2:3	142	AFLP	qAlw	E81CAA1-E71MCAA3	8	1	qAlw.04001	SD	null	null	null	4	2	10	41.5	38	45	Yes	7
						qAlw	E81MCAA2-E81MCAA4		2	qAlw.04002	SD	null	null	null	4	2	10	70	66	74	Yes	8
						qAlw	E71MCAG7-E81MCAG12		3	qAlw.05001	SD	null	null	null	5	2	9	75	70	80	Yes	10
						qAlw	E71MCAG11		4	qAlw.02001	SD	null	null	null	2	1.5	6	25.5	21	30	Yes	9
						qAlw	E71MCAG6-E81MCAT7		5	qAlw.03001	SD	null	null	null	3	2.3	10	9	6	12	Yes	6
						qAlw	E81MCAA4-E71MCAA2		6	qAlw.04003	SD	null	null	null	4	1.6	6	77	74	80	Yes	6
						qAlw	E82MCTC6		7	qAlw.05002	SD	null	null	null	5	1.4	10	7	4	10	Yes	6
						qAlw	MTN1803		8	qAlw.10001	SD	null	null	null	10	1.4	6	17.5	15	20	Yes	5
Belo 2007	CML 161	B73o2	S5	146	SSR	qBel	umc1917	12	10	qBel.01001	SD	null	null	null	1	3	5.8	81.7	62.4511	100.949	No	38.4979
						qBel	umc2096		11	qBel.01002	SD	null	null	null	1	3	15.4	81.7	74.4504	88.9496	No	14.4992
						qBel	bnlg2204		12	qBel.01003	SD	null	null	null	1	3	11	69	58.8506	79.1494	No	20.2989
						qBel	umc1805		13	qBel.06001	SD	null	null	null	6	3	10	89.7	78.5356	100.864	No	22.3288
						qBel	umc1912		14	qBel.06002	SD	null	null	null	6	3	2	89.7	33.8781	145.522	No	111.644
						qBel	umc2393		15	qBel.09001	SD	null	null	null	9	3	4	3.2	0	31.111	No	31.111
						qBel	bnlg1724		16	qBel.09002	SD	null	null	null	9	3	8	3.2	0	17.1555	No	17.1555
						qBel	umc1917		17	qBel.01004	SD	null	null	null	1	3	6	81.7	63.0927	100.307	No	37.2146
						qBel	umc2112		18	qBel.01005	SD	null	null	null	1	3	4	98.7	70.789	126.611	No	55.8219
						qBel	txp196L		19	qBel.03002	SD	null	null	null	3	3	12	136.7	127.396	146.004	No	18.6073
						qBel	txp218L		20	qBel.03003	SD	null	null	null	3	3	5	136.7	114.371	159.029	No	44.6575
						qBel	umc2142		21	qBel.07001	SD	null	null	null	7	3	11.5	81.1	71.3918	90.8082	No	19.4163
Brooks et al. 2005	Mp313E	B73	F2:3	210	SSR	qBrk	bnlg371	9	23	qBrk.02002	SD	null	null	null	2	3	18.4	35	21.2836	48.7164	No	27.4327
						qBrk	bnlg2291		24	qBrk.04004	SD	null	null	null	4	3	16	22	6.22619	37.7738	No	31.5476
						qBrk	bnlg371		25	qBrk.02003	SD	null	null	null	2	3	18.3	35	21.2087	48.7913	No	27.5826
						qBrk	bnlg2291		26	qBrk.04005	SD	null	null	null	4	3	8.2	22	-8.77816	52.7782	No	61.5563
						qBrk	bnlg371		27	qBrk.02004	SD	null	null	null	2	3	7.1	35	0	70.5466	No	70.5466
						qBrk	bnlg2291		28	qBrk.04006	SD	null	null	null	4	3	14.8	22	4.94723	39.0528	No	34.1055
						qBrk	bnlg371		29	qBrk.02005	SD	null	null	null	2	3	12.5	35	14.8095	55.1905	No	40.381
						qBrk	bnlg371		30	qBrk.02006	SD	null	null	null	2	3	22.9	35	23.979	46.021	No	22.042
						qBrk	bnlg2291		31	qBrk.04007	SD	null	null	null	4	3	20.1	22	9.44373	34.5563	No	25.1125
Dhakal et al. 2016	Mp715	B73	F2:3	191	SSR	qDhk	bmc1689	22	33	qDhk.01006	SD	null	null	null	1	2.58	1	136.15	130.5	141.8	Yes	11.3
						qDhk	dupssr26		34	qDhk.01007	SD	null	null	null	1	3.92	5.2	115.85	110.1	121.6	Yes	11.5
						qDhk	umc1689		35	qDhk.01008	SD	null	null	null	1	2.67	7.3	139.2	134.7	143.7	Yes	9
						qDhk	umc2223		36	qDhk.01009	SD	null	null	null	1	3.33	1	287.3	277.5	297.1	Yes	19.6
						qDhk	bmc1520		37	qDhk.02007	SD	null	null	null	2	2.4	1	260.9	237.9	283.9	Yes	46
						qDhk	bmc2277		38	qDhk.02008	SD	null	null	null	2	2.51	3.7	62.75	51.1	74.4	Yes	23.3
						qDhk	umc1729		39	qDhk.03004	SD	null	null	null	3	2.59	2	104.45	93.1	115.8	Yes	22.7
						qDhk	bmc1536		40	qDhk.03005	SD	null	null	null	3	2.5	9.2	241.15	227.5	254.8	Yes	27.3
						qDhk	umc2150		41	qDhk.04008	SD	null	null	null	4	2.85	3.6	38.9	29	48.8	Yes	19.8
						qDhk	umc1509		42	qDhk.04009	SD	null	null	null	4	4.71	1.6	82.8	77.2	88.4	Yes	11.2
						qDhk	umc2150		43	qDhk.04010	SD	null	null	null	4	2.58	8.7	32.05	19.3	44.8	Yes	25.5
						qDhk	umc1088		44	qDhk.04011	SD	null	null	null	4	4.72	10	129.7	125.4	134	Yes	8.6
						qDhk	bmc1208		45	qDhk.05003	SD	null	null	null	5	3	7.6	111.3	97.7	124.9	Yes	27.2
						qDhk	umc1799		46	qDhk.07002	SD	null	null	null	7	3.33	1	336.5	329	344	Yes	15
						qDhk	bmc1782		47	qDhk.08001	SD	null	null	null	8	4.88	1	100.55	91	110.1	Yes	19.1
						qDhk	phi233376		48	qDhk.08002	SD	null	null	null	8	2.82	2.9	261.25	255.7	266.8	Yes	11.1
						qDhk	bmc1782		49	qDhk.08003	SD	null	null	null	8	2.5	1	99.5	86.9	112.1	Yes	25.2
						qDhk	bmc1626		50	qDhk.09003	SD	null	null	null	9	2.55	3.5	34.6	16.5	52.7	Yes	36.2
						qDhk	umc1381		51	qDhk.10002	SD	null	null	null	10	2.68	1	117.45	114.5	120.4	Yes	5.9
						qDhk	umc1827		52	qDhk.10003	SD	null	null	null	10	3.44	9.1	137.35	122.9	151.8	Yes	28.9
						qDhk	bmc1518		53	qDhk.10004	SD	null	null	null	10	2.91	4.8	251.4	245	257.8	Yes	12.8
						qDhk	bmc1074		54	qDhk.10005	SD	null	null	null	10	6.44	6	173.5	165.2	181.8	Yes	16.6
Mayfield et al. 2011	CML161	B73o2	RIL F5:6	146	SSR	qMfd	Mayfield_8	4	56	qMfd.01010	SD	null	null	null	1	3	8	70.3	63.3223	77.2777	No	13.9555
						qMfd	Mayfield_2		57	qMfd.08004	SD	null	null	null	8	3	9	15.3	9.09756	21.5024	No	12.4049
						qMfd	Mayfield_8		58	qMfd.03006	SD	null	null	null	3	3	9	68.9	62.6976	75.1024	No	12.4049
						qMfd	Mayfield_15		59	qMfd.04012	SD	null	null	null	4	3	8	109.1	86.4116	131.788	No	45.3767
Mideros et al. 2013	CML322	B73	F2:S5	185	SSR	qMid	Mideros_2007_if_silk_PZA01438	35	61	qMid.05004	SD	null	null	null	5	3	6	7	0.4	13.3	Yes	12.9
						qMid	Mideros_2007_if_silk_PHM13122		62	qMid.05005	SD	null	null	null	5	3	9	15	14.3	21.5	Yes	7.2
						qMid	Mideros_2009_sp_dvk_PZA02454		63	qMid.08005	SD	null	null	null	8	3	16	42	41.5	46.4	Yes	4.9
						qMid	Mideros_2009_if_silk_PZA00139		64	qMid.04013	SD	null	null	null	4	3	12	44	42.4	47.7	Yes	5.3
						qMid	Mideros_2007_if_silk_PHM1962		65	qMid.02009	SD	null	null	null	2	3	31	57	54.2	58.9	Yes	4.7
						qMid	Mideros_2010_afla_PZA03270		66	qMid.04014	SD	null	null	null	4	3	7	56	54.4	56.9	Yes	2.5
						qMid	Mideros_2008_sp_silk_PZA00908		67	qMid.08006	SD	null	null	null	8	3	12	58	54.8	59.9	Yes	5.1
						qMid	Mideros_2009_if_silk_PZA00104		68	qMid.04015	SD	null	null	null	4	3	17	58	56.1	58.3	Yes	2.2
						qMid	Mideros_2007_if_silk_PZA03102		69	qMid.06003	SD	null	null	null	6	3	6	58	56.6	59	Yes	2.4
						qMid	Mideros_2009_sp_silk_PZA00104		70	qMid.04016	SD	null	null	null	4	3	20	58	57.4	58.1	Yes	0.7
						qMid	Mideros_2010_ic_silk_PZA01072		71	qMid.08007	SD	null	null	null	8	3	12	62	58.8	62.3	Yes	3.5
						qMid	Mideros_2007_sp_dvk_PZA00986		72	qMid.07003	SD	null	null	null	7	3	20	64	63.3	69.9	Yes	6.6
						qMid	Mideros_2009_afla_PZA02292		73	qMid.01011	SD	null	null	null	1	3	7	66	64.3	66.6	Yes	2.3
						qMid	Mideros_2008_sp_silk_PZB02155		74	qMid.08008	SD	null	null	null	8	3	17	67	65.6	67.4	Yes	1.8
						qMid	Mideros_2010_ic_silk_PZA01787		75	qMid.08009	SD	null	null	null	8	3	11	68	67.4	69.5	Yes	2.1
						qMid	Mideros_2007_if_silk_PZA01672		76	qMid.06004	SD	null	null	null	6	3	53	70	69.1	75.5	Yes	6.4
						qMid	Mideros_2010_afla_PZA03607		77	qMid.10006	SD	null	null	null	10	3	13	75	71.9	80.3	Yes	8.4
						qMid	Mideros_2007_sp_dvk_PZA01902		78	qMid.02010	SD	null	null	null	2	3	13	76	72.2	79.8	Yes	7.6
						qMid	Mideros_2008_afla_PHM4748		79	qMid.06005	SD	null	null	null	6	3	10	79	77.3	83.3	Yes	6
						qMid	Mideros_2009_afla_PZA00130		80	qMid.10007	SD	null	null	null	10	3	8	81	79.4	82.2	Yes	2.8
						qMid	Mideros_2007_sp_dvk_PZA02465		81	qMid.02011	SD	null	null	null	2	3	12	83	79.8	83.4	Yes	3.6
						qMid	Mideros_2009_afla_PZA02402		82	qMid.03007	SD	null	null	null	3	3	7	81	80.6	82.1	Yes	1.5
						qMid	Mideros_2007_sp_dvk_PZA02722		83	qMid.07004	SD	null	null	null	7	3	12	81	81	85.7	Yes	4.7
						qMid	Mideros_2008_afla_PHM3637		84	qMid.04017	SD	null	null	null	4	3	12	93	90	100.4	Yes	10.4
						qMid	Mideros_2010_afla_an1		85	qMid.01012	SD	null	null	null	1	3	9	95	94	99	Yes	5
						qMid	Mideros_2009_ic_silk_PZA00344		86	qMid.04018	SD	null	null	null	4	3	8	101	100.5	102.6	Yes	2.1
						qMid	Mideros_2010_ic_silk_PZA00344		87	qMid.04019	SD	null	null	null	4	3	8	101	100.5	102.9	Yes	2.4
						qMid	Mideros_2009_ic_silk_PZA01810		88	qMid.04020	SD	null	null	null	4	3	9	107	102.6	111.3	Yes	8.7
						qMid	Mideros_2007_if_silk_PZA00910		89	qMid.06006	SD	null	null	null	6	3	30	107	104	107.6	Yes	3.6
						qMid	Mideros_2009_ic_silk_PZA00521		90	qMid.04021	SD	null	null	null	4	3	7	115	111.5	123.8	Yes	12.3
						qMid	Mideros_2010_ic_silk_PZA00878		91	qMid.04022	SD	null	null	null	4	3	12	113	111.5	115.2	Yes	3.7
						qMid	Mideros_2009_afla_PZA00505		92	qMid.07005	SD	null	null	null	7	3	6	113	112.2	114.6	Yes	2.4
						qMid	Mideros_2010_ic_silk_PZA00694		93	qMid.04023	SD	null	null	null	4	3	12	118	116.1	118.6	Yes	2.5
						qMid	Mideros_2008_if_silk_PHM12706		94	qMid.01013	SD	null	null	null	1	3	12	124	122.3	124.6	Yes	2.3
						qMid	Mideros_2008_if_silk_PHM5484		95	qMid.01014	SD	null	null	null	1	3	11	130	128.2	133.7	Yes	5.5
Ogunola et al. 2021	CLM69	Va35	F2:3	233	SNP	qOgl	Ognula_1	24	97	qOgl.01015	SD	null	null	null	1	4.33	4.8	63.9	49.3256	78.4744	Yes	29.1488
						qOgl	Ognula_1.1		98	qOgl.01016	SD	null	null	null	1	5.47	5.9	193	181.143	204.857	Yes	23.7143
						qOgl	Ognula_4.1		99	qOgl.01017	SD	null	null	null	1	5.01	5.7	193	180.727	205.273	Yes	24.5463
						qOgl	Ognula_2		100	qOgl.02012	SD	null	null	null	2	3.48	5	61.6	47.6086	75.5914	Yes	27.9828
						qOgl	Ognula_1.2		101	qOgl.02013	SD	null	null	null	2	3.27	3.7	32.2	13.2927	51.1073	Yes	37.8146
						qOgl	Ognula_1.3		102	qOgl.02014	SD	null	null	null	2	1.24	3.3	130.9	109.701	152.099	Yes	42.3982
						qOgl	Ognula_4.2		103	qOgl.02015	SD	null	null	null	2	3.17	1.8	90.9	52.035	129.765	Yes	77.7301
						qOgl	Ognula_3		104	qOgl.03008	SD	null	null	null	3	3.87	6.4	39.9	28.9692	50.8308	Yes	21.8616
						qOgl	Ognula_1.4		105	qOgl.03009	SD	null	null	null	3	4.55	9.3	77.5	69.9777	85.0223	Yes	15.0445
						qOgl	Ognula_1.5		106	qOgl.03010	SD	null	null	null	3	8.99	4.1	185.1	168.037	202.163	Yes	34.1254
						qOgl	Ognula_3.1		107	qOgl.03011	SD	null	null	null	3	5.37	8.4	87	78.6718	95.3282	Yes	16.6564
						qOgl	Ognula_4.3		108	qOgl.03012	SD	null	null	null	3	3.47	7.6	43.4	34.1951	52.6049	Yes	18.4098
						qOgl	Ognula_4.4		109	qOgl.03013	SD	null	null	null	3	3.81	5	98.8	84.8086	112.791	Yes	27.9828
						qOgl	Ognula_4.5		110	qOgl.03014	SD	null	null	null	3	3.98	4	185.1	167.611	202.589	Yes	34.9785
						qOgl	Ognula_1.6		111	qOgl.04024	SD	null	null	null	4	12.81	12.6	112.7	107.148	118.252	Yes	11.1043
						qOgl	Ognula_3.2		112	qOgl.04025	SD	null	null	null	4	4.79	6.6	128.8	118.2	139.4	Yes	21.1991
						qOgl	Ognula_4.6		113	qOgl.04026	SD	null	null	null	4	8.14	8.1	121.8	113.163	130.437	Yes	17.2734
						qOgl	Ognula_1.7		114	qOgl.05006	SD	null	null	null	5	2.08	2.2	19.2	0	50.9987	Yes	50.9987
						qOgl	Ognula_2.1		115	qOgl.05007	SD	null	null	null	5	4.96	6.5	151	140.237	161.763	Yes	21.5253
						qOgl	Ognula_4.7		116	qOgl.05008	SD	null	null	null	5	3.29	3.4	46.9	26.3244	67.4756	Yes	41.1512
						qOgl	Ognula_1.8		117	qOgl.07006	SD	null	null	null	7	4.34	8.1	67.3	58.6633	75.9367	Yes	17.2734
						qOgl	Ognula_3.3		118	qOgl.07007	SD	null	null	null	7	8.12	6.8	49.4	39.1122	59.6878	Yes	20.5756
						qOgl	Ognula_1.9		119	qOgl.09004	SD	null	null	null	9	5.13	4.1	47	29.9373	64.0627	Yes	34.1254
						qOgl	Ognula_2.2		120	qOgl.09005	SD	null	null	null	9	2.57	4.9	87.9	73.623	102.177	Yes	28.5539
Smith et al. 2019	Mp715	Va35	F2:3	250	SNP & SSR	q19Smt	Smith_MS_2015_1	39	128	q19Smt.01019	SD	null	null	null	1	3	6.94	19.8	13.5	25.3	Yes	11.8
						q19Smt	Smith_MS_2016_1		129	q19Smt.01020	SD	null	null	null	1	3	7.96	59.9	48.9	67.2	Yes	18.3
						q19Smt	Smith_MS_2017_1		130	q19Smt.01021	SD	null	null	null	1	3	6.33	60.3	50.9	65.5	Yes	14.6
						q19Smt	Smith_TX_2017_1		131	q19Smt.01022	SD	null	null	null	1	3	6.68	49	42.2	50.7	Yes	8.5
						q19Smt	Smith_TX_2017_2		132	q19Smt.01023	SD	null	null	null	1	3	3.65	72.6	65.4	84.8	Yes	19.4
						q19Smt	Smith_TX_2017_3		133	q19Smt.01024	SD	null	null	null	1	3	2.78	169.6	160.8	172.5	Yes	11.7
						q19Smt	Smith_Comb_1		134	q19Smt.01025	SD	null	null	null	1	3	9.89	59.9	50.1	64.4	Yes	14.3
						q19Smt	Smith_MS_2016_2		135	q19Smt.02016	SD	null	null	null	2	3	6.45	10.9	2.6	14.9	Yes	12.3
						q19Smt	Smith_MS_2016_3		136	q19Smt.02017	SD	null	null	null	2	3	2.18	114.7	101.3	140.6	Yes	39.3
						q19Smt	Smith_MS_2015_2		137	q19Smt.03015	SD	null	null	null	3	3	5.46	89.3	78.8	93.4	Yes	14.6
						q19Smt	Smith_MS_2016_4		138	q19Smt.03016	SD	null	null	null	3	3	2.95	115.7	110.4	120.2	Yes	9.8
						q19Smt	Smith_MS_2017_2		139	q19Smt.03017	SD	null	null	null	3	3	3.04	137.5	133.5	141.9	Yes	8.4
						q19Smt	Smith_Comb_2		140	q19Smt.03018	SD	null	null	null	3	3	2.44	63.9	58.6	76.8	Yes	18.2
						q19Smt	Smith_MS_2017_3		141	q19Smt.04027	SD	null	null	null	4	3	1.14	18.3	15.3	30.4	Yes	15.1
						q19Smt	Smith_MS_2017_4		142	q19Smt.04028	SD	null	null	null	4	3	7.52	95.5	90.4	99.9	Yes	9.5
						q19Smt	Smith_MS_2017_5		143	q19Smt.04029	SD	null	null	null	4	3	3.77	109.9	102.7	112.8	Yes	10.1
						q19Smt	Smith_Comb_3		144	q19Smt.04030	SD	null	null	null	4	3	6.8	92.2	87.1	100.1	Yes	13
						q19Smt	Smith_MS_2016_5		145	q19Smt.05010	SD	null	null	null	5	3	5.54	29.1	10.3	34.5	Yes	24.2
						q19Smt	Smith_TX_2017_4		146	q19Smt.05011	SD	null	null	null	5	3	6.7	63.2	55.6	68.7	Yes	13.1
						q19Smt	Smith_MS_2015_3		147	q19Smt.06007	SD	null	null	null	6	3	17.92	67.8	63.6	70.7	Yes	7.1
						q19Smt	Smith_MS_2016_6		148	q19Smt.06008	SD	null	null	null	6	3	5.99	49.6	47.1	51.2	Yes	4.1
						q19Smt	Smith_MS_2017_6		149	q19Smt.06009	SD	null	null	null	6	3	13.73	65.2	59	68	Yes	9
						q19Smt	Smith_Comb_4		150	q19Smt.06010	SD	null	null	null	6	3	14.33	66.2	59.3	68.8	Yes	9.5
						q19Smt	Smith_MS_2015_4		151	q19Smt.07008	SD	null	null	null	7	3	8.59	59	53.9	60.5	Yes	6.6
						q19Smt	Smith_MS_2016_7		152	q19Smt.07009	SD	null	null	null	7	3	6.67	57.4	46.7	64.6	Yes	17.9
						q19Smt	Smith_MS_2017_7		153	q19Smt.07010	SD	null	null	null	7	3	7.71	58.2	40.8	62.9	Yes	22.1
						q19Smt	Smith_TX_2017_5		154	q19Smt.07011	SD	null	null	null	7	3	0.0094	12.6	0	25.8	Yes	25.8
						q19Smt	Smith_TX_2017_6		155	q19Smt.07012	SD	null	null	null	7	3	8.6	59	45	68	Yes	23
						q19Smt	Smith_TX_2017_7		156	q19Smt.07013	SD	null	null	null	7	3	1.45	103.8	100.5	110.2	Yes	9.7
						q19Smt	Smith_Comb_5		157	q19Smt.07014	SD	null	null	null	7	3	15.35	58.8	55.3	62.5	Yes	7.2
						q19Smt	Smith_Comb_6		158	q19Smt.07015	SD	null	null	null	7	3	0.0039	103.8	100.5	109.7	Yes	9.2
						q19Smt	Smith_MS_2017_8		159	q19Smt.08011	SD	null	null	null	8	3	3.72	57.6	39.8	67.4	Yes	27.6
						q19Smt	Smith_Comb_7		160	q19Smt.08012	SD	null	null	null	8	3	2.59	55.1	39.7	65.2	Yes	25.5
						q19Smt	Smith_MS_2015_5		161	q19Smt.10009	SD	null	null	null	10	3	2.44	37.5	22.4	41.8	Yes	19.4
						q19Smt	Smith_MS_2015_6		162	q19Smt.10010	SD	null	null	null	10	3	5.11	60	46.3	66.3	Yes	20
						q19Smt	Smith_MS_2016_8		163	q19Smt.10011	SD	null	null	null	10	3	6.94	47.3	41.6	50.6	Yes	9
						q19Smt	Smith_MS_2016_9		164	q19Smt.10012	SD	null	null	null	10	3	2.05	97.6	86.3	108.1	Yes	21.8
						q19Smt	Smith_MS_2017_9		165	q19Smt.10013	SD	null	null	null	10	3	6.14	62.7	59.4	66.1	Yes	6.7
						q19Smt	Smith_Comb_8		166	q19Smt.10014	SD	null	null	null	10	3	7.16	62.7	57.6	68.3	Yes	10.7
Smith et al. 2021	Mp717	PHW79	F2:3	279	SNP & SSR	q21SmtA	MS_2015_1	39	168	q21SmtA.01026	SD	null	null	null	1	3	3.9	8.5	0	23.4802	Yes	23.4802
						q21SmtA	MS_2015_2		169	q21SmtA.01027	SD	null	null	null	1	3	3.9	87.9	72.9198	102.88	Yes	29.9605
						q21SmtA	MS_2017_1		170	q21SmtA.01028	SD	null	null	null	1	3	5.9	8.5	0	18.4022	Yes	18.4022
						q21SmtA	MS_2017_2		171	q21SmtA.01029	SD	null	null	null	1	3	9.8	33.1	27.1385	39.0615	Yes	11.923
						q21SmtA	MS_2017_3		172	q21SmtA.01030	SD	null	null	null	1	3	4.1	94	79.7505	108.249	Yes	28.499
						q21SmtA	TX_2017_1		173	q21SmtA.01031	SD	null	null	null	1	3	9.6	37.6	31.5143	43.6857	Yes	12.1714
						q21SmtA	TX_2017_2		174	q21SmtA.01032	SD	null	null	null	1	3	8.7	92.9	86.1847	99.6153	Yes	13.4306
						q21SmtA	MS_2018_1		175	q21SmtA.01033	SD	null	null	null	1	3	2.7	191.4	169.762	213.038	Yes	43.2763
						q21SmtA	combined_1		176	q21SmtA.01034	SD	null	null	null	1	3	7.7	24.5	16.9126	32.0874	Yes	15.1748
						q21SmtA	combined_2		177	q21SmtA.01035	SD	null	null	null	1	3	8.6	92.9	86.1066	99.6934	Yes	13.5867
						q21SmtA	MS_2015_3		178	q21SmtA.02018	SD	null	null	null	2	3	7.5	4	0	11.7897	Yes	11.7897
						q21SmtA	MS_2015_4		179	q21SmtA.02019	SD	null	null	null	2	3	2.8	99.9	79.0347	120.765	Yes	41.7307
						q21SmtA	MS_2017_4		180	q21SmtA.02020	SD	null	null	null	2	3	7.3	57.3	49.2969	65.3031	Yes	16.0063
						q21SmtA	MS_2018_2		181	q21SmtA.02021	SD	null	null	null	2	3	8.5	101.9	95.0267	108.773	Yes	13.7466
						q21SmtA	MS_2018_3		182	q21SmtA.02022	SD	null	null	null	2	3	4.6	133.7	120.999	146.401	Yes	25.4013
						q21SmtA	combined_3		183	q21SmtA.02023	SD	null	null	null	2	3	6.8	5.6	0	14.1916	Yes	14.1916
						q21SmtA	combined_4		184	q21SmtA.02024	SD	null	null	null	2	3	3.5	50.9	34.2077	67.5923	Yes	33.3845
						q21SmtA	MS_2018_4		185	q21SmtA.03019	SD	null	null	null	3	3	2.3	98.2	72.7987	123.601	Yes	50.8026
						q21SmtA	MS_2017_5		186	q21SmtA.04031	SD	null	null	null	4	3	4.2	117.5	103.59	131.41	Yes	27.8204
						q21SmtA	TX_2017_3		187	q21SmtA.04032	SD	null	null	null	4	3	2.9	128.9	108.754	149.046	Yes	40.2917
						q21SmtA	MS_2017_6		188	q21SmtA.05012	SD	null	null	null	5	3	2.3	116.3	90.8987	141.701	Yes	50.8026
						q21SmtA	MS_2018_5		189	q21SmtA.05013	SD	null	null	null	5	3	5.9	36.8	26.8978	46.7022	Yes	19.8044
						q21SmtA	MS_2018_6		190	q21SmtA.05014	SD	null	null	null	5	3	3	112.3	92.8257	131.774	Yes	38.9486
						q21SmtA	MS_2015_5		191	q21SmtA.06011	SD	null	null	null	6	3	5.1	45.1	33.6445	56.5555	Yes	22.911
						q21SmtA	MS_2015_6		192	q21SmtA.06012	SD	null	null	null	6	3	2.2	97.8	71.2441	124.356	Yes	53.1118
						q21SmtA	MS_2017_7		193	q21SmtA.06013	SD	null	null	null	6	3	5.3	9.1	0	20.1232	Yes	20.1232
						q21SmtA	MS_2018_7		194	q21SmtA.06014	SD	null	null	null	6	3	5.2	52	40.7648	63.2352	Yes	22.4704
						q21SmtA	combined_5		195	q21SmtA.06015	SD	null	null	null	6	3	5.7	8.4	0	18.6496	Yes	18.6496
						q21SmtA	combined_6		196	q21SmtA.06016	SD	null	null	null	6	3	5.3	66.8	55.7768	77.8232	Yes	22.0464
						q21SmtA	MS_2015_7		197	q21SmtA.07016	SD	null	null	null	7	3	5.6	26.9	16.4673	37.3327	Yes	20.8653
						q21SmtA	MS_2017_8		198	q21SmtA.07017	SD	null	null	null	7	3	6.9	42.5	34.0329	50.9671	Yes	16.9342
						q21SmtA	TX_2017_4		199	q21SmtA.07018	SD	null	null	null	7	3	4.6	27.1	14.3994	39.8006	Yes	25.4013
						q21SmtA	combined_7		200	q21SmtA.07019	SD	null	null	null	7	3	8.7	27.1	20.3847	33.8153	Yes	13.4306
						q21SmtA	MS_2017_9		201	q21SmtA.08013	SD	null	null	null	8	3	2.4	59.3	34.9571	83.6429	Yes	48.6858
						q21SmtA	combined_8		202	q21SmtA.08014	SD	null	null	null	8	3	4.8	15.2	3.02855	27.3714	Yes	24.3429
						q21SmtA	MS_2015_8		203	q21SmtA.09007	SD	null	null	null	9	3	7.9	43.8	36.4047	51.1953	Yes	14.7906
						q21SmtA	MS_2017_10		204	q21SmtA.09008	SD	null	null	null	9	3	2.7	104.1	82.4619	125.738	Yes	43.2763
						q21SmtA	MS_2015_9		205	q21SmtA.10015	SD	null	null	null	10	3	6.2	87.2	77.7769	96.6231	Yes	18.8461
						q21SmtA	TX_2017_5		206	q21SmtA.10016	SD	null	null	null	10	3	4	39.9	25.2943	54.5057	Yes	29.2115
Smith et al. 2021	Mp717	Va35	F2:3	328	SNP & SSR	q21SmtB	MS_2016_1	61	208	q21SmtB.01036	SD	null	null	null	1	3	9.5	106	100.769	111.231	Yes	10.462
						q21SmtB	MS_2016_2		209	q21SmtB.01037	SD	null	null	null	1	3	7.2	150.4	143.498	157.302	Yes	13.804
						q21SmtB	MS_2016_3		210	q21SmtB.02025	SD	null	null	null	2	3	3	141.3	124.735	157.865	Yes	33.13
						q21SmtB	MS_2016_4		211	q21SmtB.03020	SD	null	null	null	3	3	3.7	91.9	78.469	105.331	Yes	26.862
						q21SmtB	MS_2016_5		212	q21SmtB.06017	SD	null	null	null	6	3	3.5	34.4	20.201	48.599	Yes	28.398
						q21SmtB	MS_2016_6		213	q21SmtB.07020	SD	null	null	null	7	3	2.5	25.7	5.822	45.578	Yes	39.756
						q21SmtB	MS_2016_7		214	q21SmtB.10017	SD	null	null	null	10	3	3.3	33.8	18.741	48.859	Yes	30.118
						q21SmtB	TX_2016_1		215	q21SmtB.01038	SD	null	null	null	1	3	7.5	83.7	77.074	90.326	Yes	13.252
						q21SmtB	TX_2016_2		216	q21SmtB.01039	SD	null	null	null	1	3	11.2	125.1	120.663	129.537	Yes	8.874
						q21SmtB	TX_2016_3		217	q21SmtB.01040	SD	null	null	null	1	3	2.6	188	168.886	207.114	Yes	38.228
						q21SmtB	TX_2016_4		218	q21SmtB.03021	SD	null	null	null	3	3	3.3	121.3	106.241	136.359	Yes	30.118
						q21SmtB	TX_2016_5		219	q21SmtB.07021	SD	null	null	null	7	3	5.2	82.6	73.043	92.157	Yes	19.114
						q21SmtB	TX_2016_6		220	q21SmtB.10018	SD	null	null	null	10	3	5.6	78.3	69.426	87.174	Yes	17.748
						q21SmtB	MS_2017_1		221	q21SmtB.01041	SD	null	null	null	1	3	4.3	72.9	61.343	84.457	Yes	23.114
						q21SmtB	MS_2017_2		222	q21SmtB.01042	SD	null	null	null	1	3	13.6	134.3	130.646	137.954	Yes	7.308
						q21SmtB	MS_2017_3		223	q21SmtB.02026	SD	null	null	null	2	3	8.9	58.5	52.916	64.084	Yes	11.168
						q21SmtB	MS_2017_4		224	q21SmtB.05015	SD	null	null	null	5	3	8.3	138.5	132.513	144.487	Yes	11.974
						q21SmtB	MS_2017_5		225	q21SmtB.06018	SD	null	null	null	6	3	1.7	101.7	72.468	130.932	Yes	58.464
						q21SmtB	MS_2017_6		226	q21SmtB.07022	SD	null	null	null	7	3	4.4	57.3	46.006	68.594	Yes	22.588
						q21SmtB	MS_2017_7		227	q21SmtB.08015	SD	null	null	null	8	3	2.9	141.6	124.464	158.736	Yes	34.272
						q21SmtB	MS_2018_1		228	q21SmtB.01043	SD	null	null	null	1	3	5.5	65.7	56.665	74.735	Yes	18.07
						q21SmtB	MS_2018_2		229	q21SmtB.01044	SD	null	null	null	1	3	9.2	104.2	98.798	109.602	Yes	10.804
						q21SmtB	MS_2018_3		230	q21SmtB.01045	SD	null	null	null	1	3	4.3	223.9	212.343	235.457	Yes	23.114
						q21SmtB	MS_2018_4		231	q21SmtB.02027	SD	null	null	null	2	3	5.1	44.5	34.756	54.244	Yes	19.488
						q21SmtB	MS_2018_5		232	q21SmtB.03022	SD	null	null	null	3	3	3.1	56.5	40.469	72.531	Yes	32.062
						q21SmtB	MS_2018_6		233	q21SmtB.05016	SD	null	null	null	5	3	4.5	129.2	118.157	140.243	Yes	22.086
						q21SmtB	Combined_1		234	q21SmtB.01046	SD	null	null	null	1	3	9.9	85	79.98	90.02	Yes	10.04
						q21SmtB	Combined_2		235	q21SmtB.01047	SD	null	null	null	1	3	16.9	120.2	117.259	123.141	Yes	5.882
						q21SmtB	Combined_3		236	q21SmtB.02028	SD	null	null	null	2	3	5.4	63	53.797	72.203	Yes	18.406
						q21SmtB	Combined_4		237	q21SmtB.03023	SD	null	null	null	3	3	2.9	113.2	96.064	130.336	Yes	34.272
						q21SmtB	Combined_5		238	q21SmtB.05017	SD	null	null	null	5	3	7.3	129.5	122.692	136.308	Yes	13.616
						q21SmtB	Combined_6		239	q21SmtB.07023	SD	null	null	null	7	3	4.7	85.5	74.927	96.073	Yes	21.146
						q21SmtB	Combined_7		240	q21SmtB.10019	SD	null	null	null	10	3	1.6	14.6	-16.459	45.659	Yes	62.118
						q21SmtB	Combined_8		241	q21SmtB.10020	SD	null	null	null	10	3	2.5	70.8	50.922	90.678	Yes	39.756
						q21SmtB	MS_16.1		242	q21SmtB.01048	SD	null	null	null	1	8.16	9.8	110.4	108.4	110.9	Yes	2.5
						q21SmtB	MS_16.2		243	q21SmtB.01049	SD	null	null	null	1	9.98	11.69	119.1	118.3	125.2	Yes	6.9
						q21SmtB	MS_16.3		244	q21SmtB.01050	SD	null	null	null	1	6.95	8.11	130	127.5	130.1	Yes	2.6
						q21SmtB	MS_17.1		245	q21SmtB.01051	SD	null	null	null	1	12.69	11.6	125.8	125.8	126	Yes	0.2
						q21SmtB	MS_17.2		246	q21SmtB.01052	SD	null	null	null	1	14.9	12.88	134.3	132.9	137.6	Yes	4.7
						q21SmtB	MS_17.3		247	q21SmtB.02029	SD	null	null	null	2	8.47	9.62	49.3	48.7	51.6	Yes	2.9
						q21SmtB	MS_17.4		248	q21SmtB.02030	SD	null	null	null	2	9.45	9.81	58.5	55	61.5	Yes	6.5
						q21SmtB	MS_17.5		249	q21SmtB.05018	SD	null	null	null	5	8.71	9.84	129.5	129.2	130.9	Yes	1.7
						q21SmtB	MS_17.6		250	q21SmtB.05019	SD	null	null	null	5	8.87	9.69	134.8	130.9	136.6	Yes	5.7
						q21SmtB	MS_17.7		251	q21SmtB.07024	SD	null	null	null	7	4.08	3.35	57.3	54.3	61.7	Yes	7.4
						q21SmtB	MS_17.8		252	q21SmtB.08016	SD	null	null	null	8	4.35	0.04	141.5	135.8	142.6	Yes	6.8
						q21SmtB	MS_18.1		253	q21SmtB.01053	SD	null	null	null	1	10.06	11.3	100.8	100.6	100.9	Yes	0.3
						q21SmtB	MS_18.2		254	q21SmtB.01054	SD	null	null	null	1	10.72	11.48	104.2	102.8	105.4	Yes	2.6
						q21SmtB	MS_18.3		255	q21SmtB.02031	SD	null	null	null	2	4.85	7.53	44	41.6	52.6	Yes	11
						q21SmtB	TX_16.1		256	q21SmtB.01055	SD	null	null	null	1	4.14	6.45	84.3	79.7	90.5	Yes	10.8
						q21SmtB	TX_16.2		257	q21SmtB.01056	SD	null	null	null	1	6.13	0.0079	125.1	121.9	126.5	Yes	4.6
						q21SmtB	TX_16.3		258	q21SmtB.01057	SD	null	null	null	1	3.89	0.0058	137.3	132.9	138.3	Yes	5.4
						q21SmtB	TX_16.4		259	q21SmtB.10021	SD	null	null	null	10	5.12	7.15	78.3	68.6	85.6	Yes	17
						q21SmtB	4_ENV.1		260	q21SmtB.01058	SD	null	null	null	1	18.64	17.85	110.4	108.5	111.7	Yes	3.2
						q21SmtB	4_ENV.2		261	q21SmtB.01059	SD	null	null	null	1	20.27	15.56	119.1	116.6	121.5	Yes	4.9
						q21SmtB	4_ENV.3		262	q21SmtB.02032	SD	null	null	null	2	4.1	4.9	38.8	24.3	39.3	Yes	15
						q21SmtB	4_ENV.4		263	q21SmtB.02033	SD	null	null	null	2	6.06	7.38	44	40.1	54.7	Yes	14.6
						q21SmtB	4_ENV.5		264	q21SmtB.03024	SD	null	null	null	3	4.63	2.29	113.2	103.9	120.9	Yes	17
						q21SmtB	4_ENV.6		265	q21SmtB.05020	SD	null	null	null	5	7.49	8.92	129.5	128	132.7	Yes	4.7
						q21SmtB	4_ENV.7		266	q21SmtB.05021	SD	null	null	null	5	6.99	8.25	141	136.6	142.1	Yes	5.5
						q21SmtB	4_ENV.8		267	q21SmtB.07025	SD	null	null	null	7	5.44	5.36	77.3	67.3	83.5	Yes	16.2
						q21SmtB	4_ENV.9		268	q21SmtB.07026	SD	null	null	null	7	5.13	4.37	85	83.5	90.1	Yes	6.6
Warburton et al. 2009	Mp717	NC300	F2:3	270	SSR	q09Wbt	umc1057–bnlg1598.1	12	270	q09Wbt.01060	SD	null	null	null	1	3	3	11	8.4	13.8	Yes	5.4
						q09Wbt	umc1057–bnlg1598.2		271	q09Wbt.01061	SD	null	null	null	1	3	1	11	8.4	13.8	Yes	5.4
						q09Wbt	bnlg381–umc1783		272	q09Wbt.02034	SD	null	null	null	2	3	11	24	23.4	26.6	Yes	3.2
						q09Wbt	bnlg1325–phi036		273	q09Wbt.03025	SD	null	null	null	3	3	3	50	39	73.3	Yes	34.3
						q09Wbt	umc2136–phi058		274	q09Wbt.05022	SD	null	null	null	5	3	5	155	141.2	177.4	Yes	36.2
						q09Wbt	umc1978–umc1632.1		275	q09Wbt.07027	SD	null	null	null	7	3	1	5	1	14	Yes	13
						q09Wbt	umc1978–umc1632.2		276	q09Wbt.07028	SD	null	null	null	7	3	1	5	0	10	Yes	10
						q09Wbt	umc1782–umc1666		277	q09Wbt.07029	SD	null	null	null	7	3	6	5	0	12	Yes	12
						q09Wbt	umc1978–umc1632.3		278	q09Wbt.07030	SD	null	null	null	7	3	1	5	0	13	Yes	13
						q09Wbt	umc1978–umc1632.4		279	q09Wbt.07031	SD	null	null	null	7	3	2	5	1	11	Yes	10
						q09Wbt	bnlg666–umc1997		280	q09Wbt.08017	SD	null	null	null	8	3	5	105	100	115	Yes	15
						q09Wbt	bnlg1677–umc1898		281	q09Wbt.10022	SD	null	null	null	10	3	2	70	50	99.4	Yes	49.4
Warburton et al. 2011	Mp715	T173	F2:3	250	SSR	q11Wbt	bnlg1325.1	23	283	q11Wbt.03026	SD	null	null	null	3	3	4.3	57.1	49.5186	64.6814	Yes	15.1628
						q11Wbt	bnlg197		284	q11Wbt.03027	SD	null	null	null	3	3	3.7	136.1	127.289	144.911	Yes	17.6216
						q11Wbt	umc1506.1		285	q11Wbt.10023	SD	null	null	null	10	3	3.1	62.4	51.8839	72.9161	Yes	21.0323
						q11Wbt	umc1506.2		286	q11Wbt.10024	SD	null	null	null	10	3	3.2	66.4	56.2125	76.5875	Yes	20.375
						q11Wbt	umc1727.1		287	q11Wbt.01062	SD	null	null	null	1	3	2.7	13	0.925926	25.0741	Yes	24.1481
						q11Wbt	umc1291		288	q11Wbt.10025	SD	null	null	null	10	3	4.5	2	0	9.24444	Yes	9.24444
						q11Wbt	umc1789		289	q11Wbt.09009	SD	null	null	null	9	3	3.5	40.2	30.8857	49.5143	Yes	18.6286
						q11Wbt	bnlg1063		290	q11Wbt.03028	SD	null	null	null	3	3	4.1	125.6	117.649	133.551	Yes	15.9024
						q11Wbt	bnlg1325.2		291	q11Wbt.03029	SD	null	null	null	3	3	4.7	57.1	50.1638	64.0362	Yes	13.8723
						q11Wbt	bnlg1137		292	q11Wbt.04033	SD	null	null	null	4	3	5.1	109.1	102.708	115.492	Yes	12.7843
						q11Wbt	bnlg1144		293	q11Wbt.03030	SD	null	null	null	3	3	4.4	46.7	39.2909	54.1091	Yes	14.8182
						q11Wbt	umc1506		294	q11Wbt.10026	SD	null	null	null	10	3	4.2	62.4	54.6381	70.1619	Yes	15.5238
						q11Wbt	umc1727.2		295	q11Wbt.01063	SD	null	null	null	1	3	3.6	13	3.94444	22.0556	Yes	18.1111
						q11Wbt	bnlg1306		296	q11Wbt.05023	SD	null	null	null	5	3	7	38.1	33.4429	42.7571	Yes	9.31429
						q11Wbt	umc1970		297	q11Wbt.03031	SD	null	null	null	3	3	7	42.4	37.7429	47.0571	Yes	9.31429
						q11Wbt	bnlg1350		298	q11Wbt.03032	SD	null	null	null	3	3	5.3	129.7	123.549	135.851	Yes	12.3019
						q11Wbt	umc1153		299	q11Wbt.05024	SD	null	null	null	5	3	10	16	12.74	19.26	Yes	6.52
						q11Wbt	bnlg1046.1		300	q11Wbt.05025	SD	null	null	null	5	3	9	93.2	89.5778	96.8222	Yes	7.24444
						q11Wbt	mmc0081		301	q11Wbt.05026	SD	null	null	null	5	3	11.3	88.1	85.215	90.985	Yes	5.76991
						q11Wbt	phi029		302	q11Wbt.03033	SD	null	null	null	3	3	16.4	107.2	105.212	109.188	Yes	3.97561
						q11Wbt	bnlg1046.2		303	q11Wbt.05027	SD	null	null	null	5	3	12.6	89.2	86.6127	91.7873	Yes	5.1746
						q11Wbt	mmc0081		304	q11Wbt.05028	SD	null	null	null	5	3	15	88.1	85.9267	90.2733	Yes	4.34667
						q11Wbt	bnlg1046		305	q11Wbt.05029	SD	null	null	null	5	3	18.5	89.2	87.4378	90.9622	Yes	3.52432
Willcox et al. 2013	Mp313E	Va35	F2:3	216	SSR	qWcxA	umc128	32	307	qWcxA.01064	SD	null	null	null	1	3	7.4	163.2	141.173	185.227	No	44.0541
						qWcxA	umc128		308	qWcxA.01065	SD	null	null	null	1	3	21	163.2	155.438	170.962	No	15.5238
						qWcxA	asg62		309	qWcxA.01066	SD	null	null	null	1	3	22.4	141.2	133.923	148.477	No	14.5536
						qWcxA	umc67a		310	qWcxA.01067	SD	null	null	null	1	3	17.9	140.11	131.004	149.216	No	18.2123
						qWcxA	trpinh		311	qWcxA.02035	SD	null	null	null	2	3	5.8	104.8	76.6966	132.903	No	56.2069
						qWcxA	bnl5.37a		312	qWcxA.03034	SD	null	null	null	3	3	4.4	142.2	105.155	179.245	No	74.0909
						qWcxA	umc102		313	qWcxA.03035	SD	null	null	null	3	3	9.3	134.6	117.073	152.127	No	35.0538
						qWcxA	umc102		314	qWcxA.03036	SD	null	null	null	3	3	14.5	136.6	125.359	147.841	No	22.4828
						qWcxA	asg48		315	qWcxA.03037	SD	null	null	null	3	3	10.1	131.9	115.761	148.039	No	32.2772
						qWcxA	umc156		316	qWcxA.04034	SD	null	null	null	4	3	14.9	117.7	106.76	128.64	No	21.8792
						qWcxA	umc138		317	qWcxA.06019	SD	null	null	null	6	3	4.2	118.9	80.0905	157.71	No	77.619
						qWcxA	umc124		318	qWcxA.08018	SD	null	null	null	8	3	4	118.9	78.15	159.65	No	81.5
						qWcxA	umc12		319	qWcxA.08019	SD	null	null	null	8	3	6.5	149.4	124.323	174.477	No	50.1538
						qWcxA	umc38		320	qWcxA.09010	SD	null	null	null	9	3	3.9	64	22.2051	105.795	No	83.5897
						qWcxA	csu471		321	qWcxA.09011	SD	null	null	null	9	3	8.1	9.6	0	29.7235	No	29.7235
						qWcxA	csu471		322	qWcxA.09012	SD	null	null	null	9	3	8.3	5.8	0	25.4386	No	25.4386
						qWcxA	umc121		323	qWcxA.03038	SD	null	null	null	3	3	14.8	28.8	17.7865	39.8135	No	22.027
						qWcxA	umc156		324	qWcxA.04035	SD	null	null	null	4	3	16.1	110.8	100.676	120.924	No	20.2484
						qWcxB	csu164		326	qWcxB.01068	SD	null	null	null	1	3	4.1	176.4	157.994	194.806	No	36.8112
						qWcxB	umc67a		327	qWcxB.01069	SD	null	null	null	1	3	9.3	138.1	129.986	146.214	No	16.2286
						qWcxB	csu589		328	qWcxB.01070	SD	null	null	null	1	3	9	26	17.6152	34.3848	No	16.7695
						qWcxB	asg20		329	qWcxB.02036	SD	null	null	null	2	3	7.8	150.7	141.025	160.375	No	19.3495
						qWcxB	trpinh		330	qWcxB.02037	SD	null	null	null	2	3	5.8	101.8	88.7891	114.811	No	26.0217
						qWcxB	umc102		331	qWcxB.03039	SD	null	null	null	3	3	4.5	134.7	117.93	151.47	No	33.5391
						qWcxB	umc127		332	qWcxB.04036	SD	null	null	null	4	3	6.8	188.5	177.403	199.597	No	22.195
						qWcxB	phi026		333	qWcxB.04037	SD	null	null	null	4	3	6.1	98.8	86.429	111.171	No	24.742
						qWcxB	umc127		334	qWcxB.04038	SD	null	null	null	4	3	10.1	180.6	173.128	188.072	No	14.9432
						qWcxB	umc127		335	qWcxB.04039	SD	null	null	null	4	3	15.5	188.5	183.631	193.369	No	9.73716
						qWcxB	bnlg2291		336	qWcxB.04040	SD	null	null	null	4	3	14.9	170	164.935	175.065	No	10.1293
						qWcxB	bnl6.25		337	qWcxB.05030	SD	null	null	null	5	3	4.3	8	0	25.5495	No	25.5495
						qWcxB	bnlg249		338	qWcxB.06020	SD	null	null	null	6	3	4.5	31.1	14.3305	47.8695	No	33.5391
						qWcxB	bnl7.08b		339	qWcxB.08020	SD	null	null	null	8	3	14.9	128.7	123.635	133.765	No	10.1293
Womack et al. 2020	Mp719	Mp705		241	SNP & SSR	qWmk	PZE_101154189	21	341	qWmk.01071	SD	null	null	null	1	3	11.3	124.4	114.4	130.9	Yes	16.5
						qWmk	PZA00364_2		342	qWmk.01072	SD	null	null	null	1	3	8.8	183.2	179.1	185.4	Yes	6.3
						qWmk	PHM5622_21		343	qWmk.01073	SD	null	null	null	1	3	4.8	116.6	103.7	130.9	Yes	27.2
						qWmk	PZE_101171655		344	qWmk.01074	SD	null	null	null	1	3	12.7	141.4	138.9	147.2	Yes	8.3
						qWmk	PZE_101145417		345	qWmk.01075	SD	null	null	null	1	3	15.4	118.6	104.6	123.3	Yes	18.7
						qWmk	PZE_101210110		346	qWmk.01076	SD	null	null	null	1	3	6.8	177.9	173.9	181.8	Yes	7.9
						qWmk	PHM4880_179		347	qWmk.02038	SD	null	null	null	2	3	4.4	85.7	85.7	85.7	Yes	0
						qWmk	PZE_102036053		348	qWmk.02039	SD	null	null	null	2	3	3.6	59	55.5	61.7	Yes	6.2
						qWmk	PZE_103165542		349	qWmk.03040	SD	null	null	null	3	3	5.9	156.7	151.3	161.8	Yes	10.5
						qWmk	PZE_103169160		350	qWmk.03041	SD	null	null	null	3	3	10.5	161.4	155.4	169.4	Yes	14
						qWmk	PZE_103144159		351	qWmk.03042	SD	null	null	null	3	3	4.9	128	110.8	138.4	Yes	27.6
						qWmk	PZE_103169160		352	qWmk.03043	SD	null	null	null	3	3	9.2	159.9	153.5	164.1	Yes	10.6
						qWmk	PZE_104101251		353	qWmk.04041	SD	null	null	null	4	3	4.9	101.2	93.1	111	Yes	17.9
						qWmk	PHM3137_17		354	qWmk.05031	SD	null	null	null	5	3	3.5	31.6	22.8	39.7	Yes	16.9
						qWmk	PZE_105002166		355	qWmk.05032	SD	null	null	null	5	3	4.1	3	0	17.7	Yes	17.7
						qWmk	PZE_106057733		356	qWmk.06021	SD	null	null	null	6	3	4.9	49.6	31.6	55.9	Yes	24.3
						qWmk	PZE_108002941		357	qWmk.08021	SD	null	null	null	8	3	3.9	12.6	6.1	14.5	Yes	8.4
						qWmk	PZE_108057442		358	qWmk.08022	SD	null	null	null	8	3	3.8	72.5	66.7	87.5	Yes	20.8
						qWmk	PZE_109061001		359	qWmk.09013	SD	null	null	null	9	3	3.3	63	59.3	63.6	Yes	4.3
						qWmk	PZE_110067110		360	qWmk.10027	SD	null	null	null	10	3	5.1	44.2	29.3	55	Yes	25.7
						qWmk	PZE_110091181		361	qWmk.10028	SD	null	null	null	10	3	5.5	78.6	64.6	92.8	Yes	28.2
Yin et al. 2014	RA	M53		228	SNP & SSR	qYin	umc1389_E3	10	363	qYin.05033	SD	null	null	null	5	3.83	9.87	60.17	59.9	63.6	Yes	3.7
						qYin	umc1389_E2		364	qYin.05034	SD	null	null	null	5	5.34	9.73	60.17	59.9	61	Yes	1.1
						qYin	umc1389_E1		365	qYin.05035	SD	null	null	null	5	5.38	8.42	60.17	59.7	61	Yes	1.3
						qYin	umc1127		366	qYin.06022	SD	null	null	null	6	2.19	7.25	148.04	140.5	150.1	Yes	9.6
						qYin	dupssr14		367	qYin.08023	SD	null	null	null	8	2.12	3.83	67.69	66.4	68.1	Yes	1.7
						qYin	PZE_108023615		368	qYin.08024	SD	null	null	null	8	2.55	3.75	60.34	56.4	62.6	Yes	6.2
						qYin	umc1735		369	qYin.08025	SD	null	null	null	8	3.51	5.38	50.05	46.8	51.2	Yes	4.4
						qYin	PZE_110110920		370	qYin.10029	SD	null	null	null	10	2.24	4.79	128.55	109.1	131.8	Yes	22.7
						qYin	umc2349		371	qYin.10030	SD	null	null	null	10	2.3	3.6	86.82	86	89.3	Yes	3.3
						qYin	umc1196a		372	qYin.10031	SD	null	null	null	10	3.55	5.5	95.64	91	95.8	Yes	4.8
																	7.408
*Chr = chromosome, CI = confidence interval, cM = centi Morgan, Inf = inferior (lower), LOD = logarthm of odds, Pos = position, PVE = phenotypic varaince explained, Sup = superior (upper)
