# Supplementary material for: Comprehensive meta-analysis of QTL and gene expression studies identify candidate genes associated with Aspergillus flavus resistance in maize
Source: Front Plant Sci. 2023 Jul 18;14:1214907. doi: 10.3389/fpls.2023.1214907 (PMC10392829; doi:10.3389/fpls.2023.1214907)
Supplement: Supplementary file 3 [file Table_2.xlsx]

## Sheet: Sheet1
Supplementary Table S2. Studies used to compile genes differentially expressed under various abiotic and biotic stresses in maize
Stress	# Studies	References
Cold	7	Watitu et al. 2021, Avila et al. 2018, Goering et al. 2017, Li et al. 2017, Li et al. 2021, Mao et al. 2017, Sobkowiak et al. 2014
Nutrient	5	Chen et al. 2022, He et al. 2016, Laura et al. 2020, Singh et al. 2022, Zanin et al. 2017
Waterlogging	2	Yao et al. 2021, Arora et al. 2017
Drought	13	Maheswari et al. 2021, Bai et al. 2022, Jia et al. 2020, Yang et al. 2019, Ali et al. 2018, Danilevskaya et al. 2019, Kakumanu et al. 2012, Kim et al. 2021, Li et al. 2017, Li et al. 2021, Nepolean et al. 2017, Song et al. 2017, Zenda et al. 2019
Metal	1	Keskin et al. 2018
Heat	4	Li et al. 2014, Shi et al. 2017, Li et al. 2017, Zhao et al. 2019
Salt	6	Du et al. 2017, Zhang et al. 2015, Zhang et al. 2021, Chen et al. 2020, Li et al. 2017, Zhang et al. 2022
Virus	2	Ghorbani et al. 2018, Zhou et al. 2022
Weed	3	Bruggerman et al. 2020,Bruggerman 2016, House 2021
Fungus*	14	Luo et al. 2008,2011, Kelley et al. 2012, Shu et al. 2017, Vivian et al. 2017, Kebede et al. 2018, Shi et al. 2018, Han et al. 2020, Lambrey et al. 2020, Musungu et al. 2020, Shelma et al. 2020, He et al. 2021, Liu et al. 2021, Schuark et al. 2021
Bacterium	3	Hardoim et al. 2020,Li et al. 2021, Wu et al. 2015
Total	60
References listed in bold red font represent studies related to gene expression under Aspergillis flavus infection.
