# Supplementary material for: Comprehensive meta-analysis of QTL and gene expression studies identify candidate genes associated with Aspergillus flavus resistance in maize
Source: Front Plant Sci. 2023 Jul 18;14:1214907. doi: 10.3389/fpls.2023.1214907 (PMC10392829; doi:10.3389/fpls.2023.1214907)
Supplement: Supplementary file 4 [file Table_3.xlsx]

## Sheet: Sheet1
Table S3. Integrated genetic linkage map developed using markers from published linkage maps and B73 reference maps
chr=1
lg=1							Chromosome	cM	#markers	marker/cM
1	umc1354	0					Chr 1	391.4	144	2.71806
2	phi056	0					Chr 2	289.8	100	2.898
3	phi097	0					Chr 3	271.7	130	2.09
4	umc1177	0					Chr 4	290.1	93	3.11935
5	umc1566	0					Chr 5	194.4	93	2.09032
6	bnlg1014	26.3					Chr 6	171.3	85	2.01529
7	umc1363	26.3					Chr 7	203.7	82	2.48415
8	umc1269	26.3					Chr 8	211	79	2.67089
9	umc2012	26.3					Chr 9	203.3	79	2.57342
10	umc1977	26.3					Chr 10	146.2	75	1.94933
11	umc1071	28.3					Total	2372.9	960	2.47177
12	umc1948	28.3
13	umc1685	35.8
14	umc1160	39.3
15	umc2224	40.4
16	umc2225	45.9
17	umc1166	51.8
18	umc1568	55
19	bnlg1429	55
20	PZE_101050072	56.765
21	PZE_101050128	56.765
22	PZE_101050289	56.93
23	PZE_101056684	59.267
24	PZE_101056681	59.902
25	umc1976	63.9
26	umc2226	66.5
27	bnlg1953	66.5
28	umc1073	81.9
29	umc1403	83
30	bnlg1484	89.1
31	umc1397	93.7
32	umc1479	103.5
33	bnlg439	103.5
34	bnlg1203	103.6
35	bnlg1458	105.9
36	umc1880	118.4
37	phi109275	118.4
38	bnlg1866	118.7
39	bnlg2238	125.6
40	umc2124	125.6
41	umc1169	129.2
42	umc1917	131.2
43	umc2227	134.4
44	bnlg1811	135.8
45	umc2228	141.7
46	umc2229	145.6
47	bnlg2295	145.6
48	bnlg2086	145.6
49	umc2112	145.6
50	umc2025	151
51	umc1515	152.4
52	umc2230	159
53	umc1461	159
54	umc1493	159
55	umc1076	159
56	umc1676	159
57	umc2231	159
58	umc1703	159
59	umc1906	164.2
60	umc1903	164.8
61	umc2232	164.8
62	umc1395	164.8
63	umc1601	164.8
64	umc2233	164.8
65	umc1321	166.2
66	umc1603	166.2
67	umc1972	173.8
68	umc1812	178.5
69	umc1590	181.6
70	umc1811	184.7
71	bnlg2057	184.7
72	umc2234	184.7
73	bnlg1598	187.6
74	umc1123	187.6
75	umc1919	196.7
76	PZE_101205714	198.4
77	bnlg1057	198.6
78	umc1396	198.6
79	umc2235	198.6
80	PZE_101207892	199.7
81	PZE_101208074	199.9
82	umc1748	201
83	PZE_101210110	203
84	bnlg1615	208.7
85	umc1035	208.7
86	umc1709	208.7
87	umc1924	212.4
88	umc2236	215.2
89	umc1925	216.3
90	umc2237	216.3
91	umc2239	223.1
92	umc2238	226
93	umc1358	232.3
94	bnlg1556	232.3
95	bnlg1025	252
96	umc1128	255.5
97	umc1147	257.2
98	phi002	258.2
99	umc1245	258.2
100	phi002	258.2
101	phi037	258.2
102	phi038	258.2
103	umc1013	258.2
104	umc1998	265.2
105	bnlg2228	266.3
106	umc1955	267.7
107	umc2080	270.1
108	umc2181	272.1
109	umc1838	272.1
110	umc1446	272.1
111	umc1991	285.3
112	umc1383	286.7
113	umc2240	287.8
114	umc1914	290.9
115	umc1512	291.5
116	phi011	305.6
117	phi055	305.6
118	umc2047	305.6
119	bnlg1331	306.3
120	umc1082	315.2
121	umc1431	315.2
122	umc2189	317.2
123	umc1726	323.1
124	umc2149	324.3
125	bnlg1671	324.3
126	phi308707	328.4
127	umc1553	351.3
128	umc1421	352
129	umc1681	355.4
130	umc1129	357.5
131	umc1111	357.5
132	umc2241	358.2
133	umc2242	358.6
134	umc1118	359.9
135	umc1744	368.5
136	umc1630	369.3
137	umc2045	376.9
138	umc1331	380.6
139	phi227562	380.6
140	umc2243	380.6
141	phi064	380.6
142	umc1605	391.4
143	umc1819	391.4
144	umc2244	391.4
chr=2
lg=2
1	E81MCAG7	0
2	umc2246	1.7
3	phi96100	11.2
4	umc2245	11.2
5	umc1165	16.1
6	E71MCAG11	20
7	umc1542	20.6
8	bnlg1297	20.6
9	umc1980	26.9
10	umc1265	26.9
11	umc1961	30.9
12	umc1823	31.6
13	mmc0111	31.6
14	E81MCAC6	37
15	PZE_102041532	48.47
16	umc1756	49.2
17	bnlg2277	49.6
18	PZE_102045819	50.128
19	bnlg1327	52.6
20	PZE_102043341	53.6
21	PHM6111_5	53.6
22	umc1262	55.5
23	umc1261	56.2
24	umc1422	57.2
25	PHM1962_33	57.5
26	PZA02080_1	57.5
27	mmc0231	68.2
28	PZE_102098071	83.28
29	PZE_102100073	83.435
30	PZE_102101624	83.58
31	bnlg1064	98.1
32	phi109642	99.4
33	bnlg381	99.4
34	umc1024	99.4
35	umc2247	100.1
36	sdg102a	103.85
37	umc1635	104.75
38	bnlg2328	105.31
39	umc1448	105.7
40	umc1465	105.7
41	umc1541	105.7
42	umc1326	106.1
43	umc2248	106.1
44	phi083	109.6
45	bnlg1018	110.3
46	umc1580	110.3
47	bnlg1175	110.3
48	umc2251	110.3
49	umc2249	110.3
50	bnlg108	116.5
51	umc1259	116.5
52	umc2030	117.6
53	umc1861	117.6
54	umc2088	117.6
55	umc2079	117.6
56	umc1485	117.6
57	umc2250	122.7
58	umc2125	122.7
59	umc1454	129
60	umc1581	129
61	umc1635	129
62	mmc0401	129.8
63	umc1028	129.8
64	umc2110	131.2
65	umc2252	131.2
66	bnlg1831	133.1
67	umc1079	133.1
68	bnlg1036	134
69	umc1875	137.1
70	umc1080	137.1
71	umc1658	138
72	umc2253	138
73	umc2178	138
74	umc2254	138.9
75	bnlg1138	138.9
76	umc1923	138.9
77	umc1004	138.9
78	umc1755	139.6
79	umc1108	145.4
80	umc2129	146.8
81	umc1890	149.3
82	bnlg2077	163.7
83	umc1560	164.2
84	umc1049	164.2
85	bnlg1233	176.9
86	umc1947	178.8
87	umc1604	179.8
88	bnlg1316	179.8
89	umc1633	187
90	mmc0381	194.3
91	bnlg1746	194.7
92	bnlg1940	197.5
93	umc1516	198.5
94	umc1256	213.1
95	umc1252	213.1
96	bnlg469	230.6
97	bnlg1893	230.6
98	umc2184	238.9
99	bmc1520	254.1
100	umc2214	289.8
chr=3
lg=3
1	E71MCAC6	0
2	umc2118	0
3	umc2101	0
4	umc2102	0
5	umc2103	0
6	umc2104	0
7	umc2105	0
8	umc2106	0
9	umc2107	0
10	umc2108	0
11	umc2109	0
12	umc1931	2.1
13	umc1746	2.1
14	umc2255	3.6
15	umc1780	3.6
16	umc1394	9.5
17	umc2256	10.4
18	umc1970	12.6
19	umc2071	13.1
20	umc2257	13.1
21	umc1892	14
22	umc2049	18.1
23	E81MCAT7	24
24	umc1458	28.6
25	PZE_103062648	32.387
26	PZE_103061576	32.616
27	PZE_103063833	32.621
28	pza03212	34.08
29	bnlg1144	34.2
30	umc1886	34.2
31	umc1057	42.2
32	bnlg1647	44.2
33	umc2258	57.4
34	bnlg1447	57.4
35	umc2259	57.4
36	PZE_103046475	58.451
37	PZE_103044842	58.869
38	PZE_103044317	59.051
39	phi036	75.7
40	umc1012	75.7
41	umc1030	75.7
42	PZE_103090601	77.5
43	PZE_103090563	77.7
44	umc1729	78.5
45	umc1772	78.5
46	phi243966	78.5
47	umc1425	78.5
48	umc2000	78.5
49	umc1608	78.5
50	PZE_103091108	78.7
51	PZE_103092933	80.5
52	umc2033	83.5
53	umc2158	83.9
54	umc1495	83.9
55	umc1392	83.9
56	umc1742	89.9
57	umc2117	89.9
58	bnlg1019	89.9
59	bnlg1113	89.9
60	bnlg1452	89.9
61	umc1717	89.9
62	umc1655	91.3
63	mmc0132	94.4
64	umc2261	95.5
65	mmc0312	95.5
66	umc1908	95.5
67	umc2262	95.5
68	umc2263	98.3
69	umc1504	100
70	umc1968	101.3
71	umc2264	101.3
72	umc1683	101.3
73	umc1449	102.3
74	umc1527	103.7
75	umc1773	103.7
76	umc2002	105.3
77	umc1174	106.5
78	umc1600	106.5
79	umc1693	106.5
80	bnlg1601	106.5
81	umc1102	106.5
82	bnlg1035	106.5
83	mmc0022	114
84	umc2020	114
85	umc1167	114
86	umc1501	114
87	umc1973	132.8
88	umc1539	133.9
89	umc1311	133.9
90	umc1730	137.3
91	umc1027	137.3
92	umc1266	146.1
93	umc2266	147.3
94	phi102228	151.5
95	umc2267	151.5
96	umc2268	155.5
97	umc1644	164.3
98	bnlg1951	166.5
99	umc2269	166.5
100	bnlg1160	169.5
101	umc2270	169.8
102	umc2271	169.8
103	bnlg197	177.2
104	umc2050	182.5
105	umc1135	183.7
106	umc1767	183.7
107	umc2272	188
108	umc1528	188
109	bnlg1605	188
110	umc1399	188
111	umc1489	195
112	umc1404	195
113	umc2273	197.9
114	umc1825	203.6
115	umc1140	216.8
116	umc2275	216.8
117	umc1915	220.3
118	bnlg1108	220.3
119	umc2081	223.9
120	umc1273	223.9
121	umc1320	224.9
122	umc2152	240.6
123	umc2008	244
124	umc2277	244.7
125	umc1813	244.7
126	bnlg1754	249.4
127	phi047	251
128	bnlg1496	251
129	umc1641	263.5
130	umc1594	271.7
chr=4
lg=4
1	E71MCAA4	0
2	umc2278	1.8
3	phi072	2.6
4	umc1008	2.6
5	bnlg1434	2.6
6	umc2279	3.9
7	umc1228	3.9
8	nc135	3.9
9	E71MCAA5	18
10	phi295450	30.5
11	umc1757	30.5
12	umc1759	30.5
13	umc1943	42
14	pza02457_1	55.4
15	PZE_104026803	55.8
16	PZA03043_14	56
17	PZE_104027342	56
18	umc1926	64.4
19	umc2082	64.4
20	umc2281	71.1
21	umc2280	71.1
22	umc1902	71.1
23	E81MCAA4	73
24	umc2176	73.3
25	umc2039	81.8
26	E71MCAA2	86
27	umc1117	88
28	umc1963	90.6
29	umc1652	90.6
30	mmc0471	90.6
31	bnlg490	90.6
32	umc1969	91.4
33	umc2061	91.4
34	umc2282	96.1
35	nc005	96.5
36	phi026	96.5
37	phi079	96.5
38	umc1088	96.5
39	umc1303	97.3
40	bnlg1265	100.1
41	umc1964	100.1
42	umc1031	103.7
43	umc1953	103.7
44	umc1175	105.9
45	umc2283	110.6
46	umc1511	110.6
47	umc1791	111.3
48	bnlg1755	111.3
49	umc1142	111.3
50	umc1346	111.3
51	umc1702	111.3
52	mmc0371	114.1
53	umc2284	114.1
54	umc1945	114.1
55	bnlg2291	135.7
56	bnlg1137	135.7
57	umc2038	141.7
58	bnlg1189	147.9
59	PHM4310_112	151.359
60	PZE_104154700	152.774
61	umc1775	154.6
62	PZE_104157101	160.744
63	umc1808	162.1
64	umc1476	164.9
65	bnlg2244	166.8
66	umc1899	166.8
67	bnlg2162	167.9
68	umc2285	171.1
69	umc2187	179.5
70	umc1132	181.7
71	umc2286	181.7
72	umc2188	181.7
73	umc2139	190.8
74	umc1940	194.6
75	umc1999	194.6
76	umc2287	202.9
77	umc1328	204
78	umc2046	212.4
79	umc1101	213.6
80	bnlg589	221.5
81	umc1532	222.3
82	umc1109	231.7
83	umc2288	234.2
84	umc1180	238.8
85	umc2289	241.7
86	umc1649	252.4
87	phi006	252.4
88	phi076	252.4
89	umc1050	252.4
90	umc1197	252.4
91	umc2290	252.4
92	umc1707	252.4
93	umc1503	290.1
chr=5
lg=5
1	PZE_105002105	0
2	umc2291	7.8
3	umc1253	8.2
4	umc2292	8.2
5	PZE_105006245	9.4
6	umc1423	12.8
7	umc1445	15.8
8	umc2022	15.8
9	umc1097	15.8
10	bnlg1006	15.8
11	umc1901	15.8
12	umc1325	17.4
13	umc1260	22.7
14	umc1679	25.1
15	umc1523	25.1
16	E81MCAG9	28
17	E81MCAG10	50
18	umc2036	52
19	bnlg565	55.6
20	PHM4647_8	58.411
21	PHM12992_5	59.51
22	PHM3691_18	59.691
23	PZE_105051986	60
24	umc1587	60.4
25	PZE_105053856	61.7
26	PZE_105054496	61.7
27	E71MCAG7	64
28	PZE_105060871	64.3
29	bnlg1879	78.2
30	umc2293	82.5
31	E81MCAG12	84
32	bnlg1046	89.3
33	umc1597	90.7
34	mmc0351	90.7
35	umc2035	92.4
36	umc1705	92.4
37	umc1557	96.7
38	umc2294	96.7
39	umc1048	98.1
40	umc1447	98.1
41	umc2295	98.1
42	umc1315	98.1
43	umc2296	100.1
44	umc1935	100.1
45	umc1830	102.1
46	PZE_105113193	102.581
47	PZA00300_11	105
48	umc1692	105
49	PZE_105115759	105.468
50	PZE_105115809	105.778
51	umc1609	106
52	umc2297	106
53	umc1355	106
54	umc1870	106
55	phi109188	106.9
56	umc1389	106.9
57	umc1429	106.9
58	umc2161	108.6
59	bnlg1902	110.1
60	umc2298	112.2
61	umc2299	113
62	bnlg1892	113
63	umc2301	113
64	umc2302	113
65	umc1990	113
66	umc1591	115.5
67	umc2300	115.5
68	umc1060	115.5
69	umc1747	115.5
70	bnlg1208	118.6
71	umc1349	122.9
72	umc1221	128.8
73	umc1966	129.8
74	umc1482	131.7
75	mmc0081	133.8
76	umc2026	136.7
77	umc2164	141.3
78	umc1264	141.3
79	umc2304	141.3
80	umc2303	143.7
81	umc1155	143.7
82	umc1019	162.8
83	mmc0481	164.9
84	umc2305	168.1
85	umc1752	169.3
86	umc1524	172.5
87	umc1680	172.5
88	umc1941	172.9
89	phi087	172.9
90	umc2306	178
91	bnlg609	178
92	phi085	193.9
93	phi048	194.4
chr=6
lg=6
1	PZE_106001418	0
2	umc2309	1.4
3	umc2310	1.6
4	umc1143	4.3
5	PZE_106003733	7.419
6	PZE_106003908	7.419
7	PZE_106003958	7.574
8	umc1018	10.3
9	umc1606	13.7
10	PZE_106023979	15.557
11	PM01_000033H	15.557
12	PZE_106016962	15.738
13	umc2311	18
14	bnlg1371	18.4
15	umc1229	18.4
16	umc2312	19.8
17	bnlg1867	19.8
18	umc2314	23.6
19	umc2313	24.4
20	umc2074	24.4
21	bnlg1641	24.4
22	umc1444	24.4
23	umc1133	24.4
24	umc2056	24.4
25	umc1006	24.4
26	umc1656	24.4
27	umc1083	24.7
28	umc1257	24.7
29	bnlg2191	27.2
30	umc2316	36.8
31	umc1887	36.8
32	umc1796	36.8
33	umc1918	36.8
34	umc1105	45.2
35	umc1979	45.2
36	umc1857	45.2
37	phi031	47.9
38	umc1014	47.9
39	umc2006	59
40	umc2317	61.2
41	umc2318	65.4
42	umc2319	65.4
43	pza01029	68.5
44	pza02048	68.5
45	pza02396	69.09
46	pco139551	70.79
47	bnlg1154	72.2
48	umc1250	72.2
49	umc1826	73.9
50	umc1352	73.9
51	umc1413	75.1
52	umc1114	75.6
53	umc1314	75.6
54	umc2141	75.6
55	umc1379	75.6
56	bnlg2249	76.3
57	umc1388	77.4
58	phi102	79.5
59	bnlg1174	79.5
60	umc2320	80.7
61	nc012	80.7
62	phi078	80.7
63	bnlg1702	81.9
64	umc2321	84.2
65	bnlg1732	98.9
66	umc1912	108.1
67	umc1859	108.1
68	umc1463	108.1
69	umc1762	109.5
70	umc2162	112.4
71	umc2322	113.4
72	umc2170	126.8
73	phi070	133.1
74	umc1063	133.1
75	umc1490	140.7
76	umc2323	148.6
77	bnlg1759	151.7
78	umc1350	151.7
79	umc2165	153.7
80	bnlg1740	157.6
81	bnlg1136	165.9
82	bnlg1136	165.9
83	umc1653	169.1
84	umc2059	171.3
85	umc2324	171.3
chr=7
lg=7
1	PZE_107003187	0
2	umc2177	4.5
3	PZE_107005454	7.757
4	PZE_107005832	9.342
5	umc1241	16.4
6	PZE_107008696	17.672
7	umc1378	21.6
8	umc1642	22.6
9	PZE_107018459	27.633
10	PZE_107019073	27.633
11	umc1672	33.8
12	umc1694	35.2
13	umc1695	35.2
14	umc1426	36.8
15	bnlg2132	38.5
16	PZE_107058547	50.1
17	PZE_107059013	50.8
18	PZE_107061306	52.3
19	PZE_107062095	53.5
20	umc1159	64.3
21	umc2160	75.5
22	umc1270	77.4
23	umc1632	77.4
24	umc2325	77.4
25	umc1068	77.4
26	phi057	78.3
27	phi112	78.3
28	umc1066	78.3
29	umc1401	86
30	umc1986	86
31	umc2326	86
32	umc1978	86
33	umc2327	87.1
34	bnlg1094	90.6
35	umc1879	90.6
36	bnlg1247	90.6
37	bnlg1380	90.6
38	bnlg1792	90.6
39	umc1932	90.6
40	bnlg2203	91
41	umc1983	93.6
42	umc2142	95
43	umc1138	95
44	umc1929	95
45	umc1787	95
46	umc2092	96.8
47	umc1393	96.8
48	bnlg1808	103.3
49	umc1713	107.8
50	umc1015	107.8
51	umc1450	115.1
52	umc1987	115.8
53	bnlg434	116.7
54	bnlg1070	118.4
55	phi091	119.6
56	umc1660	132.3
57	umc1408	134.4
58	umc1837	137.8
59	umc1865	137.8
60	umc1134	137.8
61	umc2328	137.8
62	bnlg2271	137.8
63	umc2329	137.8
64	umc1112	137.8
65	umc1324	138.4
66	umc1888	138.4
67	bnlg1805	138.4
68	umc1301	144.5
69	umc1936	144.5
70	umc2330	146.3
71	umc2331	146.3
72	umc1710	147.2
73	umc1251	148.3
74	bnlg1666	158.6
75	umc1029	167.5
76	umc1708	182
77	umc2332	182
78	umc1768	182
79	phi328175	182.7
80	bnlg2259	184.1
81	umc1295	187.9
82	umc1412	203.7
chr=8
lg=8
1	PZE_108001699	0
2	PZE_108001108	1.4
3	PZE_108001699	2.1
4	PZE_108002184	4.9
2	umc1139	11.8
3	umc1414	18.1
4	PZE_108005561	20.519
5	PZE_108005788	20.984
6	umc1327	22.1
7	PZE_108007795	24.665
8	umc1483	30
9	umc2352	30.9
10	bnlg1194	31.4
11	umc1817	35.4
12	PZE_108016983	40.398
13	umc1304	42.4
14	PZE_108019866	43.941
15	bnlg2235	46.9
16	PZE_108027707	48.699
17	umc1974	54.3
18	umc1913	54.3
19	umc1530	63.1
20	umc2147	75.2
21	umc2146	75.2
22	bnlg2082	75.2
23	umc2353	75.2
24	bnlg1834	75.2
25	umc1904	75.2
26	umc1807	77.9
27	umc1157	77.9
28	umc2354	81
29	umc1470	83.6
30	umc2355	83.6
31	umc1984	83.6
32	bnlg1863	83.6
33	umc1415	84.3
34	umc2075	85.9
35	phi100175	87.8
36	umc1735	89.9
37	umc1457	91.3
38	phi121	92.3
39	phi014	93.1
40	phi060	93.1
41	umc1202	93.1
42	umc2154	93.1
43	umc1460	93.6
44	umc1858	94.1
45	bnlg2046	97.6
46	umc1130	99.7
47	bnlg1176	99.7
48	umc1309	106.4
49	umc1343	106.4
50	umc1959	106.4
51	umc1562	108.5
52	umc1263	108.5
53	umc1846	108.5
54	bnlg2181	108.5
55	bnlg162	108.5
56	bnlg666	108.5
57	bnlg1651	110.6
58	umc1889	112.7
59	umc1340	112.7
60	umc1316	112.7
61	umc1777	114.1
62	umc2356	123.5
63	umc1960	123.5
64	umc1149	123.5
65	bnlg1152	123.9
66	umc1728	134.2
67	umc1905	139
68	bnlg1031	150.1
69	bnlg1065	150.1
70	umc1607	150.1
71	bnlg1823	161.3
72	umc1268	165.7
73	umc2357	172.9
74	umc1933	181.7
75	phi015	192.2
76	phi080	192.2
77	umc1069	192.2
78	umc1663	198.2
79	umc1638	211
chr=9
lg=9
1	PZE_109000915	0
2	PZE_109003658	1.623
3	PZE_109001327	2
4	umc1957	5.8
5	PZE_109006355	6.589
6	PZA00410_2	6.589
7	bnlg1724	12.9
8	umc1370	13.6
9	umc1867	13.6
10	umc1040	14
11	bnlg2122	14
12	bnlg1583	31.7
13	bnlg1810	31.7
14	umc1809	31.7
15	umc1809	31.7
16	umc2335	34.1
17	phi028	36.7
18	umc1588	36.7
19	phi017	36.7
20	umc1967	37.9
21	umc1596	38.9
22	umc1170	41.4
23	umc2336	53.8
24	umc1636	53.8
25	bnlg244	59.3
26	bnlg1401	60
27	phi022	65.6
28	phi027	65.6
29	phi061	65.6
30	umc1634	65.6
31	umc1258	67
32	umc1586	69.2
33	umc2338	71.2
34	umc2337	71.2
35	umc1599	75.7
36	umc1191	78
37	umc2340	78.7
38	umc2339	78.7
39	umc1271	78.7
40	nc134	78.7
41	umc1688	78.7
42	umc1700	82
43	umc2087	82
44	umc1743	82
45	umc1267	82.5
46	bnlg1209	86.8
47	umc1107	88.5
48	bnlg1159	88.9
49	bnlg1012	92.4
50	umc1492	94
51	umc1120	94.5
52	phi032	94.5
53	umc2121	95
54	umc1078	100.5
55	umc1231	101.2
56	umc1657	101.2
57	umc2095	109.6
58	umc2341	109.6
59	umc2344	109.6
60	umc2342	109.6
61	umc2343	109.6
62	PZE_109111133	128.1
63	PZE_109114762	132.8
64	PZE_109119001	138.2
65	PZE_109119987	139.8
66	umc2346	143.4
67	umc1733	144.9
68	umc2345	144.9
69	umc1366	146.4
70	umc1789	155.8
71	phi448880	156.9
72	bnlg619	165.9
73	umc2089	168.6
74	umc2131	171.8
75	umc1714	171.8
76	umc1137	192.1
77	bnlg1129	201.3
78	umc1505	202.1
79	umc1982	203.3
chr=10
lg=10
1	PZE_110000589	0
2	umc1318	0
3	PZE.108000665	2
4	umc1139	7
5	umc1380	7.9
6	phi041	7.9
7	PZE_110005657	8.5
8	PZA02221_20	9.564
9	PZE_110005657	20.3
10	MTN1803	21
11	MTN1803	21
12	umc2053	21.2
13	PHM3631_47	21.265
14	umc2018	23.1
15	PZE_110007091	25.376
16	phi052	27.3
17	umc1152	27.3
18	umc2034	34.4
19	umc1337	39.1
20	phi059	39.1
21	umc1582	39.1
22	umc2114	39.1
23	bnlg210	50
24	umc1962	51.5
25	umc1367	52.5
26	umc2016	54.9
27	umc1381	55.5
28	umc2067	55.5
29	umc1345	55.5
30	bnlg1079	60.7
31	umc1239	60.7
32	bnlg1712	61.4
33	phi050	62.5
34	umc2349	62.5
35	bnlg1655	62.5
36	umc1739	62.5
37	umc1336	62.5
38	umc2180	62.5
39	umc2348	62.9
40	umc1995	62.9
41	umc1246	63.3
42	umc1077	65.1
43	PZE_110074757	67.147
44	MZETC34	68.4
45	PZE_110076191	68.632
46	umc2163	68.8
47	umc1911	69.2
48	umc1453	69.2
49	umc2350	71
50	umc1330	71
51	umc1697	71
52	umc1272	74.1
53	umc1648	74.1
54	umc1115	76.3
55	umc2003	77.7
56	umc1930	77.7
57	umc1677	77.7
58	bnlg1074	77.7
59	bnlg1250	77.7
60	umc1506	83.7
61	umc1477	84.8
62	umc1045	91.4
63	bnlg1028	93.6
64	umc1993	104.5
65	bnlg2190	104.5
66	umc1196	113.9
67	umc1084	114.3
68	bnlg1677	117.8
69	bnlg1839	124.1
70	umc1176	125.6
71	umc2351	125.6
72	bnlg1360	126.3
73	bnlg1450	133.1
74	umc2021	146.2
75	umc2126	146.2
