# Supplementary material for: Comprehensive meta-analysis of QTL and gene expression studies identify candidate genes associated with Aspergillus flavus resistance in maize
Source: Front Plant Sci. 2023 Jul 18;14:1214907. doi: 10.3389/fpls.2023.1214907 (PMC10392829; doi:10.3389/fpls.2023.1214907)
Supplement: Supplementary file 5 [file Table_4.xlsx]

## Sheet: Sheet1
Supplementary Table S4: The consensus genetic map developed using the integrated linkage map on B73 reference genetic map with shared common markers and the goodness-of-fit value of the genetic map for projection of QTLs
chr=1
lg=1
1	AY110314	0
2	csu589	0.0318555				LG	cM	#markers	Avg. distance	# SNPs	Correlation between B73 and ConsMap
3	umc94a	0.0543546				lg1	412.373	781	0.528007	473	0.942609
4	umc1177	0.0884884				lg2	307.333	558	0.550776	342	0.898573
5	phi056	0.0884884				lg3	272.395	608	0.448018	365	0.968203
6	PZA03613_2	0.0884884				lg4	290.1	501	0.579042	299	0.930535
7	phi097	0.0884884				lg5	239.023	568	0.420816	343	0.973351
8	umc1354	0.0884884				lg6	173.34	444	0.390405	266	0.984609
9	umc1566	0.0884884				lg7	247.389	387	0.639249	209	0.876271
10	dmt103b	0.118897				lg8	215.766	499	0.432397	306	0.948271
11	cl15090_1	0.344371				lg9	215.018	358	0.600608	200	0.986998
12	PZA01271_1	3.99898				lg10	182.357	319	0.571653	165	0.974075
13	PZE_101000349	5.49898				Total	2555.1	5023	0.508679	2968
14	PZE_101001044	8.00337				# SSR and others				2055	0.948349	average
15	PZE_101003133	11.2424
16	PZE_101003135	11.3873
17	PZE_101004337	11.4451
18	pba1	11.8712
19	pza02129_1	12.0765
20	PZE_101005008	13.0679
21	bmc1124	13.7693
22	PZE_101005766	14.328
23	PZA02869_2	14.5054
24	PZE_101005765	14.6693
25	B11243	16.0232
26	PZE_101009538	17.5562
27	bnl5.62	18.1268
28	PHM4997_17	18.6968
29	PZE_101009528	18.732
30	mlo1	18.8556
31	PM01_00005C2	19.5902
32	PHM6238_36	22.2456
33	PZE_101013818	23.3121
34	PHM13094_8	24.9566
35	phm6238	25.0665
36	pza00175_2	25.6506
37	PZA00181_2	25.7121
38	PZE_101015471	26.1978
39	cl3927_1a	26.3884
40	umc2012	26.3885
41	umc1269	26.3885
42	umc1977	26.3885
43	bnlg1014	26.3885
44	umc1363	26.3885
45	umc1282	26.4257
46	PZA00447_6	26.5322
47	PZA00731_6	26.7824
48	PZA00731_7	27.1986
49	PZA00731.6	27.3258
50	PZE_101016971	27.7056
51	cl10432_1	27.803
52	umc1041	27.8075
53	umc1292	28.2776
54	umc1071	28.3885
55	umc1948	28.3885
56	PZA00566.5	29.0112
57	cl4845_1	29.8651
58	PZE_101017463	30.012
59	PZE_101017779	30.5481
60	PZE_101018199	30.977
61	PZE_101019726	33.3446
62	umc10711	34.0995
63	gpm125	34.3759
64	PZE_101021455	34.8168
65	PZE_101021479	34.9942
66	PZE_101021926	35.8831
67	umc1685	35.8885
68	umc157	36.034
69	PZE_101021986	36.1492
70	lls1	37.2398
71	umc1727	37.3275
72	PHM1653_31	38.6408
73	PZE_101025101	38.8544
74	umc1160	39.3885
75	umc2224	40.4885
76	PZE_101027125	40.7174
77	rab30	42.9454
78	PZE_101029737	42.9628
79	PZE_101029990	43.1464
80	PZE_101029759	43.1891
81	PZE_101031077	43.7934
82	PZE_101032015	44.3482
83	PZE_101032991	45.084
84	umc157(chn)	45.7926
85	umc1222	45.9809
86	umc2225	45.9885
87	PZE_101034578	47.384
88	PZE_101034091	47.4499
89	PHM13619_5	47.511
90	PZA02487_1	48.0046
91	PZE_101035341	48.4876
92	PHM3226_15	48.8015
93	PHM4531_46	49.3357
94	csu1171	49.9425
95	PZE_101036318	50.568
96	pco117644	50.633
97	PM01_0000220	50.8795
98	PZE_101036862	51.2987
99	PZE_101037191	51.4597
100	PZE_101037854	51.7783
101	PZE_101038268	51.8497
102	umc1166	51.8885
103	PZE_101039024	51.9444
104	PZE_101039351	52.0162
105	PZE_101039440	52.1426
106	lox9	52.2114
107	PZE_101040619	52.3933
108	PZE_101041178	52.847
109	PZE_101043656	52.872
110	PZE_101043600	52.9167
111	PZE_101040607	53.7012
112	vp5	53.747
113	csu111	53.8337
114	PM01_0000568	53.9989
115	bnlg1429	55.0885
116	umc1568	55.0885
117	PZE_101048890	55.9419
118	PZE_101047239	55.9449
119	PZE_101048744	55.9633
120	PZB01662_2	56.1467
121	PZE_101049120	56.1665
122	PHM835_25	56.3465
123	PZE_101050072	56.8535
124	PZE_101050128	56.8535
125	PZE_101050289	57.0185
126	PZE_101050298	57.0212
127	PZE_101050744	57.1836
128	PZA00192_6	57.5843
129	PHM4597_14	58.5067
130	PZE_101054457	58.5772
131	PZE_101055749	58.8953
132	PZE_101056007	59.1315
133	PZE_101056684	59.3555
134	PZE_101056681	59.9905
135	PHM2177_85	60.2636
136	PHM3726_129	60.6956
137	umc1070	60.9034
138	pco094430	60.9207
139	PHM11000_21	60.9554
140	PZE_101059325	61.0946
141	PZE_101059784	61.1016
142	bnlg1803	61.4003
143	PZE_101059816	61.5292
144	PZA02376_1	62.2542
145	PZE_101061114	62.3673
146	PZE_101060930	62.7828
147	phm13619	62.844
148	umc1402	63.2534
149	PM01_0000588	63.3528
150	PZE_101063074	63.8262
151	PZE_101062246	63.8464
152	umc1976	63.9885
153	pzb01957	64.0838
154	umc76	64.1627
155	PZE_101062970	64.2003
156	PZE_101062642	64.6014
157	PZE_101063328	64.9994
158	bnlg147	65.2874
159	pzb01662	65.577
160	cl42523_1	65.7639
161	BC324_2000	65.836
162	PZE_101064477	66.0124
163	pco060763	66.1548
164	bnlg1953	66.5885
165	umc2226	66.5885
166	PZE_101067628	68.4004
167	PZA00065_2	68.6426
168	PZE_101065758	68.7581
169	PZE_101068716	69.9696
170	PZE_101069763	70.6476
171	PZE_101069307	70.7897
172	PHM12323_17	72.139
173	PZE_101071162	72.8786
174	PZE_101071289	73.3928
175	PZE_101073696	74.0793
176	PHM2130_29	74.4295
177	PZE_101073495	74.7211
178	PZE_101074049	75.6028
179	PZB01062_3	76.077
180	PZE_101075379	77.8989
181	PHM574_14	78.2619
182	PZE_101077314	78.5758
183	PZE_101078026	78.6719
184	PZE_101077491	78.7228
185	PZE_101077867	78.7431
186	PZE_101077213	78.7578
187	PZE_101077670	78.7975
188	PZA00378_9	79.14
189	PZE_101078713	79.2945
190	PZE_101078745	79.3901
191	PZA00294_20	79.4523
192	PZE_101079844	79.4945
193	PZE_101080379	79.8251
194	PZE_101120159	80.3675
195	umc1073	81.9885
196	PZE_101081568	82.0356
197	PZE_101081679	82.0418
198	PZE_101081882	82.2147
199	PZE_101082523	82.3289
200	PZE_101082552	82.5305
201	PZE_101082812	82.6145
202	umc1403	83.0885
203	PZE_101090535	83.5384
204	PZE_101083942	85.8125
205	PZE_101083968	85.991
206	PHM5481_94	86.4622
207	PZE_101085771	86.8187
208	PZE_101085101	87.177
209	PZA00714_1	87.1913
210	PZE_101086606	87.6748
211	PZE_101086985	88.3229
212	PZE_101087443	88.5861
213	PZE_101087503	88.8882
214	PHM5306_16	89.0404
215	bnlg1484	89.1885
216	AY109929	89.4803
217	PZE_101088395	89.4946
218	AY110052	89.9286
219	BC324_2500	90.4355
220	PZE_101089347	90.9874
221	PHM4185_13	91.657
222	PZE_101090870	92.9616
223	S1_85016181	93.6075
224	umc1397	93.7885
225	PZE_101093639	94.4834
226	PCO063726	95.4702
227	PZE_101093863	95.4911
228	AY106736	95.5284
229	PZE_101096065	95.614
230	umc11a	95.9375
231	PZE_101099263	96.9334
232	PZE_101094324	97.5331
233	pza03742	97.9567
234	umc13	98.1121
235	PZE_101096127	98.3923
236	pzb00872	98.443
237	pdc3	98.5984
238	PZE_101096958	98.9354
239	PZE_101100521	99.6593
240	PM01_000062H	99.7344
241	PZE_101100477	99.9012
242	PHM9418_11	99.9046
243	PZA02763_1	99.9762
244	PZE_101103230	100.135
245	PZE_101101922	100.171
246	PZE_101102819	100.176
247	PZE_101101518	100.193
248	PZE_101104637	100.202
249	PZE_101104938	100.223
250	PZE_101103937	100.225
251	PHM3463_18	100.245
252	PZE_101108224	100.257
253	PZE_101105979	100.35
254	PZE_101105288	100.352
255	PZE_101111015	100.377
256	csu1138_4	100.441
257	PZA00010_5	100.559
258	PZE_101108844	100.594
259	PZE_101111667	100.632
260	PZE_101109787	100.659
261	PZE_101109763	100.659
262	PZA00205_7	100.715
263	PZA02292	100.861
264	PZE_101111508	100.876
265	AY110393	100.977
266	PZE_101112285	100.996
267	PZE_101112660	101.032
268	PZE_101117617	101.053
269	PZE_101113716	101.149
270	PZE_101120831	101.183
271	asg45(ptk)	101.21
272	PZE_101117018	101.266
273	PZE_101110859	101.294
274	PZE_101118670	101.333
275	PZE_101112384	101.388
276	PZA02577_1	101.402
277	PZE_101117251	101.486
278	PZE_101122121	101.565
279	PM01_00005A7	101.773
280	PZE_101122455	101.898
281	PZE_101122614	102.088
282	PZE_101122861	102.113
283	PHM8074_6	102.622
284	pza03168	102.747
285	PZE_101123210	102.754
286	PZE_101126587	103.186
287	PZE_101126017	103.454
288	bnlg439	103.588
289	umc1479	103.588
290	bnlg1203	103.688
291	PZE_100001428	104.122
292	PZE_101129564	104.241
293	PZE_101128150	104.266
294	PZE_101130820	104.409
295	PZE_101132310	104.484
296	PZE_101130533	104.541
297	PZE_101133204	104.844
298	PZA02135_2	104.933
299	bnlg2204	105.409
300	bnlg1458	105.988
301	csu145(pck)	106.15
302	PZE_101134523	106.152
303	PZE_101135433	106.481
304	PZE_101135589	106.686
305	PZE_101136154	106.864
306	umc1021	107.093
307	umc2096	107.492
308	PZE_101137544	107.492
309	PZE_101138093	107.609
310	PZE_101138790	108.166
311	umc1177~umc1270	109.086
312	PZE_101139638	109.488
313	PZE_101139952	109.634
314	PHM3147_18	110.201
315	PZE_101140619	110.378
316	PZE_101140277	110.419
317	PZA02191_1	110.591
318	PZE_101141959	111.349
319	pza02737	111.383
320	PZE_101141819	112.168
321	PHM1968_22	112.635
322	PZE_101142488	112.86
323	gpm405	112.958
324	PHM5622_21	113.53
325	PZE_101143217	113.552
326	pzb01062	113.557
327	pza02114	114.338
328	PZE_101144216	115.082
329	PZE_101144248	115.475
330	PZE_101144427	115.628
331	PZE_101144895	116.042
332	PHM17698_8	116.126
333	PZE_101144838	116.461
334	PZE_101145302	116.695
335	PZE_101145417	116.857
336	PZE_101145494	116.967
337	pco094039	117.158
338	umc2090	117.737
339	PZE_101147229	118.08
340	phi001	118.437
341	phi109275	118.488
342	umc1880	118.488
343	pco083348	118.552
344	bnlg1866	118.788
345	PZE_101147651	119.289
346	bnlg1590	119.719
347	PZE_101148449	120.498
348	PZE_101149139	120.862
349	PHM5727_5	121.133
350	IDP1411	121.803
351	pza03189	123.641
352	csu145c(pck)	124.355
353	PZE_101151184	124.497
354	PZE_101151522	125.457
355	bnlg2238	125.688
356	umc2124	125.688
357	rpl3	126.692
358	PZE_101151991	126.849
359	PZE_101152541	127.086
360	PZA00619_3	127.505
361	PZE_101152052	127.734
362	asg45	127.848
363	PZE_101153556	128.381
364	umc8a	128.4
365	umc1169	129.288
366	PZE_101154578	130.664
367	PZE_101154189	130.961
368	umc1917	131.288
369	PZE_101154881	131.311
370	PZE_101155681	132.277
371	PZE_101155708	132.555
372	PZE_101156601	133.362
373	PZE_101157038	134.448
374	umc2227	134.488
375	PZE_101158547	135.009
376	umc167a	135.309
377	PZE_101161094	135.849
378	bnlg1811	135.888
379	PZE_101158959	136.054
380	PZE_101159230	136.33
381	csu61	136.807
382	PZE_101159556	137.015
383	pza00752	137.13
384	PZE_101159305	137.669
385	PZE_101159840	137.681
386	PZA01963_15	139.198
387	pco071369	139.772
388	PZE_101161883	139.826
389	PZE_101162447	141.056
390	PZE_101163518	141.784
391	umc2228	141.788
392	PZE_101163233	141.941
393	PZE_101163046	142.454
394	PZE_101163755	142.574
395	PZE_101163953	142.734
396	asg30	142.879
397	PZE_101164237	143.227
398	S535_1	143.463
399	pza03240	144.257
400	PZE_101165483	145.035
401	pza03465	145.274
402	umc2112	145.688
403	bnlg2086	145.688
404	bnlg2295	145.688
405	umc2229	145.688
406	PZE_101166754	147.385
407	pzb01235	148.325
408	PZE_101169494	149.617
409	bnlg1884	149.631
410	PHM12706_14	150.59
411	PZE_101169867	150.755
412	PZE_101169539	150.82
413	umc2025	151.088
414	PZE_101170476	151.398
415	PZE_101170828	152.133
416	pza01254	152.146
417	umc1515	152.488
418	PZE_101171300	152.725
419	PZE_101171655	153.413
420	PZE_101172239	154.164
421	PZE_101173330	156.077
422	PZE_101173927	156.346
423	AY109678	156.918
424	PHM3690_23	157.152
425	PZE_101175283	157.584
426	PZA00369_1	157.626
427	PZE_101177112	158.253
428	PZE_101176809	158.981
429	umc1493	159.088
430	umc1461	159.088
431	umc1676	159.088
432	umc1076	159.088
433	umc1703	159.088
434	umc2231	159.088
435	umc2230	159.088
436	PZE_101178021	159.109
437	cl13018_1	159.6
438	PHM5484_22	160.108
439	PZE_101178467	160.601
440	pza03200	160.828
441	PZE_101178662	161.31
442	PHM12693_8	162.252
443	PZE_101178657	162.824
444	PZA00403_5	163.693
445	umc1906	164.288
446	umc1395	164.888
447	umc1601	164.888
448	umc1903	164.888
449	umc2233	164.888
450	umc2232	164.888
451	PZE_101179591	164.956
452	pco066796	164.996
453	PZA00658_19	165.488
454	PZE_101180803	165.593
455	umc1971	166.043
456	umc1603	166.288
457	umc1321	166.288
458	PHM4942_12	167.477
459	PZE_101182606	167.512
460	PZE_101182771	167.75
461	PHM2478_22	168.182
462	PZE_101183799	170.583
463	PZE_101185029	171.211
464	PZE_101185810	171.535
465	PZE_101186140	171.751
466	PZE_101186294	172.613
467	PZE_101186723	172.663
468	PZE_101186536	172.722
469	PZE_101187674	173.467
470	PHM13405_8	173.749
471	umc1972	173.888
472	PZE_101188920	174.145
473	PZE_101189231	174.756
474	PZE_101189600	175.15
475	PZE_101190037	175.467
476	PZE_101189834	175.552
477	PZE_101190568	176.317
478	PHM4992_10	177.223
479	umc1812	178.588
480	PZE_101194070	178.934
481	PZE_101193867	179.878
482	PHM4926_16	180.307
483	PZE_101194703	180.45
484	PZE_101194502	180.52
485	PZE_101195479	180.75
486	PZE_101195407	181.036
487	umc1508	181.581
488	umc1590	181.688
489	PZE_101196709	182.002
490	PZE_101196242	182.201
491	PZE_101197699	183.565
492	umc1811	184.788
493	bnlg2057	184.788
494	umc2234	184.788
495	phm1968	184.937
496	BC603_1000	184.974
497	PZE_101198633	185.27
498	umc67	185.437
499	PZE_101203754	186.102
500	PZE_101198848	186.682
501	PZE_101199324	186.899
502	umc67a	187.472
503	PZE_101199858	187.499
504	pza03531	187.508
505	pza00068	187.616
506	bnlg1598	187.688
507	umc1123	187.688
508	PZE_101199859	188.2
509	PM01_000014T	189.62
510	csu61b	189.732
511	PZE_101200344	189.876
512	PZE_101201288	191.071
513	PZE_101201940	191.777
514	PZE_101201219	192.461
515	PZE_101206289	195.621
516	umc1919	196.788
517	BC351_1500	197.259
518	PZE_101205964	197.587
519	PZE_101206740	197.991
520	PZE_101207166	198.112
521	PZE_101205714	198.488
522	umc1396	198.688
523	bnlg1057	198.688
524	umc2235	198.688
525	umc1335	199.329
526	PHM14475_7	199.663
527	PZE_101207892	199.788
528	PZE_101208074	199.988
529	PZE_101208775	200.63
530	glb1_2	201.042
531	umc1748	201.088
532	umc58	202.216
533	PZE_101210179	202.975
534	PZE_101210110	203.088
535	PZE_101210761	203.322
536	PZE_101210734	203.464
537	PHM5526_25	204.707
538	PZE_101213558	205.368
539	PZE_101213233	205.403
540	PZE_101215024	206.905
541	PZE_101215279	207.989
542	PZE_101215826	208.553
543	umc1035	208.788
544	umc1709	208.788
545	bnlg1615	208.788
546	PZE_101216412	209.098
547	PZA00364_2	209.609
548	PZE_101218765	210.6
549	PZE_101217941	210.723
550	PZE_101218966	211.269
551	BC373_650	212.265
552	PZE_101220149	212.34
553	umc1924	212.488
554	S1_272220818	212.815
555	PZE_101221649	212.949
556	PZE_101222142	213.205
557	PZE_101222687	213.608
558	PZE_101222779	213.935
559	PZE_101224534	214.228
560	PZE_101225496	214.485
561	pza02467	214.646
562	PZE_101226363	215.285
563	umc2236	215.288
564	PZE_101227493	215.876
565	umc1925	216.388
566	umc2237	216.388
567	asg62	216.463
568	PZE_101228874	216.504
569	PZE_101229026	217.267
570	PZE_101229904	217.36
571	PZE_101229884	217.747
572	PZE_101230537	217.96
573	PZE_101231477	218.542
574	PZA02204_1	218.545
575	PZE_101231817	219.007
576	bnlg400	219.348
577	PZE_101233287	220.966
578	pco095480	221.204
579	PZE_101233132	221.757
580	PHM595_30	222.837
581	PZE_101234638	223.147
582	umc2239	223.188
583	bnl7.08a	223.231
584	PZE_101234718	223.249
585	PZA02957_5	223.354
586	PZE_101235826	223.67
587	umc33a	223.762
588	pco095461	223.833
589	pza00131	223.868
590	PHM720_29	224.136
591	PZE_101236380	224.272
592	PZE_101236600	224.422
593	umc1661	225.247
594	PZE_101237390	225.683
595	PHM18705_23	226.036
596	umc2238	226.088
597	S116_1	226.277
598	PZE_101237912	226.721
599	PZE_101237862	226.871
600	PZE_101240622	228.051
601	PZE_101239143	228.514
602	PZE_101239112	228.674
603	BC308	229.42
604	PZE_101241048	230.34
605	umc23a	230.862
606	umc1122	232.128
607	bnlg615	232.353
608	bnlg1556	232.388
609	umc1358	232.388
610	PZE_101242552	232.972
611	PZE_101244344	233.437
612	PZE_101244646	234.609
613	PZE_101245575	235.158
614	pza03193	235.577
615	cl13108_1a	237.38
616	pco139091	237.469
617	PZE_101246363	237.764
618	PZE_101246842	238.08
619	PHM13191_8	238.212
620	PZA00385_1	238.695					2555.1
621	PZE_101248001	240.944
622	PZA00623_3	241.779
623	PZE_101249157	242.162
624	PZE_101249703	242.326
625	PZA00623_2	242.602
626	PM01_000019H	242.639
627	PZE_101249681	242.708
628	PZE_101250840	244.16
629	PZE_101250560	244.45
630	PZE_101251367	244.711
631	bnlg155	245.194
632	PZA01238_2	245.321
633	PHM174_13	246.635
634	phm6043	247.117
635	PHM1275_22	247.752
636	PZE_101251928	248.677
637	dbf1	248.738
638	pza03741	249.213
639	PHM673_33	249.267
640	PZE_101252072	249.38
641	pza00856_2	250.366
642	bnlg1025	252.088
643	AY110356	252.152
644	umc128	252.209
645	phm4942	252.468
646	umc1278	252.61
647	BC370_2000	253.067
648	PZE_101255156	253.457
649	phm5484	253.848
650	phm15871	253.963
651	pco135045	254.057
652	PHM7616_35	254.084
653	phiv037	254.195
654	PZE_101255854	254.63
655	umc1833	254.638
656	umc49c	255.555
657	umc1128	255.588
658	PZE_101255595	255.966
659	PZE_101256370	256.04
660	PZE_101256470	256.118
661	AY110159	256.234
662	PZE_101256290	256.718
663	umc1147	257.288
664	phi002	258.288
665	phi037	258.288
666	phi038	258.288
667	umc1013	258.288
668	umc1245	258.288
669	csu164	261.218
670	umc1998	265.288
671	bnlg2228	266.388
672	pza00381	266.465
673	umc1955	267.788
674	an1	269.832
675	umc2080	270.188
676	umc1838	272.188
677	umc1446	272.188
678	umc2181	272.188
679	umc114	273.881
680	umc1085	275.818
681	bmc1955	276.12
682	umc1991	285.388
683	umc1383	286.788
684	umc2240	287.888
685	pco124850	290.563
686	umc1914	290.988
687	umc1512	291.588
688	phm16605	296.54
689	umc2047	305.688
690	phi011	305.688
691	phi055	305.688
692	umc107a(croc)	305.691
693	pza02269	305.701
694	S119_1	305.702
695	kip1	305.715
696	umc104c	305.723
697	pco092050	305.727
698	bnlg1331	306.388
699	pza00339	313.797
700	pza01921	314.416
701	umc1431	315.288
702	umc1082	315.288
703	umc72b	316.624
704	umc2189	317.288
705	AY112283	318.159
706	umc204	319.604
707	umc1726	323.188
708	bnl6.29b	324.35
709	tua1	324.363
710	umc2149	324.388
711	bnlg1671	324.388
712	AY110019	325.962
713	npi282b	326.731
714	phi308707	328.488
715	pza02698	328.549
716	S487_4	329.68
717	umc1534	330.232
718	bnlg1347	333.373
719	pza02520	333.783
720	bnl17.18b	334.15
721	cl11011_1	335.712
722	pzb00114	335.744
723	bmc2223	336.564
724	pza02204	336.875
725	pco114964	339.947
726	pza03188	340.892
727	pza02957	343.622
728	pza00978	344.228
729	pco067414	344.346
730	fnr1	344.724
731	phi265454	346.042
732	phm18705	346.096
733	umc161a	346.193
734	pzb01403	346.322
735	umc161	346.797
736	cl8889_1	347.512
737	glb2	347.63
738	pza03305	348.236
739	umc1553	351.388
740	umc1421	352.088
741	bnlg2331	355.1
742	umc1681	355.488
743	phi2654	356.58
744	umc1111	357.588
745	umc1129	357.588
746	umc2241	358.288
747	umc2242	358.688
748	umc1118	359.988
749	umc1707	363.229
750	pza02044	363.474
751	csu134a(thf)	363.601
752	umc1009	368.397
753	umc84a	368.493
754	umc1744	368.588
755	AY109128	368.701
756	AY106825	368.913
757	phi22756	369.101
758	umc1630	369.388
759	AY112175	371.39
760	gpm548a	373.325
761	pco104394	373.89
762	pco060326	374.242
763	pza00343	375.178
764	umc1064	376.164
765	cl27369_1	376.749
766	umc2045	376.988
767	phb4	378.838
768	umc2243	380.688
769	phi227562	380.688
770	phi064	380.688
771	umc1331	380.688
772	bnl6.32	383.125
773	umc163	386.277
774	pza01239	386.679
775	umc1797	388.704
776	umc1819	391.488
777	umc2244	391.488
778	umc1605	391.488
779	umc2100	401.284
780	umc160	404.142
781	bnl8.33	412.374
chr=2
lg=2
782	E81MCAG7	0
783	umc2246	1.7
784	bmc1338	3.38296
785	bnlg1017	3.92467
786	npi239	4.01323
787	bnl10.82b	4.11608
788	umc1227	7.68449
789	umc2094	9.97207
790	phi402893	10.649
791	phi96100	11.2
792	umc2245	11.2
793	PZE_102000441	11.328
794	PZE_102000846	11.949
795	PZE_102000839	12.1249
796	PHM5817_15	12.1249
797	pco137413a	13.1397
798	cl37982_1	13.9917
799	umc1165	16.1
800	PZE_102002492	16.3261
801	cl25041_1a	16.8861
802	PZE_102003236	17.1297
803	PZE_102003235	17.3439
804	cl11096_1	17.4318
805	PM01_00004D5	17.6759
806	cl4178_1	18.1614
807	pco118092	18.1951
808	pza02264	18.2456
809	PHM1511_14	19.1014
810	umc53	19.3528
811	AY109692	19.7586
812	E71MCAG11	20
813	PHM13440.11	20.2956
814	bnlg1297	20.6
815	umc1542	20.6
816	PZE_102005684	20.6157
817	PZE_102006128	21.2425
818	PZE_102006513	22.248
819	pzb01233	22.7826
820	PZE_102007336	23.3053
821	PZE_102007615	23.6728
822	PHM5535_8	24.5564
823	PZA00613_22	24.9783
824	PHM6552_113	25.2965
825	pco082032	26.1305
826	PZE_102009755	26.72
827	umc1980	26.9
828	umc1265	26.9
829	PZE_102009795	27.0235
830	PM01_000033M	28.0403
831	PHM3334_6	28.7126
832	PHM3309.8	29.8384
833	PZA00200_8	30.8849
834	umc1961	30.9
835	mmc0111	31.6
836	umc1823	31.6
837	PHM3309_8	31.6523
838	umc2403	31.9514
839	PZE_102014212	32.4211
840	pza01935_10	34.2107
841	PZA03700_2	36.2296
842	E81MCAC6	37
843	PZE_102018100	37.959
844	PHM12979_9	38.9682
845	pza02208	40.3815
846	ZmRR1	41.7402
847	PZE_102021400	43.1334
848	PZE_102021451	43.1828
849	pza01935	43.6158
850	PZE_102022207	43.8134
851	PHM5822_15	44.1962
852	npi290b	44.236
853	sdg140	45.7884
854	pza03747	46.4513
855	PZE_102025619	47.3914
856	PZE_102026049	47.8556
857	PZE_102041532	48.47
858	PZE_102028065	48.8454
859	umc1756	49.2
860	bnlg2277	49.6
861	PZE_102045819	50.128
862	PZE_102028040	50.3294
863	PZE_102047767	50.858
864	PZE_102029697	51.8118
865	PZA00108.12	51.9693
866	PZE_102040493	51.9707
867	PZE_102029739	52.0118
868	PZA00108_12	52.2315
869	phm5822	52.3056
870	bnlg1327	52.6
871	PZE_102030702	53.4388
872	PZE_102030819	53.5276
873	PHM6111_5	53.6
874	PZE_102043341	53.6
875	PZE_102043277	53.7026
876	pza01753_1	54.2309
877	PZE_102044689	54.3048
878	PZA02337_4	54.3939
879	PZE_102033535	55.259
880	umc1262	55.5
881	PZE_102047571	55.6119
882	cl44168_1	55.732
883	pzb00901	55.9614
884	umc1261	56.2
885	zfl2	56.8173
886	E82MCAC24	56.836
887	umc1422	57.2
888	PZE_102048060	57.277
889	PZE_102046980	57.365
890	PZA02080_1	57.5
891	PHM1962_33	57.5
892	PZE_102039914	58.2089
893	PHM4425_25	58.2151
894	BC203_2000	58.2439
895	PZE_102035734	58.7785
896	PZE_102049009	58.9147
897	PZE_102036053	58.9606
898	PZE_102038546	59.2213
899	PZE_102037541	59.7149
900	umc6a	59.8226
901	PZE_102037264	60.008
902	PZE_102050762	60.2444
903	PZA00497_4	60.3467
904	PZE_102037806	60.9824
905	umc1518	61.0045
906	PZE_102051157	61.1422
907	PZE_102050935	61.3862
908	AY106040	61.46
909	PZE_102051933	62.6953
910	PZE_102043638	62.8089
911	PHM4586_12	62.9842
912	PZE_102052725	63.5659
913	umc6	63.9256
914	cl61573_1	64.187
915	PZA02058_1	64.9924
916	PZE_102053822	65.4952
917	PZE_102053654	65.6435
918	PZE_102055209	65.6808
919	PZE_102054468	65.8431
920	PZA00061_1	65.8596
921	PZE_102056416	66.2783
922	PZE_102058138	66.4596
923	PZE_102056984	66.5086
924	PZE_102058006	66.8861
925	mmc0231	68.2
926	umc1845	68.5732
927	PZE_102059688	68.8649
928	umc1555	69.315
929	umc44b	70.1239
930	php20608	70.2611
931	PZE_102061118	70.4299
932	PZE_102061320	70.6436
933	PZE_102061615	71.0729
934	PZE_102062683	71.2436
935	E82MCAC4	71.5073
936	PZE_102062050	71.6084
937	PZE_102062629	71.9128
938	PHM10404_8	71.9348
939	PZE_102062962	71.9879
940	BC578_1800	72.3391
941	sdg104	72.9591
942	PZE_102065811	73.0902
943	bnlg125	73.0934
944	npi287a	73.8408
945	PZE_102067552	74.3887
946	PZE_102067907	74.6833
947	PZE_102066476	74.8296
948	PZE_102070496	74.9236
949	bnlg108_646	74.9299
950	PZE_0006607533	75.4938
951	PZE_102069907	75.6141
952	PZE_102071375	75.7573
953	PZE_102069908	75.8316
954	PZE_102071145	75.8996
955	PZE_102072914	76.1667
956	umc57	76.3084
957	PZE_102075990	76.6
958	PZE_102074542	76.7874
959	PZE_102077128	77.2667
960	PZE_102076654	77.2965
961	PZE_102076812	77.4978
962	pza03228	78.7095
963	PZE_102077620	78.9006
964	pza00497	78.9656
965	PZE_102080019	79.6327
966	PZE_102079812	79.9625
967	PZE_102082133	80.4531
968	PZE_102082835	80.4936
969	PHM3457_6	80.7676
970	PZE_102082838	80.8104
971	bnlg2248	80.8948
972	PHM10321_11	80.9558
973	PZE_102080478	81.3327
974	PZE_102084461	81.9719
975	PZE_102084750	82.259
976	PZE_102086050	82.3731
977	PZE_102085154	82.5028
978	PZE_102085416	82.5218
979	PZE_102087125	82.5399
980	PZE_102088058	82.6811
981	PZE_103094688	82.6949
982	PZE_102087526	82.7498
983	PZE_102092948	82.8301
984	PZE_102088558	82.8349
985	PZE_102090752	83.0288
986	PZE_102090176	83.1028
987	PZE_102089051	83.1028
988	PZE_102089752	83.2286
989	PZE_102093482	83.2611
990	PZE_102098071	83.28
991	PZE_102091834	83.3374
992	PZE_102100073	83.435
993	PZE_102091035	83.4414
994	PZE_102100964	83.4735
995	PZE_102101316	83.4739
996	PZE_102101624	83.58
997	PZE_102100871	83.617
998	PZA00485_2	83.6899
999	PZE_102100460	83.7533
1000	PZE_102096469	83.8755
1001	PZE_102094583	83.8811
1002	PZE_102102239	83.9062
1003	PHM13360_13	83.9422
1004	PZE_102096215	84.0089
1005	PZE_102104129	84.3721
1006	PZA02966.11	84.4089
1007	PZE_102102981	84.46
1008	PZE_102104318	84.4688
1009	PZE_102104155	84.4824
1010	PM01_000054V	84.5583
1011	PZE_102105564	84.6749
1012	PZE_102105806	84.845
1013	PZE_102106394	84.8495
1014	PZE_102106504	85.0074
1015	PZE_102107035	85.1575
1016	PZE_102107631	85.3154
1017	PZE_102108296	85.5127
1018	PZE_102109182	85.6252
1019	PZE_102109861	85.9063
1020	PZE_102111172	86.147
1021	PZE_102110466	86.1859
1022	PZE_102111257	86.8981
1023	PZE_102110333	86.9546
1024	PZE_102112161	87.0747
1025	PZE_102112686	87.1894
1026	PZE_102112249	87.2033
1027	PZE_102112805	87.2616
1028	PHM13648_11	87.3039
1029	E82MCTC2	87.4422
1030	PZE_102113762	87.645
1031	PZE_102113760	87.7362
1032	PZE_102114559	88.3554
1033	PZA01280.2	88.6994
1034	PM01_0000338	89.0212
1035	PZA01280_2	89.1333
1036	AY107034	89.5556
1037	PZE_102116295	89.9981
1038	PZE_102116447	90.3855
1039	PZE_102116344	90.5675
1040	PZE_102116675	90.5796
1041	S2_153128978	90.7779
1042	PZE_102117667	91.9669
1043	PZE_102118767	92.1596
1044	PZA02939_10	92.8485
1045	PZE_102120321	93.2045
1046	PZE_102121137	93.5374
1047	PZE_102120959	93.7164
1048	PZE_102121940	93.7184
1049	pza01321_1	93.8593
1050	PZE_102121608	94.5141
1051	PZE_102122877	95.0043
1052	PHM635_23	95.4369
1053	PZE_102123089	95.8567
1054	PZE_102123500	95.9949
1055	PZE02171586552	96.1887
1056	PZA00637_4	96.4166
1057	PZE02171591935	96.7887
1058	PZE_102126512	97.9072
1059	bnlg1064	98.1
1060	PZE_102127730	99.3736
1061	csu81(ank)	99.3892
1062	pza03659_1	99.395
1063	umc1024	99.4
1064	phi109642	99.4
1065	bnlg381	99.4
1066	pza01879	99.4091
1067	BC126_1200	99.419
1068	pza03142	99.4243
1069	php20725	99.429
1070	umc2247	100.1
1071	AY112119	100.495
1072	pza02279	101.33
1073	AY110266	101.522
1074	PZE_102129854	101.838
1075	umc1459	101.936
1076	AY103944	102.548
1077	PZE_102129070	102.708
1078	pza01755	103.071
1079	csu4a	103.455
1080	csu50	103.807
1081	sdg102a	103.85
1082	pza01993	104.146
1083	umc1783	104.693
1084	bnlg2328	105.31
1085	umc1541	105.7
1086	umc1465	105.7
1087	umc1448	105.7
1088	pza02378	106.015
1089	umc2248	106.1
1090	umc1326	106.1
1091	pza02168	106.326
1092	PZE_102131631	106.855
1093	phi083	109.6
1094	umc2249	110.3
1095	umc2251	110.3
1096	bnlg1175	110.3
1097	bnlg1018	110.3
1098	umc1580	110.3
1099	AY104214	110.302
1100	PZE_102132760	111.731
1101	pco137050	111.79
1102	PZE_102133503	112.706
1103	umc1065	113.288
1104	pzb00183	114.072
1105	PZE_102134204	114.179
1106	bnlg371	115.183
1107	IDP267	115.306
1108	bnlg108	116.5
1109	umc1259	116.5
1110	csu133	116.755
1111	pza01820	117.547
1112	trpinh	117.569
1113	umc2079	117.6
1114	umc2030	117.6
1115	umc2088	117.6
1116	umc1861	117.6
1117	umc1485	117.6
1118	PZE_102135972	118.358
1119	PZE_102137574	120.71
1120	pza00755_2	121.604
1121	PZE_102137862	122.104
1122	umc2125	122.7
1123	umc2250	122.7
1124	PZE_102140630	124.658
1125	S2_187449158	125.149
1126	S2_188872782	126.543
1127	umc8b	127.164
1128	umc1185	127.747
1129	PZE_102141929	128.171
1130	AY111877	128.848
1131	pco061840b	128.878
1132	umc1635	129
1133	umc1454	129
1134	umc1581	129
1135	csu54a	129.009
1136	cl26752_1	129.777
1137	mmc0401	129.8
1138	umc1028	129.8
1139	umc255	130.086
1140	pco084268	130.678
1141	pco128954a	130.863
1142	umc55a	131.147
1143	umc2252	131.2
1144	umc2110	131.2
1145	pza02939	131.394
1146	pco123957	132.257
1147	pza01902	132.358
1148	bnlg1783	132.473
1149	pza02465	132.788
1150	umc1079	133.1
1151	bnlg1831	133.1
1152	nc003	133.515
1153	csu13	133.721
1154	phm4880	133.746
1155	cl803_1	133.928
1156	bnlg1036	134
1157	PZE_102142740	134.048
1158	pza02549	134.339
1159	PZA02890.4	134.599
1160	PZE_102143943	135.76
1161	PZA02890_4	135.76
1162	sdg119	135.859
1163	PZE_102144438	136.796
1164	bmc1018	136.883
1165	umc1080	137.1
1166	umc1875	137.1
1167	umc14b	137.377
1168	umc5a	137.718
1169	PZE_102144397	137.937
1170	umc2178	138
1171	umc2253	138
1172	umc1658	138
1173	umc2254	138.9
1174	umc1923	138.9
1175	bnlg1138	138.9
1176	umc1004	138.9
1177	PZE_102145703	139.166
1178	umc1637	139.393
1179	PZE_102146058	139.534
1180	umc1755	139.6
1181	PZE_102146070	139.684
1182	PHM4196_27	140.196
1183	PZE_102147076	140.597
1184	pza03184	141.061
1185	PZE_102148280	141.481
1186	PZE_102178232	142.633
1187	M0271	142.865
1188	PHM499_19	143.346
1189	PHM3055_9	143.832
1190	S2_195711367	144.263
1191	PZE_102148927	144.612
1192	PZE_102149655	145.125
1193	umc1108	145.4
1194	mmc0271	145.463
1195	PZE_102149810	145.555
1196	PM01_00005T3	145.935
1197	PZE_102150762	146.282
1198	PZE_102151305	146.79
1199	umc2129	146.8
1200	PZE_102151356	146.873
1201	PZE_102152004	147.107
1202	PZE_102152286	147.485
1203	PHM7953_11	147.511
1204	PHM3668_12	147.532
1205	PHM7953.11	147.754
1206	PZE_102155387	147.812
1207	PZE_102153944	148.047
1208	PZE_102155428	148.057
1209	PZA02731_1	148.063
1210	PHM14412_4	148.073
1211	PZE_102154009	148.846
1212	umc1890	149.3
1213	PZE_102156050	149.786
1214	PZE_102156633	150.825
1215	PZE_102159951	151.217
1216	PZE_102160834	151.23
1217	PZE_102153048	151.481
1218	pza03529	151.579
1219	PZA03165_1	152.545
1220	PHM2773_30	153.412
1221	PZE_102163261	153.752
1222	phi127	155.044
1223	bmc1036	155.479
1224	PZE_102165529	155.565
1225	PZE_102165687	155.812
1226	PZE_102161136	156.271
1227	AY109917	156.488
1228	pza00824	158.269
1229	bnlg2144	158.881
1230	PZE_102166542	159.652
1231	PZE_102166543	160.18
1232	PZE_102166741	160.244
1233	PZA02964_7	160.539
1234	phm7953	160.989
1235	pza02456_1	161.273
1236	pza02731	161.316
1237	asg20	163.345
1238	bnlg2077	163.7
1239	PZE_102168018	163.975
1240	IDP364	164.034
1241	umc1049	164.2
1242	umc1560	164.2
1243	bnlg1662	164.427
1244	PZE_102169510	165.775
1245	umc125a	165.96
1246	PZE_102170920	166.229
1247	PZE_102169535	166.44
1248	pza02077	167.786
1249	PZE_102172025	168.697
1250	PZE_102171277	168.944
1251	bnlg198	169.365
1252	gpm863	170.507
1253	umc4a	170.878
1254	PZE_102175032	172.293
1255	umc1526	172.423
1256	PZE_102175223	172.71
1257	pza02418_2	173.003
1258	PZE_102176300	173.713
1259	PZE_102172713	173.818
1260	PZE_102176758	174.045
1261	PZE_102177071	174.622
1262	umc1042	174.884
1263	PZE_102177131	175.567
1264	bnlg1233	176.9
1265	pza02012_7	177.212
1266	PZE_102179558	178.383
1267	umc1947	178.8
1268	ham101	178.97
1269	PZE_102180077	179.232
1270	bnlg1316	179.8
1271	umc1604	179.8
1272	pza02456	180.47
1273	PZA00163_4	180.752
1274	PZE_102181292	181.096
1275	npi249	181.557
1276	PZE_102181478	181.725
1277	pza00804	181.949
1278	PZE_102182307	182.356
1279	cl41475_1	183.114
1280	bnl8.44b	183.234
1281	PZE_102182802	183.773
1282	pza02471	184.099
1283	pza02418	184.273
1284	PZE_102183628	185.024
1285	PZE_102184104	186.204
1286	PZE_102184995	186.932
1287	umc1633	187
1288	PZE_102185458	187.469
1289	BC203_700	187.762
1290	bmc1267	188.221
1291	PZE_102186665	189.234
1292	PZA02727_1	190.256
1293	bnlg1606	191.191
1294	PM01_0000156	191.216
1295	umc150b	191.958
1296	PZE_102187687	192.152
1297	PZE_102187385	192.341
1298	PZE_102187906	192.953
1299	umc31b	193.123
1300	PZE_102188267	193.945
1301	mmc0381	194.3
1302	PZE_102188421	194.573
1303	bnlg1746	194.7
1304	cl1288_1a	195.163
1305	PZE_102189186	195.625
1306	PZE_102189414	196.677
1307	PZE_102189702	197.309
1308	bnlg1940	197.5
1309	umc1516	198.5
1310	pco061004	198.905
1311	pza02564	199.548
1312	PZA02170_1	199.649
1313	PZE_102191781	199.945
1314	pzb01013	201.031
1315	PHM3094_23	201.469
1316	PZE_102191900	201.759
1317	pzd00022_5	204.769
1318	pza02266	205.491
1319	pza01895	206.702
1320	PZE_102193394	206.759
1321	pza01352	208.907
1322	pza02727	209.692
1323	csu64a(grf)	210.139
1324	umc1252	213.1
1325	umc1256	213.1
1326	umc1551	213.931
1327	bnlg1520	215.73
1328	csu109a	218.097
1329	bmc1335	222.318
1330	umc36a	223.671
1331	bnlg469	230.6
1332	bnlg1893	230.6
1333	AY110389	231.208
1334	zmm31	236.97
1335	umc2184	238.9
1336	bmc1520	254.1
1337	umc2214	289.8
1338	phi10104	293.572
1339	bnlg1696	307.333
chr=3
lg=3
1340	E71MCAC6	0
1341	umc2101	0
1342	umc2105	0
1343	umc2104	0
1344	umc2103	0
1345	umc2102	0
1346	umc2109	0
1347	umc2108	0
1348	umc2107	0
1349	umc2106	0
1350	umc2118	0
1351	umc1931	2.1
1352	umc1746	2.1
1353	PZE_103001291	3.08592
1354	PZE_103001622	3.37184
1355	umc2255	3.6
1356	umc1780	3.6
1357	umc32a	4.42781
1358	umc1793	5.33754
1359	pco113418	6.61627
1360	PZE_103003116	8.54727
1361	umc1394	9.5
1362	umc2256	10.4
1363	PZE0302745685	11.0492
1364	PZE_103005351	11.6789
1365	phi45312	11.6852
1366	umc121	11.6951
1367	cl19880_1	11.7938
1368	S3_2812544	12.1947
1369	umc1970	12.6
1370	umc2071	13.1
1371	umc2257	13.1
1372	umc1892	14
1373	PZE_103005595	14.5439
1374	umc2049	18.1
1375	PZA02090_1	19.9789
1376	E81MCAT7	24
1377	phi10412	26.2755
1378	PZE_103008756	27.141
1379	umc1458	28.6
1380	csu32	28.6672
1381	PHM12859_7	28.7931
1382	PZE_103009843	28.9889
1383	PZE_103010389	29.6401
1384	cl40794_1	30.8417
1385	PZE_103011490	30.9184
1386	cl5882_1	31.1305
1387	pza03527_1	31.7011
1388	PZE_103062648	32.387
1389	PZE_103061576	32.616
1390	PZE_103063833	32.621
1391	PZE_103064200	32.7211
1392	PZE_103065361	32.8655
1393	pza03527	32.9862
1394	PZE_103068739	33.016
1395	PZE_103013135	33.9157
1396	pza03212	34.08
1397	PZE_103063232	34.1505
1398	PZE_103013405	34.1556
1399	bnlg1523	34.1831
1400	umc1886	34.2
1401	bnlg1144	34.2
1402	pza00749_1	34.3272
1403	PZE_103060872	34.4545
1404	pza00749	34.5138
1405	umc2048	34.785
1406	PZE_103068012	34.9944
1407	PZA00627_1	35.0528
1408	PZE_103054685	35.1471
1409	PZE_103071667	35.3584
1410	PZE_103057464	35.4023
1411	PZE_103055453	35.4319
1412	PZE_103066053	35.4616
1413	PHM15475_27	35.4873
1414	PZE_103014171	35.4913
1415	PZE_103062484	35.6142
1416	PZE_103014248	35.8338
1417	PZE_103059709	36.0094
1418	PZE_103067889	36.1293
1419	PZE_103059015	36.1614
1420	PZA02134_3	36.2045
1421	PZE_103055220	36.2135
1422	PZE_103054575	36.297
1423	PZE_103057424	36.387
1424	PZE_103015388	36.8664
1425	PHM7417_21	37.5314
1426	PZE_103069689	37.6091
1427	PZE_103069221	37.7855
1428	PZE_103015786	37.9012
1429	pzb01944	37.9227
1430	PZE_103069222	37.967
1431	PZE_103053909	38.0491
1432	PZE_103015618	38.3949
1433	PZE_103070612	38.5786
1434	PZE_103073496	38.581
1435	PZE_103070266	38.5841
1436	PZE_103015842	38.6017
1437	PZE_103072196	38.7814
1438	PZE_103065281	38.8421
1439	cl20454_1a	39.5266
1440	PZE_103071053	39.5273
1441	PZE_103074652	39.9178
1442	PHM2324_23	40.4292
1443	PM01_00004EP	40.6087
1444	PZE_103074199	40.7858
1445	PZA02589.1	41.1087
1446	PZA00627.1	41.1087
1447	PZE_103075872	41.5627
1448	bnlg1325	41.7688
1449	umc1057	42.2
1450	PZE_103017599	42.2501
1451	PZE_103017577	42.4296
1452	PZE_103076372	43.083
1453	PZA02589_1	43.1278
1454	PZE_103074559	43.6998
1455	E81MCAT2	43.836
1456	PZE_103076996	44.0948
1457	bnlg1647	44.2
1458	PZE_103075454	44.4134
1459	PZE_103077429	44.4465
1460	PHM4204_69	44.5048
1461	PZE_103018049	44.508
1462	PZE_103018970	45.0248
1463	PZE_103019130	45.1993
1464	PZE_103019324	45.3728
1465	PZA00508_2	45.9776
1466	pco120183	46.9626
1467	PZE_103020134	47.4776
1468	PZE_103021324	48.4153
1469	PHM15449_10	48.5101
1470	PZE_103048707	48.6585
1471	PZE_103079483	49.2087
1472	PZE_103078702	49.4705
1473	bnlg1904	49.7127
1474	PZE_103078297	49.9286
1475	PZE_103021174	50.0756
1476	csu16	50.0788
1477	PZE_103022830	50.1064
1478	PZE_103080303	50.7766
1479	PZE_103022202	50.8183
1480	PZE_103023690	51.0194
1481	PZE_103023379	51.2018
1482	PZE_103025361	51.3806
1483	PZE_103025333	51.3936
1484	PZE_103079771	51.5685
1485	PZE_103024934	51.5804
1486	PZA01447_1	51.6801
1487	PZE_103025592	52.1603
1488	PZE_103048210	52.1801
1489	PZE_103026250	52.3975
1490	PZE_103024938	52.4261
1491	PZE_103081189	52.8712
1492	PZE_103025888	53.426
1493	PM01_0000572	53.8832
1494	PZE_103027778	54.023
1495	PZE_103030194	54.1972
1496	PZE_103028869	54.3435
1497	PZE_103081689	54.8536
1498	PZE_103030995	55.2756
1499	PZE_103031323	55.591
1500	PZE_103082105	55.6649
1501	PZE_103032194	55.8486
1502	PZE_103032158	55.9356
1503	PZE_103031668	56.0483
1504	PZE_103033509	56.3965
1505	phm4204	56.6529
1506	PHM2343.25	56.7847
1507	PZE_103034530	56.9163
1508	PHM2343_25	57.2149
1509	PZA02255_2	57.2983
1510	umc2259	57.4
1511	umc2258	57.4
1512	bnlg1447	57.4
1513	PZE_103035524	57.4538
1514	phi374118	57.5369
1515	PZE_103037289	57.6018
1516	PZE_103037641	57.7115
1517	PZE_103039677	57.8212
1518	PZE_103037370	57.9309
1519	PZE_103082924	58.1233
1520	PHM13823_7	58.1373
1521	PZE_103044102	58.1478
1522	PZE_103047477	58.2951
1523	PZE_103040550	58.3996
1524	PZE_103046475	58.451
1525	PZE_103042957	58.5171
1526	PZE_103044842	58.869
1527	PZE_103083575	58.9814
1528	PZE_103044317	59.051
1529	PZE_103083874	59.3244
1530	PZE_103085447	59.8745
1531	PZE_103084543	59.8954
1532	PZE_103085906	60.8612
1533	PZE03142269142	62.3488
1534	PZE_103086306	63.4012
1535	PZE_103086575	63.8718
1536	PZE_103086917	64.2682
1537	PZE_103087007	64.7569
1538	PZE_103088477	66.9324
1539	PZE_103087157	67.6693
1540	PZE_103088324	67.6796
1541	PHM1745_16	68.0702
1542	pza00920_1	70.2269
1543	PZE_103090457	71.339
1544	PZE_103089589	71.4114
1545	E81MCAT6	73.3875
1546	bnlg2136	75.6976
1547	umc1030	75.7
1548	phi036	75.7
1549	umc1012	75.7
1550	pco081323	76.6335
1551	PZE_103090601	77.5
1552	PZE_103090563	77.7
1553	PZE_103091230	78.0079
1554	umc50a	78.2723
1555	PZE_103092434	78.2729
1556	umc2000	78.5
1557	phi243966	78.5
1558	umc1772	78.5
1559	umc1425	78.5
1560	umc1729	78.5
1561	umc1608	78.5
1562	PZE_103091994	78.6285
1563	PZE_103091108	78.7
1564	umc10a	78.8938
1565	bnlg602	79.8832
1566	pza00265	80.1222
1567	umc1087	80.1819
1568	PZE_103092933	80.5
1569	umc1361	80.6553
1570	phi37411	80.6803
1571	PZE_103096615	81.7646
1572	PZA00827_1	81.8841
1573	PZE_103097004	81.9234
1574	PZA00827.1	82.5532
1575	PZE_103098233	83.1836
1576	PHM13420_11	83.2532
1577	umc2033	83.5
1578	PZE_103098625	83.7992
1579	PZE_103098664	83.8584
1580	umc2158	83.9
1581	umc1392	83.9
1582	umc1495	83.9
1583	PZB02179_1	84.6796
1584	PZE_103099719	85.9084
1585	PZE_103100160	86.4068
1586	PHM9914_11	86.7397
1587	AY107193	87.4466
1588	nc030	87.5047
1589	umc1025	87.675
1590	PZE_103101164	87.9572
1591	PZE_103100061	88.1095
1592	phi029	88.4968
1593	PZE_103102727	89.7083
1594	PZE_103103387	89.8221
1595	PZA00667_1	89.8456
1596	pzb21	89.8932
1597	umc92a	89.8985
1598	bnlg1452	89.9
1599	bnlg1113	89.9
1600	umc1742	89.9
1601	umc1717	89.9
1602	bnlg1019	89.9
1603	umc2117	89.9
1604	phm13823	89.9036
1605	dupss5	89.9068
1606	pza03119	89.9096
1607	lg3	89.9128
1608	PZE_103102170	90.1145
1609	PZE_103102501	90.2501
1610	PZE_103102840	90.4243
1611	PZE_103102712	90.6201
1612	umc1655	91.3
1613	pza00707	91.3365
1614	PZE_103104448	91.6702
1615	PZE_103104752	92.019
1616	PZE_103104806	92.3843
1617	pza01396_1	92.5047
1618	umc0312	93.6368
1619	PZE_103106481	93.8337
1620	mmc0132	94.4
1621	pza00279	94.634
1622	bnl13.05b	95.1412
1623	PZE_103108109	95.2618
1624	umc2262	95.5
1625	umc2261	95.5
1626	mmc0312	95.5
1627	umc1908	95.5
1628	PZE_103108877	95.9149
1629	PHM1959_26	97.5402
1630	PZE_103109729	97.8214
1631	PZE_103109587	97.8676
1632	umc2263	98.3
1633	PZE_103110416	98.5315
1634	PZE_103110761	98.9364
1635	pza02402_1	99.1223
1636	umc1504	100
1637	pza02619	100.553
1638	umc18a(psaN)	101.006
1639	PZE_103112780	101.126
1640	umc2264	101.3
1641	umc1968	101.3
1642	umc1683	101.3
1643	umc1307	101.808
1644	csu29b	102.219
1645	umc1449	102.3
1646	PZE_103117610	102.654
1647	BC603_850	102.761
1648	pza03198	102.767
1649	phm15449	103.243
1650	umc1773	103.7
1651	umc1527	103.7
1652	bnlg1462	103.992
1653	PZE_103117006	104.151
1654	umc1223	104.284
1655	bnlg420	104.379
1656	pza00413	104.505
1657	phi053	105.035
1658	PZE_103119151	105.118
1659	zag2	105.146
1660	bnl1606a	105.16
1661	umc2002	105.3
1662	PZE_103120875	105.814
1663	mmc022	105.866
1664	cl5290_1	106.166
1665	umc1174	106.5
1666	bnlg1035	106.5
1667	umc1600	106.5
1668	bnlg1601	106.5
1669	umc1693	106.5
1670	umc1102	106.5
1671	S3_179511489	106.748
1672	S3_179735110	107.436
1673	PHM17210_5	107.791
1674	PZA02654_3	108.34
1675	PZE_103123325	108.709
1676	PZE_103122966	108.832
1677	PZE_103123615	109.684
1678	PZE_103123019	109.696
1679	phm4955	109.802
1680	pza00827	109.813
1681	PZE_103123844	109.904
1682	PZE_103124738	110.322
1683	PZE_103125004	110.458
1684	crr5	110.952
1685	PZE_103125956	111.024
1686	PZE_103125672	111.204
1687	PZE_103125763	111.245
1688	PZE_103126743	111.44
1689	pza01934	111.441
1690	PZE_103127374	111.492
1691	PZE_103128060	111.531
1692	PZE_103129362	111.696
1693	PZE_103128464	111.722
1694	PZE_103129514	111.733
1695	PZA00099_6	111.815
1696	PZE_103132216	111.861
1697	PZE_103130978	111.866
1698	pza00494_2	111.903
1699	PZE_103132991	112.066
1700	PZE_103132492	112.174
1701	PZE_103133286	112.258
1702	PZE_103133859	112.338
1703	PZE_103133175	112.368
1704	PZE_103135771	112.667
1705	PZE_103135938	112.79
1706	PZA01359_1	112.83
1707	PM01_0000211	112.904
1708	PHM13673_53	112.983
1709	PZE_103138177	113.015
1710	PZE_103137894	113.042
1711	PZE_103139040	113.236
1712	PZE_103138646	113.468
1713	pzb02122	113.51
1714	PZE_103139833	113.623
1715	PZA02952_10	113.682
1716	mmc0022	114
1717	umc2020	114
1718	umc1167	114
1719	umc1501	114
1720	PZE_103140670	114.241
1721	pza02474	114.309
1722	PZE_103140944	114.422
1723	umc2127	115.32
1724	PZE_103142398	115.365
1725	PZE_103144282	115.443
1726	PZE_103143590	115.638
1727	PZE_103145531	116.013
1728	S3_200187159	116.107
1729	PZE_103147126	117.46
1730	PZE_103146956	117.509
1731	PZE_103147211	117.708
1732	PHM2919_23	117.733
1733	PZA00892_5	118.141
1734	PZE03200206675	118.301
1735	PZE_103148470	118.524
1736	PZA03011.6	118.747
1737	PZE_103148727	118.824
1738	PZE_103150197	119.786
1739	pco081085	119.811
1740	PZE_103150079	120.219
1741	PZE_103150095	120.644
1742	PZE_103151098	120.818
1743	PZE_103151399	121.572
1744	PHM9672_9	122.359
1745	PZE_103154277	122.93
1746	PZE_103154125	123.016
1747	PZE_103155594	124.226
1748	PZE_103155390	124.35
1749	pza00828	124.808
1750	PZE_103156524	125.376
1751	PZE_103157525	125.818
1752	PHM8828_7	126.25
1753	PZE_103156977	126.25
1754	PZA02516_1	126.354
1755	PZE_103159374	126.448
1756	PHM3352_19	126.739
1757	mmc0251	127.472
1758	pzb02179	128.038
1759	PZE_103159691	128.376
1760	PZE_103159840	128.41
1761	PZE_103160229	128.622
1762	PZA02616_1	129.479
1763	PZE_103162566	131.256
1764	PZE_103163478	131.313
1765	PZE_103164978	132.595
1766	umc1973	132.8
1767	phm2885	133.883
1768	pza01396	133.89
1769	bnlg1449	133.89
1770	pza03073	133.892
1771	bnl5.37	133.893
1772	umc1539	133.9
1773	umc1311	133.9
1774	pza00667	133.904
1775	PZE_103165542	134.026
1776	bnl5.37b	134.06
1777	PZE_103165697	134.313
1778	zmm16	134.784
1779	PHM13742.5	135.579
1780	PZE_103167997	136.564
1781	pza03032	137.04
1782	umc1730	137.3
1783	umc1027	137.3
1784	PZE_103169263	137.454
1785	PZE_103169160	137.496
1786	pza00783	138.138
1787	PM01_000053G	139.192
1788	S3_217808747	139.203
1789	asg48	139.367
1790	PHM3342_31	139.518
1791	S3_217808798	139.649
1792	PZE_103171593	141.66
1793	PZE_103171255	141.671
1794	PZA02824_4	141.834
1795	pza01726	141.909
1796	PZE_103171398	142.045
1797	umc1798	142.162
1798	PZE_103172250	142.22
1799	PZE_103172593	142.84
1800	umc2166	142.98
1801	PZE_103174030	145.797
1802	umc1266	146.1
1803	PZE_103174950	146.774
1804	bnlg1063	146.905
1805	PHM2672_19	147.014
1806	umc2266	147.3
1807	bnl8.01	147.451
1808	PZE_103175463	147.835
1809	PZE_103175677	149.408
1810	PZA00402_1	150.564
1811	PZA00234_19	151.013
1812	umc2267	151.5
1813	phi102228	151.5
1814	PZE_103176922	151.692
1815	bnlg1047	151.866
1816	PZE_103177974	152.883
1817	PZE_103178060	153.113
1818	PZE_103178597	153.362
1819	PZE_103179078	155.404
1820	umc2268	155.5
1821	phi10228	155.551
1822	cl35759_1a	155.781
1823	pza01962	155.919
1824	PHM3852_15	156.221
1825	phm17210	156.53
1826	phi10222	157.027
1827	PZE_103181288	157.533
1828	PZE_103181174	157.601
1829	PZA00143_5	157.692
1830	PZA00143.5	157.773
1831	PZE_103182399	159.316
1832	PZE_103182400	160.108
1833	PZE_103183476	161.772
1834	PZE_103183662	161.896
1835	PZE_103184341	162.523
1836	PZE_103182817	162.534
1837	bnlg1350	162.791
1838	PZE_103184446	162.834
1839	umc1644	164.3
1840	PZE_103185177	165.414
1841	phm1675	165.534
1842	PZE_103185158	165.719
1843	umc2269	166.5
1844	bnlg1951	166.5
1845	PZA00088_3	166.971
1846	PZE_103185889	167.627
1847	PZE_103186258	167.907
1848	PHM13174_18	168.667
1849	bnlg1160	169.5
1850	rz444b	169.684
1851	umc2271	169.8
1852	umc2270	169.8
1853	PZA02423_1	170.167
1854	bnl5.37a	170.258
1855	Txp196L	170.626
1856	phm13673	170.988
1857	pza03744	170.988
1858	pza03743	170.988
1859	pco067132	171.016
1860	hmt4	171.416
1861	bnl6.16	174.326
1862	pza03255	174.423
1863	umc102	174.627
1864	bnl6.16a	174.965
1865	mmc071	175.422
1866	gpm649	176.488
1867	pzb01109	176.488
1868	pza01035	176.61
1869	csu38a(taf)	176.856
1870	bnlg197	177.2
1871	pco093951	178.155
1872	csu96a(psei)	178.436
1873	Txp218L	178.565
1874	pzb27	180.231
1875	phi046	180.232
1876	umc1499	181.081
1877	umc3b	182.237
1878	umc2050	182.5
1879	cl23834_1	182.736
1880	umc2274	183.191
1881	umc1767	183.7
1882	umc1135	183.7
1883	pco143484	185.043
1884	umc2272	188
1885	umc1399	188
1886	umc1528	188
1887	bnlg1605	188
1888	AY104511	190.693
1889	umc1404	195
1890	umc1489	195
1891	pza03154	197.172
1892	umc2273	197.9
1893	bmc1605	198.172
1894	umc1844	201.323
1895	bnlg1844	201.745
1896	umc17a	203.144
1897	umc1825	203.6
1898	bnl15.20	205.488
1899	bmc1108	209.39
1900	umc2275	216.8
1901	umc1140	216.8
1902	pza00538	217.675
1903	umc1915	220.3
1904	bnlg1108	220.3
1905	bnlg1182	222.669
1906	pza02516	223.21
1907	umc1273	223.9
1908	umc2081	223.9
1909	cl26679_1	224.4
1910	umc1320	224.9
1911	umc1062	230.423
1912	umc63	233.619
1913	bnlg1536	234.597
1914	umc1639	238.382
1915	phm2423	238.449
1916	umc2152	240.6
1917	umc17	241.238
1918	pza03146	241.709
1919	pco096827	241.937
1920	AY111254	242.474
1921	csu36c(rpL19)	242.932
1922	bnlg1257	243.333
1923	umc2008	244
1924	cl39004_1	244.072
1925	umc63a	244.378
1926	pco122073	244.539
1927	csu25a(P450)	244.61
1928	umc2277	244.7
1929	umc1813	244.7
1930	umc65	244.727
1931	pza02514	245.142
1932	pza03391	246.054
1933	umc1136	246.673
1934	phm2672	247.211
1935	umc1578	247.732
1936	bnlg1754	249.4
1937	phi047	251
1938	bnlg1496	251
1939	umc96	252.59
1940	pza00402	252.989
1941	pza02182	261.677
1942	umc1641	263.5
1943	csu58a	263.915
1944	pza01360	267.595
1945	pza00316	271.012
1946	umc1594	271.7
1947	pza01688	272.395
chr=4
lg=4
1948	E71MCAA4	0
1949	pic18	0
1950	csu221	1.12547
1951	umc2278	1.8
1952	umc1164	2.30916
1953	bnlg1434	2.6
1954	phi072	2.6
1955	umc1008	2.6
1956	umc2279	3.9
1957	nc135	3.9
1958	umc1228	3.9
1959	PZE_104005468	4.15583
1960	PZE_104005416	4.32956
1961	umc123	4.58279
1962	PZE_104005482	5.7159
1963	PZE_104002900	11.2513
1964	PZE_104002805	11.7377
1965	PHM1971_20	11.9112
1966	bx4	12.7965
1967	PHM1184_26	14.1304
1968	PZE_104003542	14.6
1969	PZE_104003895	15.582
1970	umc1682	17.7249
1971	E71MCAA5	18
1972	phm2438	19.4025
1973	php20725	20.1495
1974	umc1669	20.5354
1975	E71MCAA6	22.9248
1976	umc1276	24.2361
1977	PHM3963_33	25.9349
1978	PZE_104008253	26.2609
1979	PZE_104008414	26.4621
1980	PHM3301_28	26.7052
1981	PZE_104008503	26.7494
1982	PZA00436_7	29.0694
1983	PZE_104009396	29.1992
1984	phi074	29.8711
1985	phm3301	29.9248
1986	PZE_104009638	30.0519
1987	phi295450	30.5
1988	umc1757	30.5
1989	umc1759	30.5
1990	E71MCAA8	30.9884
1991	PZE_104011339	33.891
[truncated: 3,044 more rows]
