# Supplementary material for: Comprehensive meta-analysis of QTL and gene expression studies identify candidate genes associated with Aspergillus flavus resistance in maize
Source: Front Plant Sci. 2023 Jul 18;14:1214907. doi: 10.3389/fpls.2023.1214907 (PMC10392829; doi:10.3389/fpls.2023.1214907)
Supplement: Supplementary file 6 [file Table_5.xlsx]

## Sheet: Sheet1
Supplementary Table S5. Candidate Aspergillus flvus resistance genes identified in MQTL intervals in maize
Biomercator Genes								3384 Genes common between MQTL intervals and Musungu et al (2020)	591 (256+335) genes putatively present in A. flavus-resonsive gene data
MQTL	GeneID	B73 v4	B73 V5	NCBI ID	Annotations	Chrommosome	# genes	AC155496.2_FG009	256 from RNA-seq	335 from microarray	51 genes with expression 1.0≤ Log2Fc ≥1.0; P ≤0.05	43 genes common between 591 Aspergillus flavus specific genes and 3384 genes
MQTL1.01	AC213668.4_FG007		Zm00001eb012500			1	207	AC159612.1_FG007	Zm00001d001921	Zm00001d017748	Zm00001d013944	Zm00001d030855
MQTL1.01	AC213668.4_FG008					2	645	AC182413.4_FG002	Zm00001d002057	Zm00001d030305	Zm00001d015532	Zm00001d023758
MQTL1.01	AC233935.1_FG005	Zm00001d028625	Zm00001eb012440	100501071	uncharacterized protein LOC100501071	3	379	AC183413.3_FG006	Zm00001d002777	Zm00001d014575	Zm00001d015717	Zm00001d000004
MQTL1.01	GRMZM2G043857	Zm00001d028649	Zm00001eb012560			4	613	AC183932.3_FG007	Zm00001d002818	Zm00001d009292	Zm00001d017838	Zm00001d024442
MQTL1.01	GRMZM2G043878	Zm00001d028651	Zm00001eb012570			5	1197	AC183944.4_FG003	Zm00001d003080	Zm00001d024659	Zm00001d017970	Zm00001d025672
MQTL1.01	GRMZM2G043976					6	72	AC184133.3_FG001	Zm00001d003219	Zm00001d019274	Zm00001d019564	Zm00001d025776
MQTL1.01	GRMZM2G044027	Zm00001d028653	Zm00001eb012580	100191862	dTDP-glucose dehydratase homolog csu219	7	141	AC184169.3_FG001	Zm00001d003324	Zm00001d039430	Zm00001d024442	Zm00001d025651
MQTL1.01	GRMZM2G044237	Zm00001d028662	Zm00001eb012670	100383335	arginine biosynthesis bifunctional protein ArgJ, chloroplastic	8	142	AC184836.3_FG002	Zm00001d003419	Zm00001d019265	Zm00001d028701	Zm00001d025685
MQTL1.01	GRMZM2G044281	Zm00001d028654	Zm00001eb012590			9	444	AC185254.4_FG002	Zm00001d003579	Zm00001d025672	Zm00001d050279	Zm00001d025805
MQTL1.01	GRMZM2G048154	Zm00001d028667	Zm00001eb012700	103634472	zinc finger protein ZAT12	10	412	AC185628.3_FG010	Zm00001d003635	Zm00001d003869	Zm00001d003579	Zm00001d003488
MQTL1.01	GRMZM2G048482	Zm00001d028643	Zm00001eb012540	100281384	uncharacterized protein LOC100281384			AC185656.3_FG002	Zm00001d003964	Zm00001d041908	Zm00001d004130	Zm00001d003677
MQTL1.01	GRMZM2G077797	Zm00001d028661	Zm00001eb012660	100283990	RNA binding protein			AC186013.3_FG001	Zm00001d004129	Zm00001d041935	Zm00001d004454	Zm00001d003664
MQTL1.01	GRMZM2G078052	Zm00001d028660	Zm00001eb012650	100279211	uncharacterized protein LOC100279211			AC186145.3_FG002	Zm00001d004130	Zm00001d009532	Zm00001d004994	Zm00001d004927
MQTL1.01	GRMZM2G096231	Zm00001d028642	Zm00001eb012530					AC187222.4_FG001	Zm00001d004419	Zm00001d049608	Zm00001d005942	Zm00001d004797
MQTL1.01	GRMZM2G096261	Zm00001d028641						AC187279.3_FG004	Zm00001d004454	Zm00001d025776	Zm00001d007657	Zm00001d040408
MQTL1.01	GRMZM2G119886	Zm00001d028656	Zm00001eb012610	103634469	probable ADP-ribosylation factor GTPase-activating protein AGD6			AC187879.3_FG001	Zm00001d004797	Zm00001d014110	Zm00001d007828	Zm00001d040506
MQTL1.01	GRMZM2G145275	Zm00001d028639	Zm00001eb012510					AC189879.3_FG003	Zm00001d004938	Zm00001d029347	Zm00001d010735	Zm00001d041403
MQTL1.01	GRMZM2G150697	Zm00001d028665	Zm00001eb012690	100278585	uncharacterized protein LOC100278585			AC190565.2_FG003	Zm00001d004994	Zm00001d017385	Zm00001d011072	Zm00001d041822
MQTL1.01	GRMZM2G150729	Zm00001d028664	Zm00001eb012680	100272342	uncharacterized protein LOC100272342			AC190630.2_FG001	Zm00001d005063	Zm00001d000004	Zm00001d011118	Zm00001d049476
MQTL1.01	GRMZM2G157329	Zm00001d028655	Zm00001eb012600	100279524	THO complex subunit 4			AC190701.3_FG001	Zm00001d005404	Zm00001d029733	Zm00001d012873	Zm00001d049516
MQTL1.01	GRMZM2G171232	Zm00001d028668	Zm00001eb012710					AC190772.4_FG011	Zm00001d005942	Zm00001d041870	Zm00001d013562	Zm00001d049776
MQTL1.01	GRMZM2G172574	Zm00001d028647	Zm00001eb012550	100280456	uncharacterized protein LOC100280456			AC190909.3_FG004	Zm00001d006067	Zm00001d015493	Zm00001d014846	Zm00001d050279
MQTL1.01	GRMZM2G343778							AC190922.3_FG007	Zm00001d006735	Zm00001d025651	Zm00001d015335	Zm00001d050270
MQTL1.01	GRMZM2G345330	Zm00001d028654	Zm00001eb012590					AC191048.2_FG006	Zm00001d007657	Zm00001d040286	Zm00001d015437	Zm00001d013246
MQTL1.01	GRMZM2G401769	Zm00001d028671	Zm00001eb012760					AC191070.3_FG006	Zm00001d007710	Zm00001d017946	Zm00001d016741	Zm00001d013170
MQTL1.01	GRMZM2G428391	Zm00001d028630	Zm00001eb012470	100281806	heat shock cognate 70 kDa protein 2			AC191251.3_FG005	Zm00001d007717	Zm00001d003488	Zm00001d018396	Zm00001d013155
MQTL1.01	GRMZM2G428410	Zm00001d028631	Zm00001eb012480					AC191548.3_FG005	Zm00001d007725	Zm00001d009387	Zm00001d018970	Zm00001d014110
MQTL1.01	GRMZM2G441827							AC191551.3_FG003	Zm00001d007828	Zm00001d013170	Zm00001d019342	Zm00001d014846
MQTL1.01	GRMZM2G471904	Zm00001d028669	Zm00001eb012720	103634473	125 kDa kinesin-related protein			AC191564.3_FG003	Zm00001d007919	Zm00001d017532	Zm00001d020342	Zm00001d014802
MQTL1.01	GRMZM2G471904	Zm00001d028669	Zm00001eb012740					AC191771.3_FG008	Zm00001d008579	Zm00001d017765	Zm00001d024092	Zm00001d015594
MQTL1.01	GRMZM2G471904	Zm00001d028670	Zm00001eb012740					AC191782.3_FG001	Zm00001d008598	Zm00001d013246	Zm00001d026088	Zm00001d015588
MQTL1.01	GRMZM2G471904	Zm00001d028669	Zm00001eb012750					AC191961.3_FG009	Zm00001d008650	Zm00001d014521	Zm00001d026220	Zm00001d015717
MQTL1.01	GRMZM2G471904	Zm00001d028670	Zm00001eb012750					AC193319.3_FG004	Zm00001d008668	Zm00001d010034	Zm00001d027705	Zm00001d017748
MQTL1.01	GRMZM5G801409	Zm00001d028622	Zm00001eb012410	100192516	uncharacterized protein LOC100192516			AC194101.3_FG001	Zm00001d009113	Zm00001d010036	Zm00001d028455	Zm00001d017532
MQTL1.01	GRMZM5G801409	Zm00001d028622	Zm00001eb012420					AC194103.3_FG006	Zm00001d009629	Zm00001d010050	Zm00001d031195	Zm00001d017765
MQTL1.01	GRMZM5G843781							AC194163.3_FG003	Zm00001d009650	Zm00001d008553	Zm00001d031900	Zm00001d017838
MQTL1.01	GRMZM5G891990	Zm00001d028623	Zm00001eb012430					AC194591.2_FG005	Zm00001d009732	Zm00001d029719	Zm00001d032255	Zm00001d019274
MQTL1.01	GRMZM5G894709	Zm00001d028627						AC194852.3_FG007	Zm00001d010267	Zm00001d003664	Zm00001d032915	Zm00001d019265
MQTL1.02	AC213048.3_FG002							AC195058.3_FG003	Zm00001d010327	Zm00001d040311	Zm00001d034265	Zm00001d019564
MQTL1.02	GRMZM2G003530	Zm00001d029417	Zm00001eb019220	100278656	P-loop containing nucleoside triphosphate hydrolase superfamily protein			AC195168.2_FG004	Zm00001d010367	Zm00001d040408	Zm00001d036191	Zm00001d019570
MQTL1.02	GRMZM2G009435	Zm00001d029449	Zm00001eb019480					AC195340.3_FG002	Zm00001d010591	Zm00001d040763	Zm00001d036446	Zm00001d008939
MQTL1.02	GRMZM2G009435	Zm00001d029451	Zm00001eb019490					AC195340.3_FG004	Zm00001d010734	Zm00001d041403	Zm00001d039087	Zm00001d046479
MQTL1.02	GRMZM2G009435	Zm00001d029451	Zm00001eb019490					AC195340.3_FG005	Zm00001d010735	Zm00001d049599	Zm00001d039934	Zm00001d046407
MQTL1.02	GRMZM2G009435	Zm00001d029449	Zm00001eb019500					AC195367.3_FG001	Zm00001d010750	Zm00001d003677	Zm00001d040925
MQTL1.02	GRMZM2G009435	Zm00001d029451	Zm00001eb019500					AC196202.3_FG007	Zm00001d011072	Zm00001d015597	Zm00001d044680
MQTL1.02	GRMZM2G022061	Zm00001d029426	Zm00001eb019290	100279962	uncharacterized protein LOC100279962			AC196431.2_FG001	Zm00001d011118	Zm00001d038624	Zm00001d045768
MQTL1.02	GRMZM2G031591	Zm00001d029424	Zm00001eb019280	100278465	uncharacterized protein LOC100278465			AC196432.3_FG007	Zm00001d011173	Zm00001d020591	Zm00001d047722
MQTL1.02	GRMZM2G046480	Zm00001d029432	Zm00001eb019340	103636002	vacuolar cation/proton exchanger 2 isoform X1			AC196475.3_FG005	Zm00001d011257	Zm00001d048806	Zm00001d048107
MQTL1.02	GRMZM2G048324	Zm00001d029457	Zm00001eb019530					AC196575.3_FG007	Zm00001d011277	Zm00001d041671	Zm00001d048624
MQTL1.02	GRMZM2G049070	Zm00001d029438	Zm00001eb019370					AC197047.3_FG001	Zm00001d011911	Zm00001d050133	Zm00001d049776
MQTL1.02	GRMZM2G051879	Zm00001d029394	Zm00001eb018990	100192746	uncharacterized protein LOC100192746			AC197150.3_FG003	Zm00001d012095	Zm00001d033580
MQTL1.02	GRMZM2G051879	Zm00001d029394	Zm00001eb018990	100194139	uncharacterized protein LOC100194139			AC197355.3_FG001	Zm00001d012172	Zm00001d010797
MQTL1.02	GRMZM2G051879	Zm00001d029394	Zm00001eb018990	103627323	histone H3.3			AC197377.3_FG001	Zm00001d012290	Zm00001d002843
MQTL1.02	GRMZM2G051879	Zm00001d029394	Zm00001eb018990	103638137	histone H3.3			AC197377.3_FG004	Zm00001d012363	Zm00001d029631
MQTL1.02	GRMZM2G056151	Zm00001d029395	Zm00001eb019000					AC197771.3_FG001	Zm00001d012873	Zm00001d023718
MQTL1.02	GRMZM2G056151	Zm00001d029395	Zm00001eb019010					AC198019.2_FG004	Zm00001d013155	Zm00001d042231
MQTL1.02	GRMZM2G062320	Zm00001d029413	Zm00001eb019180					AC198122.3_FG002	Zm00001d013418	Zm00001d049476
MQTL1.02	GRMZM2G062996	Zm00001d029441	Zm00001eb019380					AC198208.3_FG002	Zm00001d013484	Zm00001d008939
MQTL1.02	GRMZM2G070462							AC198382.3_FG001	Zm00001d013562	Zm00001d016394
MQTL1.02	GRMZM2G071688	Zm00001d029461	Zm00001eb019580	100193674	uncharacterized protein LOC100193674			AC198506.3_FG001	Zm00001d013600	Zm00001d032943
MQTL1.02	GRMZM2G071688	Zm00001d029462	Zm00001eb019580	100193674	uncharacterized protein LOC100193674			AC198699.3_FG004	Zm00001d013944	Zm00001d042580
MQTL1.02	GRMZM2G077897	Zm00001d029420	Zm00001eb019250	100194103	uncharacterized protein LOC100194103			AC198901.4_FG004	Zm00001d014345	Zm00001d038610
MQTL1.02	GRMZM2G077960	Zm00001d029419	Zm00001eb019240	100384560	putative protein phosphatase 2C family protein			AC198937.4_FG003	Zm00001d014429	Zm00001d028143
MQTL1.02	GRMZM2G077991	Zm00001d029418	Zm00001eb019230	100284994	60S ribosomal protein L37-like			AC198937.4_FG005	Zm00001d014556	Zm00001d046651
MQTL1.02	GRMZM2G082836	Zm00001d029408	Zm00001eb019130					AC199058.2_FG001	Zm00001d014802	Zm00001d032178
MQTL1.02	GRMZM2G085825	Zm00001d029435	Zm00001eb019350					AC199325.3_FG005	Zm00001d014846	Zm00001d008320
MQTL1.02	GRMZM2G090018	Zm00001d029396	Zm00001eb019030	100272586	Os10g0351100-like protein			AC199335.3_FG002	Zm00001d015042	Zm00001d019035
MQTL1.02	GRMZM2G090018	Zm00001d029396	Zm00001eb019040					AC199911.5_FG001	Zm00001d015044	Zm00001d036238
MQTL1.02	GRMZM2G095384							AC199956.4_FG003	Zm00001d015063	Zm00001d036036
MQTL1.02	GRMZM2G095411	Zm00001d029444	Zm00001eb019440	100280925	uncharacterized protein LOC100280925 isoform 2			AC200099.4_FG006	Zm00001d015171	Zm00001d022303
MQTL1.02	GRMZM2G106834	Zm00001d029403						AC200112.4_FG008	Zm00001d015252	Zm00001d037091
MQTL1.02	GRMZM2G110027	Zm00001d029475	Zm00001eb019650	100217250	uncharacterized protein LOC100217250			AC200122.4_FG004	Zm00001d015282	Zm00001d012120
MQTL1.02	GRMZM2G110067	Zm00001d029474	Zm00001eb019640	103636180				AC200178.2_FG003	Zm00001d015335	Zm00001d002938
MQTL1.02	GRMZM2G110076	Zm00001d029473	Zm00001eb019630	100191949	transcription initiation factor TFIID subunit 9B			AC200234.3_FG006	Zm00001d015437	Zm00001d033108
MQTL1.02	GRMZM2G111208	Zm00001d029443	Zm00001eb019420	103636073	1-phosphatidylinositol-3-phosphate 5-kinase FAB1B			AC200739.5_FG001	Zm00001d015532	Zm00001d023540
MQTL1.02	GRMZM2G117222	Zm00001d029455	Zm00001eb019520					AC201891.3_FG001	Zm00001d015588	Zm00001d011487
MQTL1.02	GRMZM2G117513	Zm00001d029448	Zm00001eb019470	100276585	uncharacterized protein LOC100276585			AC202391.4_FG002	Zm00001d015717	Zm00001d048920
MQTL1.02	GRMZM2G120587	Zm00001d029410	Zm00001eb019160	100280301	uncharacterized protein LOC100280301 precursor			AC203027.3_FG003	Zm00001d015848	Zm00001d037736
MQTL1.02	GRMZM2G123776	Zm00001d029459	Zm00001eb019550	100191960	uncharacterized protein LOC100191960			AC203257.2_FG003	Zm00001d016055	Zm00001d016834
MQTL1.02	GRMZM2G123872							AC203324.3_FG008	Zm00001d016064	Zm00001d042169
MQTL1.02	GRMZM2G139878	Zm00001d029464	Zm00001eb019600					AC203804.4_FG008	Zm00001d016104	Zm00001d048649
MQTL1.02	GRMZM2G142352	Zm00001d029466	Zm00001eb019610					AC203841.3_FG002	Zm00001d016377	Zm00001d013502
MQTL1.02	GRMZM2G142390	Zm00001d029468	Zm00001eb019620	103636168	serine/threonine-protein kinase RIPK			AC203841.3_FG009	Zm00001d016419	Zm00001d018876
MQTL1.02	GRMZM2G149224	Zm00001d029454	Zm00001eb019510					AC203909.3_FG003	Zm00001d016617	Zm00001d012475
MQTL1.02	GRMZM2G173030	Zm00001d029422	Zm00001eb019260	100274068	uncharacterized protein LOC100274068			AC203909.3_FG006	Zm00001d016741	Zm00001d013448
MQTL1.02	GRMZM2G179789	Zm00001d029398	Zm00001eb019060					AC203909.3_FG007	Zm00001d017188	Zm00001d029858
MQTL1.02	GRMZM2G179789	Zm00001d029400	Zm00001eb019060					AC203976.4_FG001	Zm00001d017838	Zm00001d045539
MQTL1.02	GRMZM2G179789	Zm00001d029398	Zm00001eb019080					AC203985.4_FG001	Zm00001d017944	Zm00001d038211
MQTL1.02	GRMZM2G179789	Zm00001d029400	Zm00001eb019080					AC203985.4_FG005	Zm00001d017970	Zm00001d011963
MQTL1.02	GRMZM2G179792	Zm00001d029397	Zm00001eb019050	100280265	phospholipase D family protein			AC204252.3_FG001	Zm00001d018396	Zm00001d023290
MQTL1.02	GRMZM2G305400	Zm00001d029407	Zm00001eb019120					AC204690.4_FG005	Zm00001d018671	Zm00001d048824
MQTL1.02	GRMZM2G311656	Zm00001d029437	Zm00001eb019360	103636044	uncharacterized protein LOC103636044			AC204710.4_FG003	Zm00001d018753	Zm00001d026475
MQTL1.02	GRMZM2G340279	Zm00001d029428	Zm00001eb019320					AC204953.3_FG002	Zm00001d018970	Zm00001d029177
MQTL1.02	GRMZM2G340286	Zm00001d029427	Zm00001eb019300	100275916	uncharacterized protein LOC100275916			AC205033.4_FG004	Zm00001d018975	Zm00001d026440
MQTL1.02	GRMZM2G347583	Zm00001d029422	Zm00001eb019260	100274068	uncharacterized protein LOC100274068			AC205057.3_FG002	Zm00001d018987	Zm00001d021544
MQTL1.02	GRMZM2G347808	Zm00001d029429	Zm00001eb019330	100277845	uncharacterized protein LOC100277845			AC205057.3_FG004	Zm00001d019132	Zm00001d016512
MQTL1.02	GRMZM2G352708							AC205077.3_FG003	Zm00001d019174	Zm00001d015934
MQTL1.02	GRMZM2G382717	Zm00001d029409	Zm00001eb019140	100276130	uncharacterized protein LOC100276130			AC205154.3_FG001	Zm00001d019176	Zm00001d014205
MQTL1.02	GRMZM2G382774		Zm00001eb019700	100281645	uncharacterized protein LOC100281645			AC205154.3_FG005	Zm00001d019187	Zm00001d041822
MQTL1.02	GRMZM2G382774		Zm00001eb019710					AC205376.4_FG003	Zm00001d019336	Zm00001d035680
MQTL1.02	GRMZM2G412426	Zm00001d029398	Zm00001eb019070					AC205376.4_FG008	Zm00001d019342	Zm00001d045772
MQTL1.02	GRMZM2G412426	Zm00001d029398	Zm00001eb019070					AC205425.3_FG006	Zm00001d019564	Zm00001d022075
MQTL1.02	GRMZM2G412426	Zm00001d029400	Zm00001eb019070					AC205490.4_FG004	Zm00001d019570	Zm00001d037089
MQTL1.02	GRMZM2G412426	Zm00001d029400	Zm00001eb019070					AC205496.3_FG002	Zm00001d019590	Zm00001d024810
MQTL1.02	GRMZM2G412426	Zm00001d029398	Zm00001eb019080					AC205558.3_FG002	Zm00001d020009	Zm00001d037216
MQTL1.02	GRMZM2G412426	Zm00001d029400	Zm00001eb019080					AC205615.4_FG002	Zm00001d020342	Zm00001d032894
MQTL1.02	GRMZM2G412430	Zm00001d029402	Zm00001eb019090	100275478	uncharacterized protein LOC100275478			AC205664.3_FG001	Zm00001d020498	Zm00001d043014
MQTL1.02	GRMZM2G416156	Zm00001d029447	Zm00001eb019460	103636115	FCS-Like Zinc finger 13			AC205833.3_FG002	Zm00001d020978	Zm00001d019446
MQTL1.02	GRMZM2G423413	Zm00001d029458	Zm00001eb019540					AC206611.3_FG003	Zm00001d021010	Zm00001d017140
MQTL1.02	GRMZM2G471240	Zm00001d029412	Zm00001eb019170	103635924	patatin-like protein 1			AC206642.4_FG001	Zm00001d021118	Zm00001d038001
MQTL1.02	GRMZM2G472234	Zm00001d029446	Zm00001eb019450	103636088	uncharacterized protein LOC103636088			AC207107.4_FG001	Zm00001d021302	Zm00001d021289
MQTL1.02	GRMZM2G524711	Zm00001d029461	Zm00001eb019590	100273621	uncharacterized protein LOC100273621			AC207107.4_FG002	Zm00001d021809	Zm00001d038887
MQTL1.02	GRMZM2G524711	Zm00001d029461	Zm00001eb019590	100273621	uncharacterized protein LOC100273621			AC207206.3_FG001	Zm00001d021814	Zm00001d015414
MQTL1.02	GRMZM2G524711	Zm00001d029462	Zm00001eb019590	100273621	uncharacterized protein LOC100273621			AC207225.3_FG003	Zm00001d021830	Zm00001d016505
MQTL1.02	GRMZM2G524711	Zm00001d029462	Zm00001eb019590	100273621	uncharacterized protein LOC100273621			AC207652.3_FG001	Zm00001d021855	Zm00001d016640
MQTL1.02	GRMZM2G703622							AC207890.3_FG002	Zm00001d021889	Zm00001d035443
MQTL1.02	GRMZM2G703624							AC208358.3_FG005	Zm00001d022317	Zm00001d036301
MQTL1.02	GRMZM5G811373	Zm00001d029476	Zm00001eb019660					AC208454.3_FG002	Zm00001d022318	Zm00001d038723
MQTL1.02	GRMZM5G828488	Zm00001d029460	Zm00001eb019570					AC208539.3_FG002	Zm00001d022641	Zm00001d035083
MQTL1.02	GRMZM5G862467	Zm00001d029478	Zm00001eb019680	100384341	uncharacterized protein LOC100384341			AC208826.3_FG004	Zm00001d023401	Zm00001d019030
MQTL1.02	GRMZM5G866758	Zm00001d029416	Zm00001eb019210	100282283	acetyl-CoA acetyltransferase, cytosolic 1			AC208920.3_FG001	Zm00001d023405	Zm00001d028910
MQTL1.03	AC202172.3_FG004	Zm00001d029775	Zm00001eb022350					AC209208.3_FG001	Zm00001d023758	Zm00001d010889
MQTL1.03	GRMZM2G057768	Zm00001d029772	Zm00001eb022330	100280758	Ca2+/calmodulin-dependent protein kinase phosphatase			AC209208.3_FG003	Zm00001d024092	Zm00001d045162
MQTL1.03	GRMZM2G119766	Zm00001d029777	Zm00001eb022380	103637609	protein EXORDIUM-like 5			AC209208.3_FG005	Zm00001d024346	Zm00001d046672
MQTL1.03	GRMZM2G373607	Zm00001d029776	Zm00001eb022360					AC209374.4_FG002	Zm00001d024367	Zm00001d024809
MQTL1.03	GRMZM2G402564	Zm00001d029778	Zm00001eb022390					AC209705.3_FG004	Zm00001d024442	Zm00001d024814
MQTL1.04	GRMZM2G058149	Zm00001d029955	Zm00001eb023740	100279482	uncharacterized protein LOC100279482			AC209877.3_FG002	Zm00001d025039	Zm00001d031861
MQTL1.04	GRMZM2G067257	Zm00001d029958	Zm00001eb023770					AC209898.2_FG004	Zm00001d025368	Zm00001d032381
MQTL1.04	GRMZM2G067257	Zm00001d029959	Zm00001eb023770					AC210013.4_FG002	Zm00001d025685	Zm00001d004363
MQTL1.04	GRMZM2G079031	Zm00001d029938	Zm00001eb023660	103637669	protein ARABIDILLO 1			AC210013.4_FG003	Zm00001d025805	Zm00001d007143
MQTL1.04	GRMZM2G092590	Zm00001d029950	Zm00001eb023730					AC210013.4_FG005	Zm00001d026032	Zm00001d007299
MQTL1.04	GRMZM2G148074	Zm00001d029934	Zm00001eb023620	103637666	homeobox-leucine zipper protein HOX1-like			AC210013.4_FG008	Zm00001d026088	Zm00001d007876
MQTL1.04	GRMZM2G163189	Zm00001d029946	Zm00001eb023690	100381684	protein ROLLING AND ERECT LEAF 2			AC210013.4_FG009	Zm00001d026157	Zm00001d039932
MQTL1.04	GRMZM2G365134	Zm00001d029937	Zm00001eb023650					AC210013.4_FG011	Zm00001d026220	Zm00001d049085
MQTL1.04	GRMZM2G392477	Zm00001d029948	Zm00001eb023710	103637670	serine/threonine-protein kinase D6PK			AC210013.4_FG012	Zm00001d026462	Zm00001d050200
MQTL1.04	GRMZM2G392477	Zm00001d029948	Zm00001eb023720					AC210013.4_FG013	Zm00001d027686	Zm00001d012227
MQTL1.04	GRMZM2G392524	Zm00001d029947	Zm00001eb023700					AC210013.4_FG014	Zm00001d027705	Zm00001d047536
MQTL1.05	AC205077.3_FG003	Zm00001d030106	Zm00001eb024990					AC210013.4_FG016	Zm00001d027945	Zm00001d012222
MQTL1.05	AC205077.3_FG003	Zm00001d030106	Zm00001eb025000					AC210013.4_FG017	Zm00001d028013	Zm00001d046603
MQTL1.05	AC205077.3_FG003	Zm00001d030106	Zm00001eb025010					AC210013.4_FG018	Zm00001d028455	Zm00001d013724
MQTL1.05	AC205558.3_FG002	Zm00001d030096						AC210013.4_FG019	Zm00001d028563	Zm00001d027983
MQTL1.05	GRMZM2G047781	Zm00001d030087	Zm00001eb024850	100276771	uncharacterized protein LOC100276771			AC210035.3_FG002	Zm00001d028701	Zm00001d008627
MQTL1.05	GRMZM2G053079	Zm00001d030091	Zm00001eb024890					AC210593.3_FG001	Zm00001d028767	Zm00001d043719
MQTL1.05	GRMZM2G057466	Zm00001d030108	Zm00001eb025020					AC211403.4_FG005	Zm00001d029671	Zm00001d014456
MQTL1.05	GRMZM2G057690	Zm00001d030101	Zm00001eb024930	103637724	uncharacterized protein LOC103637724			AC211705.3_FG001	Zm00001d029728	Zm00001d006300
MQTL1.05	GRMZM2G068917	Zm00001d030090	Zm00001eb024870	100193580	dihydroflavonol-4-reductase			AC211737.3_FG012	Zm00001d029992	Zm00001d017181
MQTL1.05	GRMZM2G070271	Zm00001d030103	Zm00001eb024960	103637728	probable xyloglucan endotransglucosylase/hydrolase protein 27			AC212187.4_FG001	Zm00001d030015	Zm00001d047728
MQTL1.05	GRMZM2G089147	Zm00001d030109	Zm00001eb025030					AC212227.3_FG006	Zm00001d030047	Zm00001d050162
MQTL1.05	GRMZM2G090500	Zm00001d030094	Zm00001eb024900					AC212354.3_FG002	Zm00001d030055	Zm00001d015342
MQTL1.05	GRMZM2G108904	Zm00001d030088	Zm00001eb024860					AC213398.3_FG007	Zm00001d030312	Zm00001d042446
MQTL1.05	GRMZM2G112769							AC213600.3_FG002	Zm00001d030736	Zm00001d049997
MQTL1.05	GRMZM2G147937							AC213693.3_FG003	Zm00001d030828	Zm00001d002867
MQTL1.05	GRMZM2G157824	Zm00001d030077	Zm00001eb024730					AC214139.3_FG008	Zm00001d030855	Zm00001d049243
MQTL1.05	GRMZM2G157878	Zm00001d030079	Zm00001eb024740	100277622	uncharacterized protein LOC100277622			AC214256.3_FG005	Zm00001d030906	Zm00001d005230
MQTL1.05	GRMZM2G158976	Zm00001d030098	Zm00001eb024920	100272484	uncharacterized protein LOC100272484			AC214438.3_FG002	Zm00001d030974	Zm00001d036692
MQTL1.05	GRMZM2G168987	Zm00001d030076	Zm00001eb024710	100278322	uncharacterized protein LOC100278322			AC214484.3_FG003	Zm00001d031042	Zm00001d005793
MQTL1.05	GRMZM2G437683	Zm00001d030095	Zm00001eb024910					AC214507.3_FG001	Zm00001d031137	Zm00001d028850
MQTL1.05	GRMZM2G456578							AC214753.2_FG002	Zm00001d031195	Zm00001d018971
MQTL1.05	GRMZM2G456603	Zm00001d030080	Zm00001eb024750	100276847	uncharacterized protein LOC100276847			AC215639.3_FG002	Zm00001d031197	Zm00001d042396
MQTL1.05	GRMZM2G456626	Zm00001d030083	Zm00001eb024800	732818	inositol-tetrakisphosphate 1-kinase 1			AC216010.3_FG001	Zm00001d031233	Zm00001d048847
MQTL1.05	GRMZM5G855014	Zm00001d030105	Zm00001eb024970					AC216070.2_FG005	Zm00001d031250	Zm00001d048812
MQTL1.05	GRMZM5G866843	Zm00001d030110	Zm00001eb025040					AC216229.3_FG002	Zm00001d031508	Zm00001d008403
MQTL1.05	GRMZM5G895663							AC216731.3_FG001	Zm00001d031722	Zm00001d048852
MQTL1.06	AC198995.3_FG003							AC217043.3_FG002	Zm00001d031900	Zm00001d027837
MQTL1.06	GRMZM2G377373							AC217121.3_FG007	Zm00001d032023	Zm00001d049473
MQTL1.06	GRMZM2G421934	Zm00001d030176	Zm00001eb025580					AC217811.3_FG002	Zm00001d032202	Zm00001d026062
MQTL1.07	GRMZM2G002515	Zm00001d000055	Zm00001eb026010	103637953	brassinosteroid LRR receptor kinase BRL2			AC217811.3_FG003	Zm00001d032255	Zm00001d002474
MQTL1.07	GRMZM2G015767	Zm00001d000072	Zm00001eb025890	100191452	uncharacterized protein LOC100191452			AC219061.2_FG007	Zm00001d032915	Zm00001d033265
MQTL1.07	GRMZM2G034372	Zm00001d030231						AC219156.3_FG002	Zm00001d033007	Zm00001d039776
MQTL1.07	GRMZM2G048121	Zm00001d000060	Zm00001eb025990	100281854	NAD(P)H-dependent oxidoreductase			AC225176.2_FG003	Zm00001d033008	Zm00001d020586
MQTL1.07	GRMZM2G062944	Zm00001d000065	Zm00001eb025930					AC225191.2_FG002	Zm00001d033219	Zm00001d040568
MQTL1.07	GRMZM2G091782	Zm00001d000061	Zm00001eb025980					AC226227.2_FG003	Zm00001d033740	Zm00001d019357
MQTL1.07	GRMZM2G101576	Zm00001d030234	Zm00001eb025870					AC226227.2_FG004	Zm00001d034265	Zm00001d034506
MQTL1.07	GRMZM2G141491	Zm00001d000071	Zm00001eb025900	542511	protein NRT1/ PTR FAMILY 8.3			AC226227.2_FG005	Zm00001d034266	Zm00001d038630
MQTL1.07	GRMZM2G141526	Zm00001d000070	Zm00001eb025910					AC231425.1_FG006	Zm00001d034483	Zm00001d045157
MQTL1.07	GRMZM2G150327	Zm00001d030232	Zm00001eb025850					AC231752.1_FG002	Zm00001d034499	Zm00001d017078
MQTL1.07	GRMZM2G363310	Zm00001d000066						AC231752.1_FG003	Zm00001d034822	Zm00001d034573
MQTL1.07	GRMZM2G363319	Zm00001d000065	Zm00001eb025930					AC232321.1_FG008	Zm00001d034837	Zm00001d005659
MQTL1.07	GRMZM2G396202	Zm00001d000058						AC233751.1_FG002	Zm00001d035232	Zm00001d048849
MQTL1.07	GRMZM5G811593	Zm00001d030235	Zm00001eb025880	778429	low affinity nitrate transporter			AC233888.1_FG001	Zm00001d035425	Zm00001d013440
MQTL1.07	GRMZM5G826416	Zm00001d030233	Zm00001eb025860					AC233888.1_FG002	Zm00001d035438	Zm00001d005873
MQTL1.08	AC207225.3_FG001							AC233894.1_FG005	Zm00001d035803	Zm00001d008735
MQTL1.08	AC207225.3_FG003	Zm00001d030366	Zm00001eb026880	100382802	uncharacterized protein LOC100382802			AC233900.1_FG002	Zm00001d036191	Zm00001d017285
MQTL1.08	GRMZM2G009624	Zm00001d030359	Zm00001eb026820					AC233935.1_FG005	Zm00001d036192	Zm00001d045765
MQTL1.08	GRMZM2G009655	Zm00001d030357	Zm00001eb026810	103638427	ubiquitin carboxyl-terminal hydrolase 9			AC233949.1_FG004	Zm00001d036374	Zm00001d037802
MQTL1.08	GRMZM2G022634		Zm00001eb026790					AC233960.1_FG002	Zm00001d036446	Zm00001d026434
MQTL1.08	GRMZM2G022804							AC233960.1_FG003	Zm00001d036562	Zm00001d036769
MQTL1.08	GRMZM2G030850	Zm00001d030361	Zm00001eb026840					AC233960.1_FG005	Zm00001d037310	Zm00001d002083
MQTL1.08	GRMZM2G053955							AC233967.1_FG001	Zm00001d037358	Zm00001d025479
MQTL1.08	GRMZM2G076327	Zm00001d030364	Zm00001eb026870	103638452	LOB domain-containing protein 30			AC233967.1_FG002	Zm00001d037467	Zm00001d048629
MQTL1.08	GRMZM2G385236							AC234180.1_FG002	Zm00001d037763	Zm00001d036621
MQTL1.08	GRMZM2G433184	Zm00001d030363	Zm00001eb026860	100282340	disease resistance response protein 206 precursor			AC234524.1_FG005	Zm00001d037890	Zm00001d044585
MQTL1.08	GRMZM2G451856	Zm00001d030366	Zm00001eb026880	100382802	uncharacterized protein LOC100382802			AC235535.1_FG001	Zm00001d037955	Zm00001d020590
MQTL1.08	GRMZM5G818983							AC235548.1_FG002	Zm00001d038116	Zm00001d044080
MQTL1.08	GRMZM5G841827		Zm00001eb026800	100382939	uncharacterized protein LOC100382939			AF546187.1_FG001	Zm00001d038444	Zm00001d028533
MQTL1.09	AC234187.1_FG003							AF546187.1_FG007	Zm00001d038586	Zm00001d045528
MQTL1.09	GRMZM2G028114	Zm00001d030562	Zm00001eb028080					AF546187.1_FG009	Zm00001d038596	Zm00001d013360
MQTL1.09	GRMZM2G028114	Zm00001d030563	Zm00001eb028080					AF546187.1_FG011	Zm00001d038601	Zm00001d032718
MQTL1.09	GRMZM2G028114	Zm00001d030562	Zm00001eb028090					AF546187.1_FG012	Zm00001d038617	Zm00001d006515
MQTL1.09	GRMZM2G028114	Zm00001d030563	Zm00001eb028090					GRMZM2G000076	Zm00001d038748	Zm00001d027556
MQTL1.09	GRMZM2G043477	Zm00001d030566	Zm00001eb028100					GRMZM2G000166	Zm00001d039087	Zm00001d028777
MQTL1.09	GRMZM2G045668	Zm00001d030572	Zm00001eb028110	100273074	uncharacterized protein LOC100273074			GRMZM2G000171	Zm00001d039199	Zm00001d034071
MQTL1.09	GRMZM2G045668	Zm00001d030573	Zm00001eb028110	100273074	uncharacterized protein LOC100273074			GRMZM2G000245	Zm00001d039694	Zm00001d034849
MQTL1.09	GRMZM2G053531	Zm00001d030561	Zm00001eb028060	100303991	wound responsive protein			GRMZM2G000261	Zm00001d039934	Zm00001d043401
MQTL1.09	GRMZM2G053531	Zm00001d030561	Zm00001eb028070					GRMZM2G000271	Zm00001d040096	Zm00001d040555
MQTL1.09	GRMZM2G093020	Zm00001d030577	Zm00001eb028160					GRMZM2G000280	Zm00001d040506	Zm00001d027549
MQTL1.09	GRMZM2G107406	Zm00001d030572	Zm00001eb028110	100273074	uncharacterized protein LOC100273074			GRMZM2G000775	Zm00001d040924	Zm00001d026333
MQTL1.09	GRMZM2G107406	Zm00001d030573	Zm00001eb028110	100273074	uncharacterized protein LOC100273074			GRMZM2G000801	Zm00001d040925	Zm00001d037113
MQTL1.09	GRMZM2G152526	Zm00001d030579	Zm00001eb028170	103639292	heterogeneous nuclear ribonucleoprotein 1-like			GRMZM2G000959	Zm00001d041291	Zm00001d006762
MQTL1.09	GRMZM2G303909	Zm00001d030555	Zm00001eb028010					GRMZM2G001421	Zm00001d041585	Zm00001d025453
MQTL1.09	GRMZM2G449779	Zm00001d030554	Zm00001eb028000	100383838	uncharacterized protein LOC100383838			GRMZM2G001426	Zm00001d041618	Zm00001d016835
MQTL1.09	GRMZM2G455784	Zm00001d030575						GRMZM2G001451	Zm00001d041975	Zm00001d018515
MQTL1.09	GRMZM2G703755							GRMZM2G001454	Zm00001d042171	Zm00001d006457
MQTL1.09	GRMZM5G811095	Zm00001d030556	Zm00001eb028020	100281528	synaptic vesicle 2-related protein			GRMZM2G001500	Zm00001d042200	Zm00001d010944
MQTL1.09	GRMZM5G828630	Zm00001d030557	Zm00001eb028030	100193705	uncharacterized protein LOC100193705			GRMZM2G001755	Zm00001d042226	Zm00001d032396
MQTL1.09	GRMZM5G852911	Zm00001d030574	Zm00001eb028150					GRMZM2G001816	Zm00001d042602	Zm00001d029979
MQTL1.09	GRMZM5G890938	Zm00001d030559	Zm00001eb028040					GRMZM2G001887	Zm00001d042716	Zm00001d016305
MQTL1.09	GRMZM5G890938	Zm00001d030559	Zm00001eb028050					GRMZM2G001889	Zm00001d043057	Zm00001d036904
MQTL1.10	AC195207.2_FG002		Zm00001eb030020					GRMZM2G001915	Zm00001d043186	Zm00001d001869
MQTL1.10	AF546187.1_FG001		Zm00001eb030130	541923	z1D_2; prolamin 19 kDa alpha zein z1D_2 precursor			GRMZM2G002112	Zm00001d043661	Zm00001d004118
MQTL1.10	AF546187.1_FG007	Zm00001d030855	Zm00001eb030160	542652	z1D_4; prolamin 19 kDa alpha zein z1D_4 precursor			GRMZM2G002515	Zm00001d043765	Zm00001d031271
MQTL1.10	AF546187.1_FG009							GRMZM2G002627	Zm00001d044239	Zm00001d021350
MQTL1.10	AF546187.1_FG010							GRMZM2G002756	Zm00001d044354	Zm00001d012893
MQTL1.10	AF546187.1_FG011	Zm00001d030856	Zm00001eb030170					GRMZM2G002824	Zm00001d044680	Zm00001d033021
MQTL1.10	AF546187.1_FG012	Zm00001d030858	Zm00001eb030190					GRMZM2G002830	Zm00001d044824	Zm00001d048432
MQTL1.10	GRMZM2G028036	Zm00001d030846	Zm00001eb030050					GRMZM2G002894	Zm00001d044935	Zm00001d047079
MQTL1.10	GRMZM2G039112	Zm00001d030862	Zm00001eb030240					GRMZM2G003002	Zm00001d044938	Zm00001d029879
MQTL1.10	GRMZM2G039186	Zm00001d030860	Zm00001eb030220	103640492	CSC1-like protein HYP1			GRMZM2G003014	Zm00001d045008	Zm00001d026701
MQTL1.10	GRMZM2G039186	Zm00001d030861	Zm00001eb030220	103640492	CSC1-like protein HYP1			GRMZM2G003022	Zm00001d045016	Zm00001d021806
MQTL1.10	GRMZM2G039238	Zm00001d030859	Zm00001eb030210					GRMZM2G003234	Zm00001d045114	Zm00001d047006
MQTL1.10	GRMZM2G041050	Zm00001d030868	Zm00001eb030300	100279038	nucleobase-ascorbate transporter 3			GRMZM2G003389	Zm00001d045486	Zm00001d042370
MQTL1.10	GRMZM2G041554							GRMZM2G003417	Zm00001d045709	Zm00001d049979
MQTL1.10	GRMZM2G060690	Zm00001d030849	Zm00001eb030090	100280674	cyclin-A2			GRMZM2G003488	Zm00001d045711	Zm00001d012855
MQTL1.10	GRMZM2G075631	Zm00001d030848	Zm00001eb030080					GRMZM2G003530	Zm00001d045768	Zm00001d016748
MQTL1.10	GRMZM2G130755							GRMZM2G003642	Zm00001d046407	Zm00001d035048
MQTL1.10	GRMZM2G132450	Zm00001d030851	Zm00001eb030110	103640488	cytochrome P450 81D11-like			GRMZM2G003662	Zm00001d046479	Zm00001d025291
MQTL1.10	GRMZM2G137293	Zm00001d030867	Zm00001eb030280					GRMZM2G003752	Zm00001d046585	Zm00001d039072
MQTL1.10	GRMZM2G174645	Zm00001d030865						GRMZM2G003754	Zm00001d046639	Zm00001d018392
MQTL1.10	GRMZM2G174645	Zm00001d030866						GRMZM2G003755	Zm00001d046815	Zm00001d043716
MQTL1.10	GRMZM2G304926	Zm00001d030841						GRMZM2G003789	Zm00001d047056	Zm00001d028296
MQTL1.10	GRMZM2G304926	Zm00001d030842						GRMZM2G003814	Zm00001d047215	Zm00001d009220
MQTL1.10	GRMZM2G426125	Zm00001d030850						GRMZM2G003883	Zm00001d047543	Zm00001d010447
MQTL1.10	GRMZM2G476637	Zm00001d030864	Zm00001eb030260	100279869	uncharacterized protein LOC100279869			GRMZM2G003917	Zm00001d047616	Zm00001d006157
MQTL1.10	GRMZM2G546081	Zm00001d030863	Zm00001eb030250					GRMZM2G004090	Zm00001d047722	Zm00001d028528
MQTL1.10	GRMZM2G703783							GRMZM2G004128	Zm00001d048107	Zm00001d031317
MQTL1.10	GRMZM5G824236							GRMZM2G004177	Zm00001d048260	Zm00001d013422
MQTL1.10	GRMZM5G826984							GRMZM2G004290	Zm00001d048396	Zm00001d016208
MQTL1.10	GRMZM5G878732	Zm00001d030843	Zm00001eb030010	100192938	putative RING zinc finger domain superfamily protein			GRMZM2G004356	Zm00001d048401	Zm00001d016693
MQTL10.01	AC190630.2_FG001							GRMZM2G004480	Zm00001d048624	Zm00001d016766
MQTL10.01	AC194103.3_FG006	Zm00001d023758	Zm00001eb409590					GRMZM2G004548	Zm00001d049309	Zm00001d017124
MQTL10.01	AC198208.3_FG002							GRMZM2G004663	Zm00001d049667	Zm00001d017164
MQTL10.01	AC198382.3_FG001		Zm00001eb409860					GRMZM2G004768	Zm00001d049776	Zm00001d018423
MQTL10.01	AC198699.3_FG004	Zm00001d023759	Zm00001eb409600					GRMZM2G004847	Zm00001d050115	Zm00001d017028
MQTL10.01	AC198699.3_FG004	Zm00001d023759	Zm00001eb409610					GRMZM2G004878	Zm00001d050235	Zm00001d035072
MQTL10.01	AC199058.2_FG001		Zm00001eb409780					GRMZM2G004898	Zm00001d050270	Zm00001d035167
MQTL10.01	AC199325.3_FG001							GRMZM2G004955	Zm00001d050279	Zm00001d036266
MQTL10.01	AC199325.3_FG005							GRMZM2G004997		Zm00001d037054
MQTL10.01	AC208649.4_FG003		Zm00001eb409730					GRMZM2G005199		Zm00001d037299
MQTL10.01	AC214139.3_FG008							GRMZM2G005251		Zm00001d038359
MQTL10.01	GRMZM2G001500	Zm00001d023802	Zm00001eb409950					GRMZM2G005253		Zm00001d038672
MQTL10.01	GRMZM2G005947	Zm00001d023784	Zm00001eb409770					GRMZM2G005456		Zm00001d027307
MQTL10.01	GRMZM2G006206	Zm00001d023783						GRMZM2G005516		Zm00001d039017
MQTL10.01	GRMZM2G006287	Zm00001d023781	Zm00001eb409750	100192099	uncharacterized protein LOC100192099			GRMZM2G005592		Zm00001d027376
MQTL10.01	GRMZM2G015238	Zm00001d023749	Zm00001eb409530					GRMZM2G005633		Zm00001d035508
MQTL10.01	GRMZM2G015886	Zm00001d023810	Zm00001eb410030	100216739	uncharacterized protein LOC100216739			GRMZM2G005641		Zm00001d037142
MQTL10.01	GRMZM2G040968	Zm00001d023792	Zm00001eb409850					GRMZM2G005664		Zm00001d037377
MQTL10.01	GRMZM2G040968	Zm00001d023793	Zm00001eb409850					GRMZM2G005771		Zm00001d037411
MQTL10.01	GRMZM2G046238	Zm00001d023740	Zm00001eb409490					GRMZM2G005865		Zm00001d018770
MQTL10.01	GRMZM2G059010	Zm00001d023801	Zm00001eb409930	100191506	uncharacterized protein LOC100191506			GRMZM2G005886		Zm00001d020055
MQTL10.01	GRMZM2G064818	Zm00001d023804	Zm00001eb409980					GRMZM2G005909		Zm00001d020871
MQTL10.01	GRMZM2G068316	Zm00001d023757	Zm00001eb409580	103640914	NAD(P)H-quinone oxidoreductase subunit U, chloroplastic			GRMZM2G005938		Zm00001d021196
MQTL10.01	GRMZM2G068382	Zm00001d023756	Zm00001eb409570					GRMZM2G005939		Zm00001d022443
MQTL10.01	GRMZM2G075283	Zm00001d023811	Zm00001eb410040	100280981	pathogenesis-related protein 10			GRMZM2G005947		Zm00001d020051
MQTL10.01	GRMZM2G081140	Zm00001d023755						GRMZM2G005996		Zm00001d029044
MQTL10.01	GRMZM2G082271	Zm00001d023741	Zm00001eb409500	103640907	alanine--tRNA ligase			GRMZM2G006083		Zm00001d008215
MQTL10.01	GRMZM2G082271	Zm00001d023742	Zm00001eb409500	103640907	alanine--tRNA ligase			GRMZM2G006107		Zm00001d029180
MQTL10.01	GRMZM2G084005	Zm00001d023799	Zm00001eb409910					GRMZM2G006206		Zm00001d009259
MQTL10.01	GRMZM2G084005	Zm00001d023800	Zm00001eb409910					GRMZM2G006216		Zm00001d009395
MQTL10.01	GRMZM2G087531	Zm00001d023797	Zm00001eb409890	103640934	uncharacterized protein LOC103640934 isoform X1			GRMZM2G006246		Zm00001d009925
MQTL10.01	GRMZM2G090626	Zm00001d023760	Zm00001eb409620	541645	chitin synthase homolog 1			GRMZM2G006282		Zm00001d010249
MQTL10.01	GRMZM2G103909	Zm00001d023808	Zm00001eb410020	100284110	fiber protein Fb2			GRMZM2G006287		Zm00001d011064
MQTL10.01	GRMZM2G106177	Zm00001d023774	Zm00001eb409710					GRMZM2G006428		Zm00001d011342
MQTL10.01	GRMZM2G109582	Zm00001d023803	Zm00001eb409970					GRMZM2G006463		Zm00001d011618
MQTL10.01	GRMZM2G113815	Zm00001d023813	Zm00001eb410050					GRMZM2G006468		Zm00001d011712
MQTL10.01	GRMZM2G115579	Zm00001d023762	Zm00001eb409630	100217002	uncharacterized protein LOC100217002			GRMZM2G006507		Zm00001d029504
MQTL10.01	GRMZM2G136563	Zm00001d023738	Zm00001eb409480	100282332	uncharacterized protein LOC100282332			GRMZM2G006765		Zm00001d012282
MQTL10.01	GRMZM2G137510	Zm00001d023736	Zm00001eb409460	100285996	uncharacterized protein LOC100285996			GRMZM2G006948		Zm00001d011048
MQTL10.01	GRMZM2G140737	Zm00001d023738	Zm00001eb409480	100282332	uncharacterized protein LOC100282332			GRMZM2G006953		Zm00001d045031
MQTL10.01	GRMZM2G141948	Zm00001d023796	Zm00001eb409880					GRMZM2G006985		Zm00001d045109
MQTL10.01	GRMZM2G151944	Zm00001d023796	Zm00001eb409880					GRMZM2G007021		Zm00001d045580
MQTL10.01	GRMZM2G152143	Zm00001d023785	Zm00001eb409790					GRMZM2G007063		Zm00001d000181
MQTL10.01	GRMZM2G169240	Zm00001d023768	Zm00001eb409690	103640919	fatty acid desaturase DES2			GRMZM2G007140		Zm00001d047279
MQTL10.01	GRMZM2G169261	Zm00001d023769	Zm00001eb409700	100273207	uncharacterized protein LOC100273207			GRMZM2G007236		Zm00001d047263
MQTL10.01	GRMZM2G181227	Zm00001d023779	Zm00001eb409740	100283469	CHY1			GRMZM2G007260		Zm00001d030916
MQTL10.01	GRMZM2G319262	Zm00001d023753	Zm00001eb409540					GRMZM2G007481		Zm00001d023391
MQTL10.01	GRMZM2G331368	Zm00001d023795	Zm00001eb409870					GRMZM2G007695		Zm00001d024415
MQTL10.01	GRMZM2G335694							GRMZM2G007734		Zm00001d032391
MQTL10.01	GRMZM2G348695		Zm00001eb409960					GRMZM2G007736		Zm00001d025396
MQTL10.01	GRMZM2G404377	Zm00001d023807	Zm00001eb410000					GRMZM2G007867		Zm00001d026132
MQTL10.01	GRMZM2G431157	Zm00001d023788	Zm00001eb409800					GRMZM2G007907		Zm00001d026549
MQTL10.01	GRMZM2G439860	Zm00001d023737	Zm00001eb409470	100278265	uncharacterized protein LOC100278265			GRMZM2G008175		Zm00001d019070
MQTL10.01	GRMZM2G454594	Zm00001d023796						GRMZM2G008202		Zm00001d031986
MQTL10.01	GRMZM2G568290	Zm00001d023776						GRMZM2G008316		Zm00001d032321
MQTL10.01	GRMZM2G700008							GRMZM2G008341		Zm00001d032343
MQTL10.01	GRMZM2G704428							GRMZM2G008425		Zm00001d033097
MQTL10.02	AC190590.3_FG001		Zm00001eb412770					GRMZM2G008497		Zm00001d033213
MQTL10.02	AC196714.3_FG004							GRMZM2G008972		Zm00001d034003
MQTL10.02	AC200225.5_FG001	Zm00001d024183	Zm00001eb412740					GRMZM2G009125		Zm00001d034364
MQTL10.02	AC210948.3_FG001							GRMZM2G009214		Zm00001d034835
MQTL10.02	AC215639.3_FG002	Zm00001d024175	Zm00001eb412670	103641082	gibberellin 2-beta-dioxygenase 1			GRMZM2G009335		Zm00001d034879
MQTL10.02	AC215639.3_FG002	Zm00001d024175	Zm00001eb412660					GRMZM2G009426		Zm00001d028015
MQTL10.02	GRMZM2G038950	Zm00001d024171	Zm00001eb412610	100280573	mitochondrial import inner membrane translocase subunit TIM14 precursor			GRMZM2G009435		Zm00001d033982
MQTL10.02	GRMZM2G058498	Zm00001d024158	Zm00001eb412490	100283675	rae1-like protein			GRMZM2G009506		Zm00001d002345
MQTL10.02	GRMZM2G069264		Zm00001eb412530					GRMZM2G009575		Zm00001d002699
MQTL10.02	GRMZM2G084597		Zm00001eb412780					GRMZM2G009593		Zm00001d002712
MQTL10.02	GRMZM2G094352	Zm00001d024160	Zm00001eb412510	100192658	uncharacterized protein LOC100192658			GRMZM2G009624		Zm00001d006455
MQTL10.02	GRMZM2G102156	Zm00001d024159	Zm00001eb412500	100382888	uncharacterized protein LOC100382888			GRMZM2G009655		Zm00001d006616
MQTL10.02	GRMZM2G135286	Zm00001d024178	Zm00001eb412710					GRMZM2G009681		Zm00001d007111
MQTL10.02	GRMZM2G137715	Zm00001d024169	Zm00001eb412590	100282162	uncharacterized protein LOC100282162			GRMZM2G009715		Zm00001d007232
MQTL10.02	GRMZM2G145909	Zm00001d024166	Zm00001eb412560					GRMZM2G009837		Zm00001d041747
MQTL10.02	GRMZM2G361718	Zm00001d024170	Zm00001eb412600					GRMZM2G009904		Zm00001d042028
MQTL10.02	GRMZM2G367483	Zm00001d024186	Zm00001eb412790					GRMZM2G009928		Zm00001d042638
MQTL10.02	GRMZM2G368486	Zm00001d024164	Zm00001eb412540					GRMZM2G009987		Zm00001d042822
MQTL10.02	GRMZM2G419166							GRMZM2G009995		Zm00001d043666
MQTL10.02	GRMZM2G434549		Zm00001eb412770					GRMZM2G010011		Zm00001d043937
MQTL10.02	GRMZM2G459370	Zm00001d024185	Zm00001eb412760					GRMZM2G010085		Zm00001d044094
MQTL10.02	GRMZM2G523064							GRMZM2G010282		Zm00001d044532
MQTL10.02	GRMZM2G538119	Zm00001d024184						GRMZM2G010338		Zm00001d048666
MQTL10.02	GRMZM2G574175							GRMZM2G010494		Zm00001d048808
MQTL10.02	GRMZM2G700239							GRMZM2G010596		Zm00001d049076
MQTL10.02	GRMZM5G809546		Zm00001eb412690	542482	preprotein translocase subunit SECY, chloroplastic			GRMZM2G010673		Zm00001d049516
MQTL10.03	AC187404.3_FG003							GRMZM2G010745		Zm00001d050148
MQTL10.03	AC187404.3_FG006	Zm00001d024257						GRMZM2G010765		Zm00001d004927
MQTL10.03	AC189883.3_FG002							GRMZM2G010775		Zm00001d049304
MQTL10.03	AC199335.3_FG002							GRMZM2G010973		Zm00001d025918
MQTL10.03	AC203316.3_FG003							GRMZM2G011006
MQTL10.03	AC203316.3_FG004							GRMZM2G011079
MQTL10.03	GRMZM2G004732	Zm00001d024220	Zm00001eb413030	100502402	uncharacterized protein LOC100502402			GRMZM2G011101
MQTL10.03	GRMZM2G005938	Zm00001d024248	Zm00001eb413390	103641124	pentatricopeptide repeat-containing protein At3g59040			GRMZM2G011789
MQTL10.03	GRMZM2G006083	Zm00001d024251	Zm00001eb413410	103641126	transcription factor GTE7 isoform X1			GRMZM2G011806
MQTL10.03	GRMZM2G007140	Zm00001d024258	Zm00001eb413470					GRMZM2G011951
MQTL10.03	GRMZM2G009681	Zm00001d024230	Zm00001eb413100	100273685	nuclear transcription factor Y subunit C-2			GRMZM2G011968
MQTL10.03	GRMZM2G009681	Zm00001d024231	Zm00001eb413100	100273685	nuclear transcription factor Y subunit C-2			GRMZM2G011998
MQTL10.03	GRMZM2G012530	Zm00001d000008	Zm00001eb413250	103641119	putative germin-like protein 12-4 isoform X1			GRMZM2G012030
MQTL10.03	GRMZM2G012761	Zm00001d000023	Zm00001eb413150	100280286	uncharacterized protein LOC100280286 isoform 2			GRMZM2G012044
MQTL10.03	GRMZM2G049930	Zm00001d000012	Zm00001eb413210	103641117	putative germin-like protein 12-4			GRMZM2G012213
MQTL10.03	GRMZM2G052036	Zm00001d024241	Zm00001eb413340	100275650	uncharacterized protein LOC100275650			GRMZM2G012530
MQTL10.03	GRMZM2G053177	Zm00001d000009	Zm00001eb413240	100193884	uncharacterized protein LOC100193884 isoform 2			GRMZM2G012648
MQTL10.03	GRMZM2G071390	Zm00001d000017	Zm00001eb413190	103641113	uncharacterized protein LOC100286232 precursor			GRMZM2G012761
MQTL10.03	GRMZM2G079777	Zm00001d024242						GRMZM2G012865
MQTL10.03	GRMZM2G079925	Zm00001d024243	Zm00001eb413360	103641122	pentatricopeptide repeat-containing protein At5g66500, mitochondrial			GRMZM2G012904
MQTL10.03	GRMZM2G087111	Zm00001d000006	Zm00001eb413260	100286113	germin-like protein subfamily 1 member 11 precursor			GRMZM2G013065
MQTL10.03	GRMZM2G092024	Zm00001d024223	Zm00001eb413070					GRMZM2G013082
MQTL10.03	GRMZM2G097509	Zm00001d000016	Zm00001eb413200	103642464				GRMZM2G013214
MQTL10.03	GRMZM2G112278							GRMZM2G013357
MQTL10.03	GRMZM2G118063		Zm00001eb413140	100279257	uncharacterized protein LOC100279257			GRMZM2G013378
MQTL10.03	GRMZM2G126471	Zm00001d024222	Zm00001eb413050					GRMZM2G013519
MQTL10.03	GRMZM2G127336	Zm00001d024234	Zm00001eb413120	103641105	(E)-beta-caryophyllene synthase isoform X2			GRMZM2G013619
MQTL10.03	GRMZM2G134613	Zm00001d024239	Zm00001eb413320					GRMZM2G013767
MQTL10.03	GRMZM2G134655		Zm00001eb413330					GRMZM2G013821
MQTL10.03	GRMZM2G141399	Zm00001d000002	Zm00001eb413290					GRMZM2G014009
MQTL10.03	GRMZM2G142565	Zm00001d000004	Zm00001eb413280	100283203	uncharacterized protein LOC100283203			GRMZM2G014187
MQTL10.03	GRMZM2G142565	Zm00001d000004	Zm00001eb413280	100283927	cysteine-rich PDZ-binding protein			GRMZM2G014356
MQTL10.03	GRMZM2G142620	Zm00001d000005	Zm00001eb413270	100191718	uncharacterized protein LOC100191718			GRMZM2G014441
MQTL10.03	GRMZM2G147683	Zm00001d024237	Zm00001eb413130					GRMZM2G014577
MQTL10.03	GRMZM2G172904	Zm00001d024252	Zm00001eb413420					GRMZM2G014580
MQTL10.03	GRMZM2G175401	Zm00001d000020	Zm00001eb413170	103641109	fatty acid desaturase 4, chloroplastic			GRMZM2G014612
MQTL10.03	GRMZM2G178817	Zm00001d000018	Zm00001eb413180	103641112	putative germin-like protein 12-4			GRMZM2G014618
MQTL10.03	GRMZM2G180720	Zm00001d000021	Zm00001eb413160	542599	glucose-6-phosphate/phosphate-translocator precursor			GRMZM2G014672
MQTL10.03	GRMZM2G181192	Zm00001d024245	Zm00001eb413370					GRMZM2G014695
MQTL10.03	GRMZM2G305757	Zm00001d024262	Zm00001eb413480					GRMZM2G014902
MQTL10.03	GRMZM2G305757	Zm00001d024262	Zm00001eb413500					GRMZM2G014975
MQTL10.03	GRMZM2G305757	Zm00001d024262	Zm00001eb413510					GRMZM2G014977
MQTL10.03	GRMZM2G311316	Zm00001d024230	Zm00001eb413110					GRMZM2G015033
MQTL10.03	GRMZM2G311316	Zm00001d024230	Zm00001eb413110					GRMZM2G015040
MQTL10.03	GRMZM2G311316	Zm00001d024231	Zm00001eb413110					GRMZM2G015127
MQTL10.03	GRMZM2G311316	Zm00001d024231	Zm00001eb413110					GRMZM2G015200
MQTL10.03	GRMZM2G316371	Zm00001d024266	Zm00001eb413530					GRMZM2G015238
MQTL10.03	GRMZM2G316371	Zm00001d024267	Zm00001eb413530					GRMZM2G015277
MQTL10.03	GRMZM2G363971	Zm00001d024250	Zm00001eb413400					GRMZM2G015502
MQTL10.03	GRMZM2G383778							GRMZM2G015603
MQTL10.03	GRMZM2G384107							GRMZM2G015610
MQTL10.03	GRMZM2G402881	Zm00001d024256	Zm00001eb413460					GRMZM2G015767
MQTL10.03	GRMZM2G485905	Zm00001d024262	Zm00001eb413490					GRMZM2G015844
MQTL10.03	GRMZM2G485905	Zm00001d024262	Zm00001eb413490					GRMZM2G015861
MQTL10.03	GRMZM2G485905	Zm00001d024262	Zm00001eb413500					GRMZM2G015886
MQTL10.03	GRMZM2G485905	Zm00001d024262	Zm00001eb413510					GRMZM2G015959
MQTL10.03	GRMZM5G812144	Zm00001d024225	Zm00001eb413080	100194363	Histone-lysine N-methyltransferase ATXR3			GRMZM2G016583
MQTL10.03	GRMZM5G851266	Zm00001d000001	Zm00001eb413300	103641120	polyphenol oxidase I, chloroplastic			GRMZM2G016705
MQTL10.03	GRMZM5G862119	Zm00001d000003						GRMZM2G016749
MQTL10.04	AC196202.3_FG007	Zm00001d024442	Zm00001eb414860					GRMZM2G016756
MQTL10.04	AC199911.5_FG001	Zm00001d024465	Zm00001eb414980	103641218				GRMZM2G016958
MQTL10.04	AC215874.3_FG003	Zm00001d024428						GRMZM2G017081
MQTL10.04	GRMZM2G022359	Zm00001d024468	Zm00001eb415010					GRMZM2G017321
MQTL10.04	GRMZM2G022506	Zm00001d024467	Zm00001eb415000					GRMZM2G017416
MQTL10.04	GRMZM2G027750	Zm00001d024466	Zm00001eb414990	103641219	cullin-3A isoform X1			GRMZM2G017426
MQTL10.04	GRMZM2G039671	Zm00001d024463	Zm00001eb414960	103641217	thyroid adenoma-associated protein homolog			GRMZM2G017520
MQTL10.04	GRMZM2G039824	Zm00001d024462	Zm00001eb414950	100276576	uncharacterized protein LOC100276576			GRMZM2G017532
MQTL10.04	GRMZM2G055059	Zm00001d024437	Zm00001eb195220	100279894	uncharacterized protein LOC100279894			GRMZM2G017607
MQTL10.04	GRMZM2G055059	Zm00001d052339	Zm00001eb195220	100279894	uncharacterized protein LOC100279894			GRMZM2G017643
MQTL10.04	GRMZM2G055059	Zm00001d024437	Zm00001eb414840	103641207	uncharacterized protein LOC103641207			GRMZM2G017666
MQTL10.04	GRMZM2G055059	Zm00001d052339	Zm00001eb414840	103641207	uncharacterized protein LOC103641207			GRMZM2G017671
MQTL10.04	GRMZM2G055070	Zm00001d024436	Zm00001eb414830	103642514	ethylene-responsive transcription factor FZP			GRMZM2G017847
MQTL10.04	GRMZM2G072621	Zm00001d024444	Zm00001eb414870	100217014	uncharacterized protein LOC100217014			GRMZM2G017853
MQTL10.04	GRMZM2G072621	Zm00001d024445	Zm00001eb414870	100217014	uncharacterized protein LOC100217014			GRMZM2G017933
MQTL10.04	GRMZM2G072621	Zm00001d024447	Zm00001eb414870	100217014	uncharacterized protein LOC100217014			GRMZM2G017982
MQTL10.04	GRMZM2G072621	Zm00001d024450	Zm00001eb414870	100217014	uncharacterized protein LOC100217014			GRMZM2G018126
MQTL10.04	GRMZM2G072621	Zm00001d024444	Zm00001eb414890					GRMZM2G018228
MQTL10.04	GRMZM2G072621	Zm00001d024445	Zm00001eb414890					GRMZM2G018281
MQTL10.04	GRMZM2G072621	Zm00001d024447	Zm00001eb414890					GRMZM2G018336
MQTL10.04	GRMZM2G072621	Zm00001d024450	Zm00001eb414890					GRMZM2G018353
MQTL10.04	GRMZM2G087395	Zm00001d024429	Zm00001eb414780	100272285	uncharacterized protein LOC100272285			GRMZM2G018441
MQTL10.04	GRMZM2G087525							GRMZM2G018566
MQTL10.04	GRMZM2G107521	Zm00001d024444	Zm00001eb414880					GRMZM2G018612
MQTL10.04	GRMZM2G107521	Zm00001d024444	Zm00001eb414880					GRMZM2G018619
MQTL10.04	GRMZM2G107521	Zm00001d024445	Zm00001eb414880					GRMZM2G018689
MQTL10.04	GRMZM2G107521	Zm00001d024445	Zm00001eb414880					GRMZM2G018782
MQTL10.04	GRMZM2G107521	Zm00001d024447	Zm00001eb414880					GRMZM2G018962
MQTL10.04	GRMZM2G107521	Zm00001d024447	Zm00001eb414880					GRMZM2G019006
MQTL10.04	GRMZM2G107521	Zm00001d024450	Zm00001eb414880					GRMZM2G019586
MQTL10.04	GRMZM2G107521	Zm00001d024450	Zm00001eb414880					GRMZM2G019621
MQTL10.04	GRMZM2G107521	Zm00001d024444	Zm00001eb414890					GRMZM2G019721
MQTL10.04	GRMZM2G107521	Zm00001d024445	Zm00001eb414890					GRMZM2G019783
MQTL10.04	GRMZM2G107521	Zm00001d024447	Zm00001eb414890					GRMZM2G019810
MQTL10.04	GRMZM2G107521	Zm00001d024450	Zm00001eb414890					GRMZM2G019863
MQTL10.04	GRMZM2G107595	Zm00001d024444						GRMZM2G019872
MQTL10.04	GRMZM2G107595	Zm00001d024445						GRMZM2G019876
MQTL10.04	GRMZM2G107595	Zm00001d024447						GRMZM2G020040
MQTL10.04	GRMZM2G107595	Zm00001d024450						GRMZM2G020098
MQTL10.04	GRMZM2G107616	Zm00001d024444						GRMZM2G020183
MQTL10.04	GRMZM2G107616	Zm00001d024445						GRMZM2G020500
MQTL10.04	GRMZM2G107616	Zm00001d024447						GRMZM2G020610
MQTL10.04	GRMZM2G107616	Zm00001d024450						GRMZM2G020704
MQTL10.04	GRMZM2G122941	Zm00001d024444						GRMZM2G020801
MQTL10.04	GRMZM2G122941	Zm00001d024445						GRMZM2G020828
MQTL10.04	GRMZM2G122941	Zm00001d024447						GRMZM2G021059
MQTL10.04	GRMZM2G122941	Zm00001d024450						GRMZM2G021225
MQTL10.04	GRMZM2G123644	Zm00001d024435	Zm00001eb414820					GRMZM2G021270
MQTL10.04	GRMZM2G123654	Zm00001d024432	Zm00001eb414810	100284673	transferase family protein			GRMZM2G021319
MQTL10.04	GRMZM2G133512	Zm00001d024470	Zm00001eb415030					GRMZM2G021459
MQTL10.04	GRMZM2G141071	Zm00001d024460	Zm00001eb414940					GRMZM2G021464
MQTL10.04	GRMZM2G141133	Zm00001d024458						GRMZM2G021482
MQTL10.04	GRMZM2G141136		Zm00001eb414920					GRMZM2G021831
MQTL10.04	GRMZM2G141150							GRMZM2G021879
MQTL10.04	GRMZM2G141152							GRMZM2G021896
MQTL10.04	GRMZM2G162574							GRMZM2G021973
MQTL10.04	GRMZM2G343080	Zm00001d024464	Zm00001eb414970	100194104	uncharacterized protein LOC100194104 isoform 1			GRMZM2G022014
MQTL10.04	GRMZM2G343519	Zm00001d024469	Zm00001eb415020	103642524	uncharacterized protein LOC103642524			GRMZM2G022019
MQTL10.04	GRMZM2G355959	Zm00001d024438						GRMZM2G022061
MQTL10.04	GRMZM2G384439	Zm00001d024430	Zm00001eb414790	103641205	somatic embryogenesis receptor kinase 2-like precursor			GRMZM2G022088
MQTL10.04	GRMZM2G407393	Zm00001d024444						GRMZM2G022175
MQTL10.04	GRMZM2G407393	Zm00001d024445						GRMZM2G022244
MQTL10.04	GRMZM2G407393	Zm00001d024447						GRMZM2G022275
MQTL10.04	GRMZM2G407393	Zm00001d024450						GRMZM2G022359
MQTL10.04	GRMZM2G407495	Zm00001d024471	Zm00001eb415040					GRMZM2G022506
MQTL10.04	GRMZM2G440972	Zm00001d024454	Zm00001eb414900					GRMZM2G022558
MQTL10.04	GRMZM2G442458	Zm00001d024455	Zm00001eb414910					GRMZM2G022629
MQTL10.04	GRMZM2G460893	Zm00001d024427	Zm00001eb414770					GRMZM2G022634
MQTL10.04	GRMZM2G531052	Zm00001d024440						GRMZM2G022637
MQTL10.04	GRMZM2G531052	Zm00001d024441						GRMZM2G022645
MQTL10.04	GRMZM2G700899	Zm00001d024444						GRMZM2G022659
MQTL10.04	GRMZM2G700899	Zm00001d024445						GRMZM2G022699
MQTL10.04	GRMZM2G700899	Zm00001d024447						GRMZM2G022782
MQTL10.04	GRMZM2G700899	Zm00001d024450						GRMZM2G022797
MQTL10.04	GRMZM5G846356							GRMZM2G022804
MQTL10.04	GRMZM5G850027							GRMZM2G022884
MQTL10.04	GRMZM5G858232	Zm00001d024444						GRMZM2G023008
MQTL10.04	GRMZM5G858232	Zm00001d024445						GRMZM2G023625
MQTL10.04	GRMZM5G858232	Zm00001d024447						GRMZM2G023946
MQTL10.04	GRMZM5G858232	Zm00001d024450						GRMZM2G024119
MQTL10.04	GRMZM5G885714	Zm00001d024444						GRMZM2G024150
MQTL10.04	GRMZM5G885714	Zm00001d024445						GRMZM2G024155
MQTL10.04	GRMZM5G885714	Zm00001d024447						GRMZM2G024211
MQTL10.04	GRMZM5G885714	Zm00001d024450						GRMZM2G024245
MQTL10.05	AC187899.3_FG002		Zm00001eb416030					GRMZM2G024312
MQTL10.05	AC191708.3_FG001	Zm00001d024554	Zm00001eb415830					GRMZM2G024395
MQTL10.05	AC191708.3_FG002	Zm00001d024559	Zm00001eb415880					GRMZM2G024482
MQTL10.05	AC194273.3_FG006	Zm00001d024565	Zm00001eb415920					GRMZM2G024495
MQTL10.05	AC194273.3_FG007	Zm00001d024562	Zm00001eb415910					GRMZM2G024517
MQTL10.05	AC195058.3_FG003		Zm00001eb416020					GRMZM2G024657
MQTL10.05	AC197771.3_FG001		Zm00001eb415810					GRMZM2G024733
MQTL10.05	AC197771.3_FG001		Zm00001eb415820					GRMZM2G024827
MQTL10.05	AC203985.4_FG001	Zm00001d024572	Zm00001eb415960					GRMZM2G024851
MQTL10.05	AC203985.4_FG005	Zm00001d024573	Zm00001eb415970					GRMZM2G024948
MQTL10.05	GRMZM2G032564	Zm00001d024571	Zm00001eb415950	100286075	60S ribosomal protein L34			GRMZM2G025026
MQTL10.05	GRMZM2G033862		Zm00001eb415840					GRMZM2G025054
MQTL10.05	GRMZM2G044306	Zm00001d024583	Zm00001eb416050	541967	DNA-directed RNA polymerase II subunit 1			GRMZM2G025164
MQTL10.05	GRMZM2G063322	Zm00001d024591	Zm00001eb416130	100286339	snRNP core Sm protein Sm-X5-like protein			GRMZM2G025205
MQTL10.05	GRMZM2G063322	Zm00001d024592	Zm00001eb416130	100286339	snRNP core Sm protein Sm-X5-like protein			GRMZM2G025222
MQTL10.05	GRMZM2G063322	Zm00001d024593	Zm00001eb416130	100286339	snRNP core Sm protein Sm-X5-like protein			GRMZM2G025248
MQTL10.05	GRMZM2G077317	Zm00001d024594	Zm00001eb416150					GRMZM2G025366
MQTL10.05	GRMZM2G077317	Zm00001d024595	Zm00001eb416150					GRMZM2G025480
MQTL10.05	GRMZM2G085845	Zm00001d024574	Zm00001eb415980					GRMZM2G025833
MQTL10.05	GRMZM2G085845	Zm00001d024574	Zm00001eb415990					GRMZM2G025903
MQTL10.05	GRMZM2G086117	Zm00001d024575	Zm00001eb416000					GRMZM2G026143
MQTL10.05	GRMZM2G086496	Zm00001d024587	Zm00001eb416090					GRMZM2G026182
MQTL10.05	GRMZM2G123886	Zm00001d024567	Zm00001eb415930	100273854	uncharacterized protein LOC100273854			GRMZM2G026184
MQTL10.05	GRMZM2G123886	Zm00001d024568	Zm00001eb415930	100273854	uncharacterized protein LOC100273854			GRMZM2G026216
MQTL10.05	GRMZM2G172642	Zm00001d024594	Zm00001eb416150					GRMZM2G026447
MQTL10.05	GRMZM2G172642	Zm00001d024595	Zm00001eb416150					GRMZM2G026459
MQTL10.05	GRMZM2G175101	Zm00001d024549						GRMZM2G026556
MQTL10.05	GRMZM2G175165	Zm00001d024548	Zm00001eb415780					GRMZM2G026580
MQTL10.05	GRMZM2G175265	Zm00001d024547						GRMZM2G026676
MQTL10.05	GRMZM2G180168	Zm00001d024545	Zm00001eb415750	103642549	putative B3 domain-containing protein Os08g0157700			GRMZM2G026744
MQTL10.05	GRMZM2G309933	Zm00001d024544	Zm00001eb415740	100383048	uncharacterized protein LOC100383048			GRMZM2G026900
MQTL10.05	GRMZM2G363913	Zm00001d024591	Zm00001eb416130	100286339	snRNP core Sm protein Sm-X5-like protein			GRMZM2G026939
MQTL10.05	GRMZM2G363913	Zm00001d024592	Zm00001eb416130	100286339	snRNP core Sm protein Sm-X5-like protein			GRMZM2G026956
MQTL10.05	GRMZM2G363913	Zm00001d024593	Zm00001eb416130	100286339	snRNP core Sm protein Sm-X5-like protein			GRMZM2G027107
MQTL10.05	GRMZM2G385989	Zm00001d024588	Zm00001eb416110					GRMZM2G027135
MQTL10.05	GRMZM2G471335	Zm00001d024552						GRMZM2G027232
MQTL10.05	GRMZM2G474769	Zm00001d024546	Zm00001eb415760					GRMZM2G027307
MQTL10.05	GRMZM2G474769	Zm00001d024546	Zm00001eb415770					GRMZM2G027351
MQTL10.05	GRMZM2G532939							GRMZM2G027476
MQTL10.05	GRMZM5G801666							GRMZM2G027495
MQTL10.05	GRMZM5G806309	Zm00001d024567	Zm00001eb415940	103641278	mitogen-activated protein kinase 2			GRMZM2G027571
MQTL10.05	GRMZM5G806309	Zm00001d024567	Zm00001eb415940	103641278	mitogen-activated protein kinase 2			GRMZM2G027632
MQTL10.05	GRMZM5G806309	Zm00001d024568	Zm00001eb415940	103641278	mitogen-activated protein kinase 2			GRMZM2G027638
MQTL10.05	GRMZM5G806309	Zm00001d024568	Zm00001eb415940	103641278	mitogen-activated protein kinase 2			GRMZM2G027673
MQTL10.05	GRMZM5G811268		Zm00001eb415840					GRMZM2G027741
MQTL10.05	GRMZM5G821482							GRMZM2G027750
MQTL10.05	GRMZM5G839744							GRMZM2G027782
MQTL10.06	AC198506.3_FG001	Zm00001d025666	Zm00001eb424680					GRMZM2G027825
MQTL10.06	AC203841.3_FG002	Zm00001d025656	Zm00001eb424590					GRMZM2G027891
MQTL10.06	AC203841.3_FG009	Zm00001d025658	Zm00001eb424610	100281582	CAB2 precursor			GRMZM2G028007
MQTL10.06	AC214507.3_FG001	Zm00001d025706	Zm00001eb425090					GRMZM2G028036
MQTL10.06	AC216229.3_FG002	Zm00001d025773	Zm00001eb425830	100282559	S-adenosylmethionine decarboxylase proenzyme			GRMZM2G028108
MQTL10.06	AC217043.3_FG002	Zm00001d025685	Zm00001eb424880					GRMZM2G028114
MQTL10.06	AC217043.3_FG002	Zm00001d025686	Zm00001eb424880					GRMZM2G028129
MQTL10.06	AC217043.3_FG008	Zm00001d025691	Zm00001eb424950					GRMZM2G028179
MQTL10.06	AC219061.2_FG007	Zm00001d025746	Zm00001eb425530	100274892	uncharacterized protein LOC100274892			GRMZM2G028183
MQTL10.06	AC225176.2_FG003	Zm00001d025612	Zm00001eb424240					GRMZM2G028218
MQTL10.06	AC225176.2_FG006	Zm00001d025611	Zm00001eb424230					GRMZM2G028313
MQTL10.06	AC225191.2_FG002							GRMZM2G028397
MQTL10.06	AC226227.2_FG003	Zm00001d025804	Zm00001eb426090					GRMZM2G028501
MQTL10.06	AC226227.2_FG003	Zm00001d025804	Zm00001eb426100					GRMZM2G028605
MQTL10.06	AC226227.2_FG004	Zm00001d025805	Zm00001eb426110					GRMZM2G028721
MQTL10.06	AC226227.2_FG004	Zm00001d025806	Zm00001eb426110					GRMZM2G028730
MQTL10.06	AC226227.2_FG004	Zm00001d025805	Zm00001eb426120					GRMZM2G028745
MQTL10.06	AC226227.2_FG004	Zm00001d025806	Zm00001eb426120					GRMZM2G028766
MQTL10.06	AC226227.2_FG005	Zm00001d025807	Zm00001eb426130	100191886	uncharacterized protein LOC100191886			GRMZM2G028813
MQTL10.06	AC226227.2_FG005	Zm00001d025807	Zm00001eb426140					GRMZM2G029029
MQTL10.06	AC233888.1_FG001	Zm00001d025771	Zm00001eb425800					GRMZM2G029079
MQTL10.06	AC233888.1_FG002	Zm00001d025770	Zm00001eb425790	103641806	zinc finger protein CONSTANS-LIKE 3			GRMZM2G029101
MQTL10.06	GRMZM2G000223							GRMZM2G029186
MQTL10.06	GRMZM2G000245	Zm00001d025789	Zm00001eb425970					GRMZM2G029219
MQTL10.06	GRMZM2G000261	Zm00001d025788	Zm00001eb425960	103641816	BTB/POZ domain-containing protein At2g24240			GRMZM2G029249
MQTL10.06	GRMZM2G000271		Zm00001eb425950					GRMZM2G029267
MQTL10.06	GRMZM2G003916	Zm00001d025671						GRMZM2G029270
MQTL10.06	GRMZM2G003917	Zm00001d025672	Zm00001eb424730	103641751	fasciclin-like arabinogalactan protein 7			GRMZM2G029636
MQTL10.06	GRMZM2G005633	Zm00001d025753	Zm00001eb425600					GRMZM2G029815
MQTL10.06	GRMZM2G005865	Zm00001d025717	Zm00001eb425190					GRMZM2G029850
MQTL10.06	GRMZM2G005939	Zm00001d025752	Zm00001eb425590	100193902	uncharacterized protein LOC100193902			GRMZM2G029956
MQTL10.06	GRMZM2G006216	Zm00001d025751	Zm00001eb425580	100304233	uncharacterized protein LOC100304233			GRMZM2G030128
MQTL10.06	GRMZM2G006428	Zm00001d025750	Zm00001eb425570	100273409	uncharacterized protein LOC100273409			GRMZM2G030768
MQTL10.06	GRMZM2G006948	Zm00001d025668	Zm00001eb424700	103641749	uncharacterized protein LOC103641749			GRMZM2G030772
MQTL10.06	GRMZM2G007481							GRMZM2G030821
MQTL10.06	GRMZM2G013619	Zm00001d025801	Zm00001eb426070					GRMZM2G030850
MQTL10.06	GRMZM2G017426	Zm00001d025581	Zm00001eb423980	100304309	uncharacterized protein LOC100304309			GRMZM2G031028
MQTL10.06	GRMZM2G018281	Zm00001d025749	Zm00001eb425560					GRMZM2G031167
MQTL10.06	GRMZM2G018353	Zm00001d025748	Zm00001eb425550					GRMZM2G031429
MQTL10.06	GRMZM2G018441	Zm00001d025747	Zm00001eb425540	100193796	uncharacterized protein LOC100193796			GRMZM2G031568
MQTL10.06	GRMZM2G018689	Zm00001d025745	Zm00001eb425520	100282734	uncharacterized protein LOC100282734			GRMZM2G031591
MQTL10.06	GRMZM2G019621	Zm00001d025687	Zm00001eb424890	100193425	thyroid receptor-interacting protein 13			GRMZM2G031827
MQTL10.06	GRMZM2G021482	Zm00001d025670	Zm00001eb424720	100382543	uncharacterized protein LOC100382543 precursor			GRMZM2G031846
MQTL10.06	GRMZM2G025054	Zm00001d025689	Zm00001eb424930	100285057	uncharacterized protein LOC100285057			GRMZM2G031904
MQTL10.06	GRMZM2G025366	Zm00001d025690	Zm00001eb424940	542698	isocitrate dehydrogenase [NAD] regulatory subunit 1, mitochondrial isoform 1			GRMZM2G031941
MQTL10.06	GRMZM2G026580	Zm00001d025710	Zm00001eb425120					GRMZM2G031952
MQTL10.06	GRMZM2G031963	Zm00001d025669	Zm00001eb424710	103641750	probable WRKY transcription factor 34			GRMZM2G031963
MQTL10.06	GRMZM2G032143	Zm00001d025636						GRMZM2G031981
MQTL10.06	GRMZM2G034882	Zm00001d025667	Zm00001eb424690					GRMZM2G032028
MQTL10.06	GRMZM2G035044							GRMZM2G032130
MQTL10.06	GRMZM2G036186	Zm00001d025570	Zm00001eb423870	100280339	putative ubiquitin carboxyl-terminal hydrolase superfamily protein			GRMZM2G032218
MQTL10.06	GRMZM2G038934	Zm00001d025670	Zm00001eb424720	100382543	uncharacterized protein LOC100382543 precursor			GRMZM2G032225
MQTL10.06	GRMZM2G039536	Zm00001d025711	Zm00001eb425130	100303883	uncharacterized protein LOC100303883			GRMZM2G032260
MQTL10.06	GRMZM2G039600	Zm00001d025712	Zm00001eb425140	103641776	uncharacterized protein LOC103641776 isoform X1			GRMZM2G032276
MQTL10.06	GRMZM2G039723	Zm00001d025593	Zm00001eb424110					GRMZM2G032348
MQTL10.06	GRMZM2G041183							GRMZM2G032384
MQTL10.06	GRMZM2G041513	Zm00001d025709	Zm00001eb425110					GRMZM2G032478
MQTL10.06	GRMZM2G047143	Zm00001d025721	Zm00001eb425240					GRMZM2G032554
MQTL10.06	GRMZM2G047370	Zm00001d025720	Zm00001eb425230	100280076	uncharacterized protein LOC100280076			GRMZM2G032555
MQTL10.06	GRMZM2G051852	Zm00001d025699	Zm00001eb425020					GRMZM2G032564
MQTL10.06	GRMZM2G057220							GRMZM2G032583
MQTL10.06	GRMZM2G057437	Zm00001d025639	Zm00001eb424450	100283603	SAM domain family protein isoform 1			GRMZM2G032648
MQTL10.06	GRMZM2G057554	Zm00001d025640	Zm00001eb424460	100286323	uncharacterized protein LOC100286323			GRMZM2G032910
MQTL10.06	GRMZM2G058525	Zm00001d025714	Zm00001eb425160	100501635	uncharacterized protein LOC100501635			GRMZM2G033098
MQTL10.06	GRMZM2G058573	Zm00001d025705	Zm00001eb425070	542568	uncharacterized protein LOC542568			GRMZM2G033198
MQTL10.06	GRMZM2G061537	Zm00001d025799	Zm00001eb426060	103641821	calmodulin-binding receptor-like cytoplasmic kinase 3 isoform X1			GRMZM2G033247
MQTL10.06	GRMZM2G062037	Zm00001d025738	Zm00001eb425440					GRMZM2G033267
MQTL10.06	GRMZM2G062052	Zm00001d025737	Zm00001eb425430	100127528	ZCN19 protein			GRMZM2G033626
MQTL10.06	GRMZM2G062390	Zm00001d025774	Zm00001eb425840	100273055	uncharacterized protein LOC100273055 precursor			GRMZM2G033829
MQTL10.06	GRMZM2G062390	Zm00001d025775	Zm00001eb425840	100273055	uncharacterized protein LOC100273055 precursor			GRMZM2G033862
MQTL10.06	GRMZM2G064159	Zm00001d025644	Zm00001eb424480	100280344	agmatine deiminase			GRMZM2G033926
MQTL10.06	GRMZM2G064278	Zm00001d025646	Zm00001eb424500					GRMZM2G034015
MQTL10.06	GRMZM2G064311	Zm00001d025649	Zm00001eb424530					GRMZM2G034143
MQTL10.06	GRMZM2G064320	Zm00001d025650	Zm00001eb424540					GRMZM2G034182
MQTL10.06	GRMZM2G065284	Zm00001d025682	Zm00001eb424860					GRMZM2G034253
MQTL10.06	GRMZM2G065292	Zm00001d025680	Zm00001eb424840	100193675	uncharacterized protein LOC100193675 precursor			GRMZM2G034276
MQTL10.06	GRMZM2G065292	Zm00001d025681	Zm00001eb424840	100193675	uncharacterized protein LOC100193675 precursor			GRMZM2G034278
MQTL10.06	GRMZM2G066059	Zm00001d025765	Zm00001eb425740	100240692	uncharacterized protein LOC100240692 isoform 1			GRMZM2G034372
MQTL10.06	GRMZM2G066162	Zm00001d025764	Zm00001eb425730	103641803	uncharacterized protein LOC103641803			GRMZM2G034385
MQTL10.06	GRMZM2G066163	Zm00001d025675	Zm00001eb424780	100383053	uncharacterized protein LOC100383053			GRMZM2G034623
MQTL10.06	GRMZM2G066248		Zm00001eb424770					GRMZM2G034876
MQTL10.06	GRMZM2G066815	Zm00001d025692	Zm00001eb424960					GRMZM2G034877
MQTL10.06	GRMZM2G069830	Zm00001d025568	Zm00001eb423850					GRMZM2G034882
MQTL10.06	GRMZM2G069830	Zm00001d025568	Zm00001eb423860					GRMZM2G034896
MQTL10.06	GRMZM2G069905							GRMZM2G035103
MQTL10.06	GRMZM2G070111	Zm00001d025763	Zm00001eb425720					GRMZM2G035118
MQTL10.06	GRMZM2G070255	Zm00001d025762	Zm00001eb425710					GRMZM2G035153
MQTL10.06	GRMZM2G070279	Zm00001d025761	Zm00001eb425700					GRMZM2G035213
MQTL10.06	GRMZM2G070448	Zm00001d025759	Zm00001eb425670					GRMZM2G035223
MQTL10.06	GRMZM2G070448	Zm00001d025759	Zm00001eb425680					GRMZM2G035248
MQTL10.06	GRMZM2G070454							GRMZM2G035285
MQTL10.06	GRMZM2G071264	Zm00001d025795	Zm00001eb426000					GRMZM2G035309
MQTL10.06	GRMZM2G071264	Zm00001d025796	Zm00001eb426000					GRMZM2G035338
MQTL10.06	GRMZM2G071264	Zm00001d025795	Zm00001eb426010					GRMZM2G035445
MQTL10.06	GRMZM2G071264	Zm00001d025796	Zm00001eb426010					GRMZM2G035514
MQTL10.06	GRMZM2G071360	Zm00001d025794	Zm00001eb425990	100194145	uncharacterized protein LOC100194145			GRMZM2G035563
MQTL10.06	GRMZM2G071518	Zm00001d025793	Zm00001eb425980	100274060	uncharacterized protein LOC100274060			GRMZM2G035579
MQTL10.06	GRMZM2G074689	Zm00001d025798	Zm00001eb426050	100274368	uncharacterized protein LOC100274368			GRMZM2G035599
MQTL10.06	GRMZM2G078641	Zm00001d025617	Zm00001eb424290	100279512	14-3-3-like protein GF14-12			GRMZM2G035779
MQTL10.06	GRMZM2G078641	Zm00001d025618	Zm00001eb424290	100279512	14-3-3-like protein GF14-12			GRMZM2G035948
MQTL10.06	GRMZM2G078641	Zm00001d025617	Zm00001eb424300					GRMZM2G036186
MQTL10.06	GRMZM2G078641	Zm00001d025618	Zm00001eb424300					GRMZM2G036605
MQTL10.06	GRMZM2G079342	Zm00001d025572	Zm00001eb423890					GRMZM2G036759
MQTL10.06	GRMZM2G079342	Zm00001d025572	Zm00001eb423900					GRMZM2G036826
MQTL10.06	GRMZM2G080575	Zm00001d025613	Zm00001eb424250	103641734	casparian strip membrane protein 2			GRMZM2G036829
MQTL10.06	GRMZM2G080594	Zm00001d025614	Zm00001eb424260	103642791	uncharacterized protein LOC103642791			GRMZM2G036991
MQTL10.06	GRMZM2G094072	Zm00001d025629	Zm00001eb424430	100126359	CFM family member 2			GRMZM2G037200
MQTL10.06	GRMZM2G094072	Zm00001d025633	Zm00001eb424430	100126359	CFM family member 2			GRMZM2G037284
MQTL10.06	GRMZM2G096705	Zm00001d025767	Zm00001eb425750					GRMZM2G037299
MQTL10.06	GRMZM2G098577	Zm00001d025777	Zm00001eb425860	100382039	uncharacterized protein LOC100382039			GRMZM2G037496
MQTL10.06	GRMZM2G101393	Zm00001d025803	Zm00001eb426080					GRMZM2G037595
MQTL10.06	GRMZM2G105004	Zm00001d025757	Zm00001eb425660					GRMZM2G037926
MQTL10.06	GRMZM2G107114	Zm00001d025619	Zm00001eb424310	541816	prohibitin 2			GRMZM2G038001
MQTL10.06	GRMZM2G107299	Zm00001d025622	Zm00001eb424340	100272468	uncharacterized protein LOC100272468			GRMZM2G038075
MQTL10.06	GRMZM2G107306	Zm00001d025623	Zm00001eb424350					GRMZM2G038279
MQTL10.06	GRMZM2G109496	Zm00001d025780	Zm00001eb425880	100272833	putative protein phosphatase 2C family protein			GRMZM2G038375
MQTL10.06	GRMZM2G111423	Zm00001d025703	Zm00001eb425050	103641772	ABC transporter B family member 15			GRMZM2G038835
MQTL10.06	GRMZM2G111423	Zm00001d025704	Zm00001eb425050	103641772	ABC transporter B family member 15			GRMZM2G038851
MQTL10.06	GRMZM2G111462	Zm00001d025703	Zm00001eb425060					GRMZM2G038916
MQTL10.06	GRMZM2G111462	Zm00001d025703	Zm00001eb425060					GRMZM2G038926
MQTL10.06	GRMZM2G111462	Zm00001d025704	Zm00001eb425060					GRMZM2G038934
MQTL10.06	GRMZM2G111462	Zm00001d025704	Zm00001eb425060					GRMZM2G038950
MQTL10.06	GRMZM2G111482							GRMZM2G039186
MQTL10.06	GRMZM2G111770	Zm00001d025684	Zm00001eb424870	103641765	SUPPRESSOR OF GAMMA RESPONSE 1 isoform X1			GRMZM2G039238
MQTL10.06	GRMZM2G123178	Zm00001d025674	Zm00001eb424770					GRMZM2G039359
MQTL10.06	GRMZM2G124396	Zm00001d025782	Zm00001eb425900					GRMZM2G039455
MQTL10.06	GRMZM2G124396	Zm00001d025783	Zm00001eb425900					GRMZM2G039536
MQTL10.06	GRMZM2G124396	Zm00001d025782	Zm00001eb425910					GRMZM2G039542
MQTL10.06	GRMZM2G124396	Zm00001d025783	Zm00001eb425910					GRMZM2G039586
MQTL10.06	GRMZM2G124411	Zm00001d025784	Zm00001eb425920					GRMZM2G039600
MQTL10.06	GRMZM2G125233	Zm00001d025586	Zm00001eb424010	100191144	uncharacterized protein LOC100191144 precursor			GRMZM2G039610
MQTL10.06	GRMZM2G125350	Zm00001d025587	Zm00001eb424020	103641717	uncharacterized protein LOC103641717			GRMZM2G039648
MQTL10.06	GRMZM2G125356	Zm00001d025588	Zm00001eb424030	542462	pectin methylesterase 1			GRMZM2G039671
MQTL10.06	GRMZM2G125424	Zm00001d025590	Zm00001eb424060	100383541	uncharacterized protein LOC100383541			GRMZM2G039725
MQTL10.06	GRMZM2G125452	Zm00001d025772	Zm00001eb425810	100383846	uncharacterized protein LOC100383846			GRMZM2G039824
MQTL10.06	GRMZM2G125635	Zm00001d025773	Zm00001eb425830	100282559	S-adenosylmethionine decarboxylase proenzyme			GRMZM2G040069
MQTL10.06	GRMZM2G128731	Zm00001d025675	Zm00001eb424780	100383053	uncharacterized protein LOC100383053			GRMZM2G040236
MQTL10.06	GRMZM2G132994	Zm00001d025680	Zm00001eb424850	100283123	uncharacterized protein LOC100283123			GRMZM2G040263
MQTL10.06	GRMZM2G132994	Zm00001d025680	Zm00001eb424850	100283123	uncharacterized protein LOC100283123			GRMZM2G040706
MQTL10.06	GRMZM2G132994	Zm00001d025681	Zm00001eb424850	100283123	uncharacterized protein LOC100283123			GRMZM2G040838
MQTL10.06	GRMZM2G132994	Zm00001d025681	Zm00001eb424850	100283123	uncharacterized protein LOC100283123			GRMZM2G040871
MQTL10.06	GRMZM2G133016	Zm00001d025679	Zm00001eb424820					GRMZM2G040968
MQTL10.06	GRMZM2G133067							GRMZM2G041050
MQTL10.06	GRMZM2G133077							GRMZM2G041312
MQTL10.06	GRMZM2G134539	Zm00001d025628	Zm00001eb424420	100282371	uncharacterized protein LOC100282371			GRMZM2G041415
MQTL10.06	GRMZM2G134604							GRMZM2G041424
MQTL10.06	GRMZM2G135430	Zm00001d025625	Zm00001eb424400	103641737	pentatricopeptide repeat-containing protein At4g39952, mitochondrial			GRMZM2G041506
MQTL10.06	GRMZM2G135470	Zm00001d025626	Zm00001eb424410					GRMZM2G041513
MQTL10.06	GRMZM2G135629	Zm00001d025727	Zm00001eb425310	103641784	U-box domain-containing protein 7 isoform X1			GRMZM2G041554
MQTL10.06	GRMZM2G135655	Zm00001d025585	Zm00001eb424000	103641716	uncharacterized protein LOC103641716			GRMZM2G041561
MQTL10.06	GRMZM2G137920	Zm00001d025769	Zm00001eb425770					GRMZM2G041701
MQTL10.06	GRMZM2G137920	Zm00001d025769	Zm00001eb425780					GRMZM2G041732
MQTL10.06	GRMZM2G137921							GRMZM2G041761
MQTL10.06	GRMZM2G137923							GRMZM2G041806
MQTL10.06	GRMZM2G143168	Zm00001d025584	Zm00001eb423990					GRMZM2G041831
MQTL10.06	GRMZM2G143590	Zm00001d025575	Zm00001eb423930					GRMZM2G041839
MQTL10.06	GRMZM2G146800	Zm00001d025781	Zm00001eb425890	103641809	uncharacterized protein LOC103641809 isoform X2			GRMZM2G041878
MQTL10.06	GRMZM2G149994	Zm00001d025776	Zm00001eb425850	100192818	cell division control protein 48 homolog B			GRMZM2G042061
MQTL10.06	GRMZM2G151367	Zm00001d025596						GRMZM2G042136
MQTL10.06	GRMZM2G159559	Zm00001d025573	Zm00001eb423910					GRMZM2G042147
MQTL10.06	GRMZM2G162845	Zm00001d025599	Zm00001eb424150					GRMZM2G042231
MQTL10.06	GRMZM2G164567	Zm00001d025734	Zm00001eb425390					GRMZM2G042443
MQTL10.06	GRMZM2G167280	Zm00001d025726	Zm00001eb425300					GRMZM2G042756
MQTL10.06	GRMZM2G167295	Zm00001d025725	Zm00001eb425290					GRMZM2G042855
MQTL10.06	GRMZM2G169516	Zm00001d025652	Zm00001eb424560	100274566	uncharacterized protein LOC100274566			GRMZM2G042870
MQTL10.06	GRMZM2G169648	Zm00001d025653	Zm00001eb424570					GRMZM2G042897
MQTL10.06	GRMZM2G169726	Zm00001d025654	Zm00001eb424580					GRMZM2G043109
MQTL10.06	GRMZM2G171383		Zm00001eb424380					GRMZM2G043226
MQTL10.06	GRMZM2G173597	Zm00001d025665	Zm00001eb424670	100283931	uncharacterized protein LOC100283931			GRMZM2G043453
MQTL10.06	GRMZM2G173633	Zm00001d025664	Zm00001eb424660	100279834	uncharacterized protein LOC100279834			GRMZM2G043460
MQTL10.06	GRMZM2G173649	Zm00001d025663	Zm00001eb424650	100192926	uncharacterized protein LOC100192926			GRMZM2G043575
MQTL10.06	GRMZM2G173649	Zm00001d025663	Zm00001eb424640					GRMZM2G043657
MQTL10.06	GRMZM2G173865	Zm00001d025662						GRMZM2G043802
MQTL10.06	GRMZM2G173878	Zm00001d025660	Zm00001eb424630					GRMZM2G043857
MQTL10.06	GRMZM2G175269	Zm00001d025786	Zm00001eb425930	103641812	probable GMP synthase [glutamine-hydrolyzing]			GRMZM2G043878
MQTL10.06	GRMZM2G175313	Zm00001d025740	Zm00001eb425460	103641793	protein HEAT INTOLERANT 4			GRMZM2G043976
MQTL10.06	GRMZM2G179097	Zm00001d025739	Zm00001eb425450	103641791	cyclin-dependent kinase G-2-like			GRMZM2G044027
MQTL10.06	GRMZM2G180716	Zm00001d025694	Zm00001eb424970					GRMZM2G044077
MQTL10.06	GRMZM2G180716	Zm00001d025695	Zm00001eb424970					GRMZM2G044132
MQTL10.06	GRMZM2G180716	Zm00001d025696	Zm00001eb424970					GRMZM2G044237
MQTL10.06	GRMZM2G180716	Zm00001d025694	Zm00001eb424990					GRMZM2G044246
MQTL10.06	GRMZM2G180716	Zm00001d025695	Zm00001eb424990					GRMZM2G044281
MQTL10.06	GRMZM2G180716	Zm00001d025696	Zm00001eb424990					GRMZM2G044306
MQTL10.06	GRMZM2G181453	Zm00001d025673	Zm00001eb424740					GRMZM2G044493
MQTL10.06	GRMZM2G181453	Zm00001d025673	Zm00001eb424750					GRMZM2G044495
MQTL10.06	GRMZM2G181453	Zm00001d025673	Zm00001eb424760					GRMZM2G044681
MQTL10.06	GRMZM2G300569		Zm00001eb425630					GRMZM2G044720
MQTL10.06	GRMZM2G301246	Zm00001d025651	Zm00001eb424550	100383372	uncharacterized protein LOC100383372			GRMZM2G044805
MQTL10.06	GRMZM2G306094	Zm00001d025716	Zm00001eb425180	100193582	uncharacterized protein LOC100193582 isoform 1			GRMZM2G044818
MQTL10.06	GRMZM2G306348	Zm00001d025722	Zm00001eb425250					GRMZM2G044851
MQTL10.06	GRMZM2G315885	Zm00001d025778						GRMZM2G045109
MQTL10.06	GRMZM2G330519	Zm00001d025811						GRMZM2G045154
MQTL10.06	GRMZM2G330526	Zm00001d025812	Zm00001eb426160	100284044	uncharacterized protein LOC100284044			GRMZM2G045303
MQTL10.06	GRMZM2G335521	Zm00001d025801	Zm00001eb426070					GRMZM2G045319
MQTL10.06	GRMZM2G347322	Zm00001d025629	Zm00001eb424440	100126359	CFM family member 2			GRMZM2G045398
MQTL10.06	GRMZM2G347322	Zm00001d025629	Zm00001eb424440	100126359	CFM family member 2			GRMZM2G045404
MQTL10.06	GRMZM2G347322	Zm00001d025633	Zm00001eb424440	100126359	CFM family member 2			GRMZM2G045452
MQTL10.06	GRMZM2G347322	Zm00001d025633	Zm00001eb424440	100126359	CFM family member 2			GRMZM2G045544
MQTL10.06	GRMZM2G358701	Zm00001d025638						GRMZM2G045668
MQTL10.06	GRMZM2G359735	Zm00001d025713	Zm00001eb425150	100383540	uncharacterized protein LOC100383540			GRMZM2G045675
MQTL10.06	GRMZM2G360873	Zm00001d025816	Zm00001eb426210					GRMZM2G045686
MQTL10.06	GRMZM2G361569	Zm00001d025616	Zm00001eb424280	100193993	30S ribosomal protein 3, chloroplastic-like			GRMZM2G045714
MQTL10.06	GRMZM2G362890	Zm00001d025718	Zm00001eb425210					GRMZM2G045816
MQTL10.06	GRMZM2G362890	Zm00001d025718	Zm00001eb425220					GRMZM2G045944
MQTL10.06	GRMZM2G364839	Zm00001d025645	Zm00001eb424490	103641743	uncharacterized protein LOC103641743			GRMZM2G045977
MQTL10.06	GRMZM2G367326							GRMZM2G046021
MQTL10.06	GRMZM2G367765		Zm00001eb424800					GRMZM2G046058
MQTL10.06	GRMZM2G367768		Zm00001eb424790					GRMZM2G046201
MQTL10.06	GRMZM2G381267	Zm00001d025571	Zm00001eb423880					GRMZM2G046238
MQTL10.06	GRMZM2G396049							GRMZM2G046244
MQTL10.06	GRMZM2G405071	Zm00001d025754	Zm00001eb425620	103641799	uncharacterized protein LOC103641799			GRMZM2G046316
MQTL10.06	GRMZM2G405071	Zm00001d025754	Zm00001eb425610					GRMZM2G046317
MQTL10.06	GRMZM2G410191	Zm00001d025700	Zm00001eb425040					GRMZM2G046392
MQTL10.06	GRMZM2G410191	Zm00001d025701	Zm00001eb425040					GRMZM2G046402
MQTL10.06	GRMZM2G414503	Zm00001d025814	Zm00001eb426190	107546775	uncharacterized protein LOC107546775 precursor			GRMZM2G046438
MQTL10.06	GRMZM2G414503	Zm00001d025814	Zm00001eb426180					GRMZM2G046480
MQTL10.06	GRMZM2G425920	Zm00001d025589	Zm00001eb424050	100383828	uncharacterized protein LOC100383828			GRMZM2G046498
MQTL10.06	GRMZM2G425920	Zm00001d025589	Zm00001eb424040					GRMZM2G046503
MQTL10.06	GRMZM2G428924	Zm00001d025676	Zm00001eb424790					GRMZM2G046532
MQTL10.06	GRMZM2G435881	Zm00001d025677	Zm00001eb424800					GRMZM2G046587
MQTL10.06	GRMZM2G435881	Zm00001d025677	Zm00001eb424810					GRMZM2G046609
MQTL10.06	GRMZM2G437481	Zm00001d025727	Zm00001eb425310	103641784	U-box domain-containing protein 7 isoform X1			GRMZM2G046748
MQTL10.06	GRMZM2G456586	Zm00001d025598	Zm00001eb424140					GRMZM2G046900
MQTL10.06	GRMZM2G461501	Zm00001d025603						GRMZM2G046909
MQTL10.06	GRMZM2G461557	Zm00001d025715	Zm00001eb425170	100216964	uncharacterized protein LOC100216964			GRMZM2G046924
MQTL10.06	GRMZM2G470365	Zm00001d025738	Zm00001eb425440					GRMZM2G047161
MQTL10.06	GRMZM2G473607	Zm00001d025741	Zm00001eb425480					GRMZM2G047292
MQTL10.06	GRMZM2G481373	Zm00001d025694	Zm00001eb424980	103641766	pentatricopeptide repeat-containing protein At1g08070, chloroplastic			GRMZM2G047370
MQTL10.06	GRMZM2G481373	Zm00001d025694	Zm00001eb424980	103641766	pentatricopeptide repeat-containing protein At1g08070, chloroplastic			GRMZM2G047476
MQTL10.06	GRMZM2G481373	Zm00001d025695	Zm00001eb424980	103641766	pentatricopeptide repeat-containing protein At1g08070, chloroplastic			GRMZM2G047486
MQTL10.06	GRMZM2G481373	Zm00001d025695	Zm00001eb424980	103641766	pentatricopeptide repeat-containing protein At1g08070, chloroplastic			GRMZM2G047533
MQTL10.06	GRMZM2G481373	Zm00001d025696	Zm00001eb424980	103641766	pentatricopeptide repeat-containing protein At1g08070, chloroplastic			GRMZM2G047564
MQTL10.06	GRMZM2G481373	Zm00001d025696	Zm00001eb424980	103641766	pentatricopeptide repeat-containing protein At1g08070, chloroplastic			GRMZM2G047684
MQTL10.06	GRMZM2G481373	Zm00001d025694	Zm00001eb424990					GRMZM2G047763
MQTL10.06	GRMZM2G481373	Zm00001d025695	Zm00001eb424990					GRMZM2G047781
MQTL10.06	GRMZM2G481373	Zm00001d025696	Zm00001eb424990					GRMZM2G047867
MQTL10.06	GRMZM2G517817							GRMZM2G047919
MQTL10.06	GRMZM2G529530							GRMZM2G047956
MQTL10.06	GRMZM2G546315							GRMZM2G048073
MQTL10.06	GRMZM2G702091							GRMZM2G048085
MQTL10.06	GRMZM2G702229	Zm00001d025724	Zm00001eb425270					GRMZM2G048121
MQTL10.06	GRMZM2G702244							GRMZM2G048154
MQTL10.06	GRMZM5G802115	Zm00001d025735	Zm00001eb425410					GRMZM2G048297
MQTL10.06	GRMZM5G802115	Zm00001d025735	Zm00001eb425420					GRMZM2G048324
MQTL10.06	GRMZM5G803297	Zm00001d025592	Zm00001eb424080					GRMZM2G048335
MQTL10.06	GRMZM5G803297	Zm00001d025592	Zm00001eb424090					GRMZM2G048435
MQTL10.06	GRMZM5G803297	Zm00001d025592	Zm00001eb424100					GRMZM2G048458
MQTL10.06	GRMZM5G804113							GRMZM2G048482
MQTL10.06	GRMZM5G811680	Zm00001d025610	Zm00001eb424220					GRMZM2G048559
MQTL10.06	GRMZM5G813055	Zm00001d025734	Zm00001eb425400					GRMZM2G048826
MQTL10.06	GRMZM5G813055	Zm00001d025734	Zm00001eb425400					GRMZM2G048919
MQTL10.06	GRMZM5G818247	Zm00001d025785						GRMZM2G049070
MQTL10.06	GRMZM5G821433	Zm00001d025607	Zm00001eb424190					GRMZM2G049549
MQTL10.06	GRMZM5G838754	Zm00001d025808	Zm00001eb426150	103641829	F-box protein At1g47056-like			GRMZM2G049568
MQTL10.06	GRMZM5G844045	Zm00001d025594						GRMZM2G049921
MQTL10.06	GRMZM5G845674	Zm00001d025611	Zm00001eb424230					GRMZM2G049930
MQTL10.06	GRMZM5G847431	Zm00001d025615	Zm00001eb424270					GRMZM2G050216
MQTL10.06	GRMZM5G850786	Zm00001d025734						GRMZM2G050234
MQTL10.06	GRMZM5G860302							GRMZM2G050262
MQTL10.06	GRMZM5G869501	Zm00001d025733	Zm00001eb425380					GRMZM2G050309
MQTL10.06	GRMZM5G870446	Zm00001d025574	Zm00001eb423920					GRMZM2G050435
MQTL10.06	GRMZM5G870959	Zm00001d025580	Zm00001eb423960	542015	somatic embryogenesis receptor-like kinase 1 precursor			GRMZM2G050450
MQTL10.06	GRMZM5G872368	Zm00001d025620	Zm00001eb424320					GRMZM2G050458
MQTL10.06	GRMZM5G880300	Zm00001d025657	Zm00001eb424600					GRMZM2G050460
MQTL10.06	GRMZM5G883510	Zm00001d025609	Zm00001eb424200					GRMZM2G050734
MQTL10.06	GRMZM5G886855	Zm00001d025597						GRMZM2G050741
MQTL10.06	GRMZM5G889705	Zm00001d025577						GRMZM2G050833
MQTL10.06	GRMZM5G893284	Zm00001d025604	Zm00001eb424170					GRMZM2G050861
MQTL10.06	GRMZM5G897749	Zm00001d025734						GRMZM2G050867
MQTL2.01	AC186904.4_FG007							GRMZM2G050912
MQTL2.01	AC191654.3_FG004							GRMZM2G050925
MQTL2.01	AC191961.3_FG009	Zm00001d002551	Zm00001eb072920					GRMZM2G051135
MQTL2.01	AC210678.3_FG004							GRMZM2G051270
MQTL2.01	AC217385.3_FG009							GRMZM2G051355
MQTL2.01	GRMZM2G000166	Zm00001d002496	Zm00001eb072430	103646010	heavy metal-associated isoprenylated plant protein 4			GRMZM2G051403
MQTL2.01	GRMZM2G003752	Zm00001d002607	Zm00001eb073440					GRMZM2G051738
MQTL2.01	GRMZM2G010011	Zm00001d002534	Zm00001eb072740	100279394	uncharacterized protein LOC100279394			GRMZM2G051852
MQTL2.01	GRMZM2G014005							GRMZM2G051879
MQTL2.01	GRMZM2G014009	Zm00001d002530	Zm00001eb072700					GRMZM2G052011
MQTL2.01	GRMZM2G014187	Zm00001d002531	Zm00001eb072710					GRMZM2G052036
MQTL2.01	GRMZM2G016705	Zm00001d002537	Zm00001eb072780	100276228	uncharacterized protein LOC100276228			GRMZM2G052067
MQTL2.01	GRMZM2G017197	Zm00001d002540	Zm00001eb072810	542224	calcium dependent protein kinase			GRMZM2G052193
MQTL2.01	GRMZM2G017197	Zm00001d002540	Zm00001eb072820					GRMZM2G052268
MQTL2.01	GRMZM2G019783	Zm00001d002682	Zm00001eb074120	100192871	alpha-L-fucosidase 1 precursor			GRMZM2G052277
MQTL2.01	GRMZM2G019783	Zm00001d002683	Zm00001eb074120	100192871	alpha-L-fucosidase 1 precursor			GRMZM2G052279
MQTL2.01	GRMZM2G019783	Zm00001d002682	Zm00001eb074130					GRMZM2G052323
MQTL2.01	GRMZM2G019783	Zm00001d002683	Zm00001eb074130					GRMZM2G052357
MQTL2.01	GRMZM2G019863	Zm00001d002684	Zm00001eb074140					GRMZM2G052386
MQTL2.01	GRMZM2G019876	Zm00001d002685	Zm00001eb074150					GRMZM2G052423
MQTL2.01	GRMZM2G020500	Zm00001d002687	Zm00001eb074170					GRMZM2G052467
MQTL2.01	GRMZM2G024312	Zm00001d002519	Zm00001eb072640	100303800	uncharacterized protein LOC100303800			GRMZM2G052476
MQTL2.01	GRMZM2G024517	Zm00001d002521	Zm00001eb072660					GRMZM2G052670
MQTL2.01	GRMZM2G027891	Zm00001d002679	Zm00001eb074090					GRMZM2G052796
MQTL2.01	GRMZM2G031904	Zm00001d002500	Zm00001eb072480					GRMZM2G052821
MQTL2.01	GRMZM2G031981	Zm00001d002501						GRMZM2G052884
MQTL2.01	GRMZM2G032218	Zm00001d002503	Zm00001eb072510	103646012	putative ABC transporter C family member 15 isoform X1			GRMZM2G053079
MQTL2.01	GRMZM2G032260	Zm00001d002504	Zm00001eb072520	100273578	Set1 complex component swd2			GRMZM2G053177
MQTL2.01	GRMZM2G032554	Zm00001d002505	Zm00001eb072530	103646013	nuclear poly(A) polymerase 4			GRMZM2G053466
MQTL2.01	GRMZM2G032583							GRMZM2G053480
MQTL2.01	GRMZM2G038835	Zm00001d002569	Zm00001eb073100					GRMZM2G053485
MQTL2.01	GRMZM2G038851	Zm00001d002570	Zm00001eb073110	103646037	SUMO-conjugating enzyme SCE1			GRMZM2G053500
MQTL2.01	GRMZM2G039455	Zm00001d002650	Zm00001eb073810	100304327	uncharacterized protein LOC100304327			GRMZM2G053507
MQTL2.01	GRMZM2G041506	Zm00001d002669	Zm00001eb073990					GRMZM2G053511
MQTL2.01	GRMZM2G042756	Zm00001d002618	Zm00001eb073550	100281239	dehydration-responsive element-binding protein 1D			GRMZM2G053531
MQTL2.01	GRMZM2G045398	Zm00001d002568	Zm00001eb073090					GRMZM2G053600
MQTL2.01	GRMZM2G050216	Zm00001d002565	Zm00001eb073040					GRMZM2G053692
MQTL2.01	GRMZM2G050234	Zm00001d002564	Zm00001eb073030					GRMZM2G053749
MQTL2.01	GRMZM2G050262							GRMZM2G053955
MQTL2.01	GRMZM2G054130							GRMZM2G053985
MQTL2.01	GRMZM2G057131	Zm00001d002661	Zm00001eb073910					GRMZM2G054123
MQTL2.01	GRMZM2G066489	Zm00001d002532	Zm00001eb072720	100279951	Glutamate receptor 3.3 precursor			GRMZM2G054193
MQTL2.01	GRMZM2G068128	Zm00001d002621	Zm00001eb073580	100281828	RING-H2 finger protein ATL2M			GRMZM2G054201
MQTL2.01	GRMZM2G069525	Zm00001d002649	Zm00001eb073790	100217256	uncharacterized protein LOC100217256			GRMZM2G054224
MQTL2.01	GRMZM2G076766							GRMZM2G054350
MQTL2.01	GRMZM2G076771	Zm00001d002550	Zm00001eb072910					GRMZM2G054548
MQTL2.01	GRMZM2G076844	Zm00001d002549	Zm00001eb072900					GRMZM2G054655
MQTL2.01	GRMZM2G080156	Zm00001d002600	Zm00001eb073390	100194237	uncharacterized protein LOC100194237 precursor			GRMZM2G054687
MQTL2.01	GRMZM2G080274	Zm00001d002601	Zm00001eb073400	541973	histone one (H1) 101			GRMZM2G055059
MQTL2.01	GRMZM2G080992	Zm00001d002623	Zm00001eb073590	100384534	putative MATE efflux family protein			GRMZM2G055070
MQTL2.01	GRMZM2G080992	Zm00001d002623	Zm00001eb073600					GRMZM2G055135
MQTL2.01	GRMZM2G081032	Zm00001d002624	Zm00001eb073610					GRMZM2G055141
MQTL2.01	GRMZM2G081032	Zm00001d002624	Zm00001eb073620					GRMZM2G055154
MQTL2.01	GRMZM2G081060	Zm00001d002624	Zm00001eb073610					GRMZM2G055309
MQTL2.01	GRMZM2G081060	Zm00001d002624	Zm00001eb073620					GRMZM2G055435
MQTL2.01	GRMZM2G082181	Zm00001d002663	Zm00001eb073930					GRMZM2G055458
MQTL2.01	GRMZM2G086210	Zm00001d002613	Zm00001eb073500					GRMZM2G055499
MQTL2.01	GRMZM2G086430	Zm00001d002614	Zm00001eb073510	100193704	uncharacterized protein LOC100193704			GRMZM2G055520
MQTL2.01	GRMZM2G086484	Zm00001d002615	Zm00001eb073520					GRMZM2G055545
MQTL2.01	GRMZM2G088601	Zm00001d002680	Zm00001eb074100					GRMZM2G055619
MQTL2.01	GRMZM2G092128	Zm00001d002498	Zm00001eb072440	103646011	E3 ubiquitin-protein ligase PUB23			GRMZM2G055682
MQTL2.01	GRMZM2G092190	Zm00001d002499	Zm00001eb072460	100279297	uncharacterized protein LOC100279297			GRMZM2G055973
MQTL2.01	GRMZM2G092190	Zm00001d002499	Zm00001eb072470					GRMZM2G056022
MQTL2.01	GRMZM2G098099	Zm00001d002524	Zm00001eb072690	103646017	FCS-Like Zinc finger 13			GRMZM2G056078
MQTL2.01	GRMZM2G100732	Zm00001d002510	Zm00001eb072560					GRMZM2G056093
MQTL2.01	GRMZM2G101333	Zm00001d002675	Zm00001eb074050	100284225	anther-specific proline-rich protein APG precursor			GRMZM2G056109
MQTL2.01	GRMZM2G101383	Zm00001d002676	Zm00001eb074060					GRMZM2G056151
MQTL2.01	GRMZM2G101408	Zm00001d002677	Zm00001eb074070	107648858	uncharacterized protein LOC107648858			GRMZM2G056166
MQTL2.01	GRMZM2G102059	Zm00001d002562	Zm00001eb073010	103646035	uncharacterized protein LOC103646035			GRMZM2G056236
MQTL2.01	GRMZM2G106881	Zm00001d002603	Zm00001eb073420					GRMZM2G056252
MQTL2.01	GRMZM2G106881	Zm00001d002603	Zm00001eb073430					GRMZM2G056350
MQTL2.01	GRMZM2G106921	Zm00001d002603	Zm00001eb073420					GRMZM2G056442
MQTL2.01	GRMZM2G106921	Zm00001d002603	Zm00001eb073430					GRMZM2G056762
MQTL2.01	GRMZM2G109865	Zm00001d002673	Zm00001eb074030	103646078	lysine histidine transporter-like 8			GRMZM2G056889
MQTL2.01	GRMZM2G109869	Zm00001d002573	Zm00001eb073130	103646038	scarecrow-like protein 8			GRMZM2G056903
MQTL2.01	GRMZM2G114131	Zm00001d002595	Zm00001eb073330	100286215	deoxyribonuclease ycfH			GRMZM2G057000
MQTL2.01	GRMZM2G114186	Zm00001d002596	Zm00001eb073340					GRMZM2G057065
MQTL2.01	GRMZM2G114192	Zm00001d002597	Zm00001eb073350	100194213	uncharacterized protein LOC100194213			GRMZM2G057078
MQTL2.01	GRMZM2G114220	Zm00001d002598	Zm00001eb073360	100282176	uncharacterized protein LOC100282176			GRMZM2G057131
MQTL2.01	GRMZM2G114276	Zm00001d002599	Zm00001eb073370					GRMZM2G057136
MQTL2.01	GRMZM2G117060	Zm00001d002656	Zm00001eb073870	103646072	protein CHROMATIN REMODELING 19			GRMZM2G057296
MQTL2.01	GRMZM2G120717	Zm00001d002547	Zm00001eb072880	103646029	uncharacterized LOC103646029			GRMZM2G057305
MQTL2.01	GRMZM2G120724	Zm00001d002548	Zm00001eb072890	100193290	alpha-expansin 13 precursor			GRMZM2G057329
MQTL2.01	GRMZM2G125494	Zm00001d002580	Zm00001eb073200	100193189	uncharacterized protein LOC100193189			GRMZM2G057352
MQTL2.01	GRMZM2G128179	Zm00001d002625	Zm00001eb073630	100384329	probable methyltransferase PMT15			GRMZM2G057386
MQTL2.01	GRMZM2G129261	Zm00001d002654	Zm00001eb073830	542199	uncharacterized protein LOC542199			GRMZM2G057437
MQTL2.01	GRMZM2G129386	Zm00001d002556	Zm00001eb072960					GRMZM2G057440
MQTL2.01	GRMZM2G129399	Zm00001d002558	Zm00001eb072980					GRMZM2G057466
MQTL2.01	GRMZM2G129450		Zm00001eb072990					GRMZM2G057554
MQTL2.01	GRMZM2G138886	Zm00001d002662	Zm00001eb073920					GRMZM2G057571
MQTL2.01	GRMZM2G142664	Zm00001d002668	Zm00001eb073980	100281432	uncharacterized protein LOC100281432			GRMZM2G057623
MQTL2.01	GRMZM2G142672	Zm00001d002666	Zm00001eb073960					GRMZM2G057690
MQTL2.01	GRMZM2G142672	Zm00001d002666	Zm00001eb073970					GRMZM2G057717
MQTL2.01	GRMZM2G145968	Zm00001d002659	Zm00001eb073900	541987	nucleosome/chromatin assembly factor D			GRMZM2G057749
MQTL2.01	GRMZM2G146847	Zm00001d002535	Zm00001eb072750					GRMZM2G057766
MQTL2.01	GRMZM2G146866	Zm00001d002536	Zm00001eb072760	103646021	probable L-type lectin-domain containing receptor kinase S.5			GRMZM2G057768
MQTL2.01	GRMZM2G146866	Zm00001d002536	Zm00001eb072770					GRMZM2G057789
MQTL2.01	GRMZM2G153378	Zm00001d002584	Zm00001eb073240					GRMZM2G057829
MQTL2.01	GRMZM2G153378	Zm00001d002585	Zm00001eb073240					GRMZM2G057907
MQTL2.01	GRMZM2G161902	Zm00001d002616	Zm00001eb073530	100276086	uncharacterized protein LOC100276086			GRMZM2G057958
MQTL2.01	GRMZM2G161913	Zm00001d002617	Zm00001eb073540	103646054	protein CTR9 homolog isoform X1			GRMZM2G058128
MQTL2.01	GRMZM2G162447	Zm00001d002517	Zm00001eb072630	103646016	cell wall / vacuolar inhibitor of fructosidase 2			GRMZM2G058149
MQTL2.01	GRMZM2G163067	Zm00001d002523	Zm00001eb072680	100277698	uncharacterized protein LOC100277698			GRMZM2G058292
MQTL2.01	GRMZM2G164318	Zm00001d002589	Zm00001eb073250	732775	beta-carotene hydroxylase			GRMZM2G058345
MQTL2.01	GRMZM2G164340	Zm00001d002590	Zm00001eb073260	100282364	nitrilase-associated protein			GRMZM2G058366
MQTL2.01	GRMZM2G164340	Zm00001d002590	Zm00001eb073270					GRMZM2G058432
MQTL2.01	GRMZM2G164378	Zm00001d002591	Zm00001eb073280	100216931	uncharacterized protein LOC100216931			GRMZM2G058491
MQTL2.01	GRMZM2G164405	Zm00001d002592	Zm00001eb073290	103646045	1-aminocyclopropane-1-carboxylate synthase			GRMZM2G058498
MQTL2.01	GRMZM2G164413	Zm00001d002593	Zm00001eb073300	100283711	uncharacterized protein LOC100283711			GRMZM2G058525
MQTL2.01	GRMZM2G164428	Zm00001d002594	Zm00001eb073310	107546774	uncharacterized protein LOC107546774			GRMZM2G058573
MQTL2.01	GRMZM2G169553	Zm00001d002515	Zm00001eb072610					GRMZM2G058930
MQTL2.01	GRMZM2G174807	Zm00001d002690	Zm00001eb074210	542434	aquaporin PIP1-1			GRMZM2G059010
MQTL2.01	GRMZM2G174807	Zm00001d002690	Zm00001eb074220					GRMZM2G059018
MQTL2.01	GRMZM2G175504	Zm00001d002688	Zm00001eb074180					GRMZM2G059179
MQTL2.01	GRMZM2G175504	Zm00001d002688	Zm00001eb074190					GRMZM2G059212
MQTL2.01	GRMZM2G175504	Zm00001d002688	Zm00001eb074200					GRMZM2G059266
MQTL2.01	GRMZM2G175728	Zm00001d002611	Zm00001eb073490					GRMZM2G059308
MQTL2.01	GRMZM2G176647	Zm00001d002658	Zm00001eb073880					GRMZM2G059325
MQTL2.01	GRMZM2G300111	Zm00001d002495	Zm00001eb072420	103646009	AT-hook motif nuclear-localized protein 23			GRMZM2G059393
MQTL2.01	GRMZM2G303118	Zm00001d002553	Zm00001eb072940					GRMZM2G059445
MQTL2.01	GRMZM2G303135	Zm00001d002609	Zm00001eb073470	100383878	uncharacterized protein LOC100383878			GRMZM2G059556
MQTL2.01	GRMZM2G303147							GRMZM2G059574
MQTL2.01	GRMZM2G314386	Zm00001d002538	Zm00001eb072790	100273127	uncharacterized protein LOC100273127			GRMZM2G059580
MQTL2.01	GRMZM2G314396	Zm00001d002540	Zm00001eb072810	542224	calcium dependent protein kinase			GRMZM2G059703
MQTL2.01	GRMZM2G314396	Zm00001d002540	Zm00001eb072820					GRMZM2G060319
MQTL2.01	GRMZM2G314412	Zm00001d002541	Zm00001eb072830	103646023	putative E3 ubiquitin-protein ligase LIN-2			GRMZM2G060444
MQTL2.01	GRMZM2G318408	Zm00001d002576	Zm00001eb073140					GRMZM2G060583
MQTL2.01	GRMZM2G318408	Zm00001d002576	Zm00001eb073150					GRMZM2G060659
MQTL2.01	GRMZM2G318527	Zm00001d002544	Zm00001eb072860	103646027	PH, RCC1 and FYVE domains-containing protein 1			GRMZM2G060690
MQTL2.01	GRMZM2G318956	Zm00001d002644	Zm00001eb073760	100381487	uncharacterized protein LOC100381487			GRMZM2G060712
MQTL2.01	GRMZM2G322817	Zm00001d002520	Zm00001eb072650	100274866	uncharacterized LOC100274866			GRMZM2G060834
MQTL2.01	GRMZM2G322819	Zm00001d002678	Zm00001eb074080	103646079	prolyl endopeptidase isoform X1			GRMZM2G060837
MQTL2.01	GRMZM2G341089	Zm00001d002572	Zm00001eb073120					GRMZM2G060919
MQTL2.01	GRMZM2G356273	Zm00001d002548	Zm00001eb072890	100193290	alpha-expansin 13 precursor			GRMZM2G061126
MQTL2.01	GRMZM2G368838	Zm00001d002620	Zm00001eb073560	100281151	uncharacterized protein LOC100281151			GRMZM2G061283
MQTL2.01	GRMZM2G384126	Zm00001d002665	Zm00001eb073940					GRMZM2G061527
MQTL2.01	GRMZM2G402837							GRMZM2G061537
MQTL2.01	GRMZM2G405064	Zm00001d002533	Zm00001eb072730					GRMZM2G061684
MQTL2.01	GRMZM2G410728	Zm00001d002671	Zm00001eb074010					GRMZM2G061764
MQTL2.01	GRMZM2G410728	Zm00001d002671	Zm00001eb074020					GRMZM2G061910
MQTL2.01	GRMZM2G421256	Zm00001d002545	Zm00001eb072870					GRMZM2G061938
MQTL2.01	GRMZM2G421279	Zm00001d002546						GRMZM2G062037
MQTL2.01	GRMZM2G426067	Zm00001d002579	Zm00001eb073180					GRMZM2G062052
MQTL2.01	GRMZM2G430500	Zm00001d002557	Zm00001eb072970					GRMZM2G062151
MQTL2.01	GRMZM2G464772	Zm00001d002566	Zm00001eb073060					GRMZM2G062320
MQTL2.01	GRMZM2G464772	Zm00001d002566	Zm00001eb073070					GRMZM2G062390
MQTL2.01	GRMZM2G476597	Zm00001d002610	Zm00001eb073480					GRMZM2G062455
MQTL2.01	GRMZM2G479665	Zm00001d002542	Zm00001eb072840	100382074	uncharacterized protein LOC100382074			GRMZM2G062559
MQTL2.01	GRMZM2G479684	Zm00001d002543	Zm00001eb072850	100192931	histone H4			GRMZM2G062826
MQTL2.01	GRMZM2G479684	Zm00001d002543	Zm00001eb072850	100278340	uncharacterized protein LOC100278340			GRMZM2G062944
MQTL2.01	GRMZM2G479684	Zm00001d002543	Zm00001eb072850	100282268	uncharacterized protein LOC100282268			GRMZM2G062953
MQTL2.01	GRMZM2G479684	Zm00001d002543	Zm00001eb072850	103631010	histone H4			GRMZM2G062996
MQTL2.01	GRMZM2G479684	Zm00001d002543	Zm00001eb072850	103634846	histone H4			GRMZM2G063156
MQTL2.01	GRMZM2G479684	Zm00001d002543	Zm00001eb072850	103635780	histone H4			GRMZM2G063322
MQTL2.01	GRMZM2G479684	Zm00001d002543	Zm00001eb072850	103636523	histone H4			GRMZM2G063392
MQTL2.01	GRMZM2G479684	Zm00001d002543	Zm00001eb072850	103646024	histone H4			GRMZM2G063806
MQTL2.01	GRMZM2G479684	Zm00001d002543	Zm00001eb072850	103646028	histone H4			GRMZM2G064159
MQTL2.01	GRMZM2G479684	Zm00001d002543	Zm00001eb072850	103649716	histone H4			GRMZM2G064193
MQTL2.01	GRMZM2G479684	Zm00001d002543	Zm00001eb072850	103651039	histone H4			GRMZM2G064219
MQTL2.01	GRMZM2G556131	Zm00001d002602	Zm00001eb073410	100282239	dihydrodipicolinate synthase 2			GRMZM2G064250
MQTL2.01	GRMZM2G702945							GRMZM2G064278
MQTL2.01	GRMZM2G702948							GRMZM2G064311
MQTL2.01	GRMZM5G834171	Zm00001d002678	Zm00001eb074080	103646079	prolyl endopeptidase isoform X1			GRMZM2G064320
MQTL2.02	AC185655.3_FG004	Zm00001d003341	Zm00001eb080020	103648578				GRMZM2G064360
MQTL2.02	AC185655.3_FG005	Zm00001d003342	Zm00001eb080030	103648579				GRMZM2G064541
MQTL2.02	AC213693.3_FG003	Zm00001d003347	Zm00001eb080090					GRMZM2G064580
MQTL2.02	AC213693.3_FG003	Zm00001d003347	Zm00001eb080100					GRMZM2G064584
MQTL2.02	AC215290.3_FG002	Zm00001d003335	Zm00001eb079990	103648575				GRMZM2G064613
MQTL2.02	GRMZM2G022637	Zm00001d003363	Zm00001eb080210					GRMZM2G064818
MQTL2.02	GRMZM2G022699	Zm00001d003365	Zm00001eb080230					GRMZM2G064868
MQTL2.02	GRMZM2G022797	Zm00001d003366	Zm00001eb080240					GRMZM2G065076
MQTL2.02	GRMZM2G022797	Zm00001d003367	Zm00001eb080250					GRMZM2G065125
MQTL2.02	GRMZM2G022797	Zm00001d003367	Zm00001eb080250					GRMZM2G065225
MQTL2.02	GRMZM2G027571	Zm00001d003345	Zm00001eb080070					GRMZM2G065244
MQTL2.02	GRMZM2G042443	Zm00001d003378	Zm00001eb080370	100502460	RNA-dependent DNA polymerase			GRMZM2G065284
MQTL2.02	GRMZM2G044548							GRMZM2G065292
MQTL2.02	GRMZM2G050435	Zm00001d003369	Zm00001eb080280					GRMZM2G065388
MQTL2.02	GRMZM2G050458	Zm00001d003370	Zm00001eb080290	103646344	uncharacterized protein LOC103646344			GRMZM2G065466
MQTL2.02	GRMZM2G050458	Zm00001d003370	Zm00001eb080300					GRMZM2G065692
MQTL2.02	GRMZM2G060712	Zm00001d003358	Zm00001eb080180					GRMZM2G065731
MQTL2.02	GRMZM2G102356	Zm00001d003379	Zm00001eb080380	542195	uncharacterized protein LOC542195			GRMZM2G065781
MQTL2.02	GRMZM2G102356	Zm00001d003379	Zm00001eb080390					GRMZM2G065939
MQTL2.02	GRMZM2G106810	Zm00001d003352	Zm00001eb080120	100274102	uncharacterized protein LOC100274102 precursor			GRMZM2G066059
MQTL2.02	GRMZM2G107003	Zm00001d003380	Zm00001eb080410	100280954	uncharacterized protein LOC100280954 precursor			GRMZM2G066107
MQTL2.02	GRMZM2G107199	Zm00001d003349	Zm00001eb080110					GRMZM2G066111
MQTL2.02	GRMZM2G110279	Zm00001d003386						GRMZM2G066162
MQTL2.02	GRMZM2G119967	Zm00001d003355	Zm00001eb080150					GRMZM2G066213
MQTL2.02	GRMZM2G119975	Zm00001d003356	Zm00001eb080160					GRMZM2G066480
MQTL2.02	GRMZM2G151418	Zm00001d003334	Zm00001eb079980	100193088	uncharacterized protein LOC100193088			GRMZM2G066489
MQTL2.02	GRMZM2G151434	Zm00001d003333	Zm00001eb079970	103646329	uncharacterized protein LOC103646329			GRMZM2G066500
MQTL2.02	GRMZM2G155491	Zm00001d003343	Zm00001eb080050	100285834	AAP7			GRMZM2G066578
MQTL2.02	GRMZM2G168968	Zm00001d003397	Zm00001eb080530					GRMZM2G066599
MQTL2.02	GRMZM2G177070	Zm00001d003373	Zm00001eb080320					GRMZM2G066700
MQTL2.02	GRMZM2G179253	Zm00001d003376	Zm00001eb080350	100278581	uncharacterized protein LOC100278581			GRMZM2G066726
MQTL2.02	GRMZM2G179253	Zm00001d003377	Zm00001eb080350	100278581	uncharacterized protein LOC100278581			GRMZM2G066735
MQTL2.02	GRMZM2G179268	Zm00001d003376	Zm00001eb080360					GRMZM2G066815
MQTL2.02	GRMZM2G179268	Zm00001d003376	Zm00001eb080360					GRMZM2G067183
MQTL2.02	GRMZM2G179268	Zm00001d003377	Zm00001eb080360					GRMZM2G067223
MQTL2.02	GRMZM2G179268	Zm00001d003377	Zm00001eb080360					GRMZM2G067231
MQTL2.02	GRMZM2G301194	Zm00001d003368	Zm00001eb080260	100381510	uncharacterized protein LOC100381510			GRMZM2G067242
MQTL2.02	GRMZM2G326631	Zm00001d003336						GRMZM2G067257
MQTL2.02	GRMZM2G327295	Zm00001d003364	Zm00001eb080220					GRMZM2G067277
MQTL2.02	GRMZM2G330430	Zm00001d003347	Zm00001eb080090					GRMZM2G067379
MQTL2.02	GRMZM2G330430	Zm00001d003347	Zm00001eb080100					GRMZM2G067462
MQTL2.02	GRMZM2G350955							GRMZM2G067511
MQTL2.02	GRMZM2G370507	Zm00001d003353	Zm00001eb080130					GRMZM2G067549
MQTL2.02	GRMZM2G404682	Zm00001d003357	Zm00001eb080170					GRMZM2G067553
MQTL2.02	GRMZM2G408598	Zm00001d003372	Zm00001eb080310	103646346	uncharacterized protein LOC103646346			GRMZM2G067591
MQTL2.02	GRMZM2G408963	Zm00001d003381	Zm00001eb080420					GRMZM2G067630
MQTL2.02	GRMZM2G479018	Zm00001d003354	Zm00001eb080140	103646334	ABC transporter G family member 51			GRMZM2G067642
MQTL2.02	GRMZM2G526267	Zm00001d003375	Zm00001eb080340	103646349	uncharacterized protein LOC103646349			GRMZM2G067648
MQTL2.02	GRMZM2G547723							GRMZM2G067764
MQTL2.02	GRMZM5G804251							GRMZM2G068128
MQTL2.02	GRMZM5G816457	Zm00001d003331	Zm00001eb079950	100383070	uncharacterized protein LOC100383070			GRMZM2G068149
MQTL2.02	GRMZM5G869350	Zm00001d003382	Zm00001eb080440	100381656	Sterile alpha motif (SAM) domain-containing protein			GRMZM2G068239
MQTL2.03	AC194705.3_FG004							GRMZM2G068316
MQTL2.03	GRMZM2G009125	Zm00001d003483	Zm00001eb081210					GRMZM2G068382
MQTL2.03	GRMZM2G010338	Zm00001d003474	Zm00001eb081180					GRMZM2G068455
MQTL2.03	GRMZM2G010338	Zm00001d003475	Zm00001eb081180					GRMZM2G068566
MQTL2.03	GRMZM2G015610	Zm00001d003509	Zm00001eb081430	100284946	catalytic/ protein phosphatase type 2C			GRMZM2G068590
MQTL2.03	GRMZM2G015844	Zm00001d003508	Zm00001eb081420					GRMZM2G068707
MQTL2.03	GRMZM2G021319	Zm00001d003543	Zm00001eb081680					GRMZM2G068917
MQTL2.03	GRMZM2G021459	Zm00001d003545	Zm00001eb081690					GRMZM2G068947
MQTL2.03	GRMZM2G021464	Zm00001d003546	Zm00001eb081700					GRMZM2G069093
MQTL2.03	GRMZM2G021464	Zm00001d003546	Zm00001eb081710					GRMZM2G069095
MQTL2.03	GRMZM2G021831	Zm00001d003549	Zm00001eb081720					GRMZM2G069169
MQTL2.03	GRMZM2G024119	Zm00001d003491	Zm00001eb081250					GRMZM2G069174
MQTL2.03	GRMZM2G031028	Zm00001d003470	Zm00001eb081140	100284078	uncharacterized protein LOC100284078			GRMZM2G069208
MQTL2.03	GRMZM2G046402	Zm00001d003518	Zm00001eb081510	100273515	uncharacterized protein LOC100273515			GRMZM2G069251
MQTL2.03	GRMZM2G046900	Zm00001d003504	Zm00001eb081380					GRMZM2G069295
MQTL2.03	GRMZM2G049549	Zm00001d003477	Zm00001eb081200	100194126	uncharacterized protein LOC100194126			GRMZM2G069316
MQTL2.03	GRMZM2G049568	Zm00001d003476	Zm00001eb081190	100304268	putative ubiquitin carboxyl-terminal hydrolase superfamily protein			GRMZM2G069523
MQTL2.03	GRMZM2G051355	Zm00001d003525	Zm00001eb081580	100282911				GRMZM2G069525
MQTL2.03	GRMZM2G053985	Zm00001d003521	Zm00001eb081540					GRMZM2G069630
MQTL2.03	GRMZM2G061495	Zm00001d003473	Zm00001eb081170					GRMZM2G069672
MQTL2.03	GRMZM2G062559	Zm00001d003515	Zm00001eb081480					GRMZM2G069676
MQTL2.03	GRMZM2G092107	Zm00001d003464	Zm00001eb081110					GRMZM2G069708
MQTL2.03	GRMZM2G101069	Zm00001d003531	Zm00001eb081600	100284551	uncharacterized protein LOC100284551			GRMZM2G069736
MQTL2.03	GRMZM2G103050	Zm00001d003529						GRMZM2G069758
MQTL2.03	GRMZM2G104843	Zm00001d003533	Zm00001eb081610					GRMZM2G069762
MQTL2.03	GRMZM2G104843	Zm00001d003533	Zm00001eb081620					GRMZM2G069830
MQTL2.03	GRMZM2G105542	Zm00001d003534	Zm00001eb081630	100272731	uncharacterized protein LOC100272731			GRMZM2G069856
MQTL2.03	GRMZM2G105608	Zm00001d003535						GRMZM2G069905
MQTL2.03	GRMZM2G105617							GRMZM2G069923
MQTL2.03	GRMZM2G126062	Zm00001d003524	Zm00001eb081570					GRMZM2G069970
MQTL2.03	GRMZM2G127139	Zm00001d003512	Zm00001eb081460					GRMZM2G070111
MQTL2.03	GRMZM2G127139	Zm00001d003513	Zm00001eb081460					GRMZM2G070255
MQTL2.03	GRMZM2G127139	Zm00001d003512	Zm00001eb081470					GRMZM2G070271
MQTL2.03	GRMZM2G127139	Zm00001d003513	Zm00001eb081470					GRMZM2G070279
MQTL2.03	GRMZM2G127173	Zm00001d003511	Zm00001eb081450					GRMZM2G070295
MQTL2.03	GRMZM2G127184	Zm00001d003510	Zm00001eb081440	103646383	probable fucosyltransferase 7			GRMZM2G070448
MQTL2.03	GRMZM2G131321	Zm00001d003539	Zm00001eb081650	100282505	uncharacterized protein LOC100282505			GRMZM2G070454
MQTL2.03	GRMZM2G131448	Zm00001d003540	Zm00001eb081660	100277138	uncharacterized protein LOC100277138			GRMZM2G070462
MQTL2.03	GRMZM2G145758	Zm00001d003493	Zm00001eb081270	100381287	histone H3.3			GRMZM2G070639
MQTL2.03	GRMZM2G160966	Zm00001d003499	Zm00001eb081330					GRMZM2G070649
MQTL2.03	GRMZM2G160994	Zm00001d003500	Zm00001eb081350					GRMZM2G070693
MQTL2.03	GRMZM2G161012	Zm00001d003501	Zm00001eb081360	103646379	esterase OVCA2			GRMZM2G071042
MQTL2.03	GRMZM2G167262	Zm00001d003502	Zm00001eb081370	100282410	signal recognition particle 19 kDa protein			GRMZM2G071071
MQTL2.03	GRMZM2G167262	Zm00001d003502	Zm00001eb081370	103645776	signal recognition particle 19 kDa protein			GRMZM2G071264
MQTL2.03	GRMZM2G171254	Zm00001d003494	Zm00001eb081280	100272664	uncharacterized protein LOC100272664			GRMZM2G071277
MQTL2.03	GRMZM2G171254	Zm00001d003495	Zm00001eb081280	100272664	uncharacterized protein LOC100272664			GRMZM2G071325
MQTL2.03	GRMZM2G171254	Zm00001d003496	Zm00001eb081280	100272664	uncharacterized protein LOC100272664			GRMZM2G071360
MQTL2.03	GRMZM2G171254	Zm00001d003494	Zm00001eb081310					GRMZM2G071390
MQTL2.03	GRMZM2G171254	Zm00001d003495	Zm00001eb081310					GRMZM2G071468
MQTL2.03	GRMZM2G171254	Zm00001d003496	Zm00001eb081310					GRMZM2G071518
MQTL2.03	GRMZM2G171277	Zm00001d003497	Zm00001eb081320	100272434	putative RING zinc finger domain superfamily protein			GRMZM2G071575
MQTL2.03	GRMZM2G171296	Zm00001d003482						GRMZM2G071589
MQTL2.03	GRMZM2G314110	Zm00001d003544						GRMZM2G071620
MQTL2.03	GRMZM2G325139	Zm00001d003485	Zm00001eb081220					GRMZM2G071626
MQTL2.03	GRMZM2G345238	Zm00001d003516	Zm00001eb081500					GRMZM2G071688
MQTL2.03	GRMZM2G345238	Zm00001d003517	Zm00001eb081500					GRMZM2G071745
MQTL2.03	GRMZM2G347488	Zm00001d003505	Zm00001eb081390					GRMZM2G071844
MQTL2.03	GRMZM2G347489		Zm00001eb081400					GRMZM2G071871
MQTL2.03	GRMZM2G355906	Zm00001d003522	Zm00001eb081550	100273302	uncharacterized protein LOC100273302			GRMZM2G071970
MQTL2.03	GRMZM2G360374	Zm00001d003473						GRMZM2G072029
MQTL2.03	GRMZM2G399383	Zm00001d003538	Zm00001eb081640					GRMZM2G072071
MQTL2.03	GRMZM2G408038	Zm00001d003530	Zm00001eb081590					GRMZM2G072231
MQTL2.03	GRMZM2G417770	Zm00001d003489						GRMZM2G072315
MQTL2.03	GRMZM2G441748							GRMZM2G072407
MQTL2.03	GRMZM2G442523	Zm00001d003468	Zm00001eb081120	100285394	sugar transport protein 5			GRMZM2G072417
MQTL2.03	GRMZM2G442546	Zm00001d003469	Zm00001eb081130	100383620	uncharacterized protein LOC100383620			GRMZM2G072621
MQTL2.03	GRMZM2G470882	Zm00001d003495	Zm00001eb081290	110117500	uncharacterized protein LOC110117500			GRMZM2G072658
MQTL2.03	GRMZM2G470882	Zm00001d003495	Zm00001eb081290	110117500	uncharacterized protein LOC110117500			GRMZM2G072865
MQTL2.03	GRMZM2G470882	Zm00001d003496	Zm00001eb081290	110117500	uncharacterized protein LOC110117500			GRMZM2G072909
MQTL2.03	GRMZM2G470882	Zm00001d003496	Zm00001eb081290	110117500	uncharacterized protein LOC110117500			GRMZM2G072911
MQTL2.03	GRMZM2G470882	Zm00001d003495	Zm00001eb081310					GRMZM2G072965
MQTL2.03	GRMZM2G470882	Zm00001d003496	Zm00001eb081310					GRMZM2G073017
MQTL2.03	GRMZM2G470882	Zm00001d003494						GRMZM2G073023
MQTL2.03	GRMZM2G471039	Zm00001d003494	Zm00001eb081290	110117500	uncharacterized protein LOC110117500			GRMZM2G073034
MQTL2.03	GRMZM2G471039	Zm00001d003494	Zm00001eb081290	110117500	uncharacterized protein LOC110117500			GRMZM2G073047
MQTL2.03	GRMZM2G471039	Zm00001d003494	Zm00001eb081310					GRMZM2G073114
MQTL2.03	GRMZM2G471039	Zm00001d003495						GRMZM2G073351
MQTL2.03	GRMZM2G471039	Zm00001d003496						GRMZM2G073578
MQTL2.03	GRMZM2G474783	Zm00001d003520	Zm00001eb081530	103646384	uncharacterized protein LOC103646384			GRMZM2G074037
MQTL2.03	GRMZM2G703021	Zm00001d003492	Zm00001eb081260	100384264	uncharacterized protein LOC100384264			GRMZM2G074053
MQTL2.03	GRMZM5G831135	Zm00001d003473	Zm00001eb081170					GRMZM2G074103
MQTL2.03	GRMZM5G837621							GRMZM2G074211
MQTL2.03	GRMZM5G843141	Zm00001d003471	Zm00001eb081160					GRMZM2G074233
MQTL2.03	GRMZM5G870067	Zm00001d003488	Zm00001eb081230	100501354	uncharacterized protein LOC100501354			GRMZM2G074239
MQTL2.03	GRMZM5G889338	Zm00001d003514						GRMZM2G074245
MQTL2.03	GRMZM5G896728							GRMZM2G074282
MQTL2.04	AC177920.3_FG008							GRMZM2G074300
MQTL2.04	AC211253.3_FG002	Zm00001d003703						GRMZM2G074306
MQTL2.04	AC213619.3_FG005							GRMZM2G074307
MQTL2.04	AC217049.2_FG002							GRMZM2G074373
MQTL2.04	AC233967.1_FG001	Zm00001d003729	Zm00001eb083370					GRMZM2G074443
MQTL2.04	AC233967.1_FG002	Zm00001d003728	Zm00001eb083350					GRMZM2G074546
MQTL2.04	GRMZM2G014651	Zm00001d003702	Zm00001eb083110					GRMZM2G074549
MQTL2.04	GRMZM2G014905	Zm00001d003701	Zm00001eb083100	100382508	uncharacterized protein LOC100382508			GRMZM2G074689
MQTL2.04	GRMZM2G017643	Zm00001d003718	Zm00001eb083240	100278053	uncharacterized protein LOC100278053			GRMZM2G074850
MQTL2.04	GRMZM2G035948	Zm00001d003663	Zm00001eb082750					GRMZM2G075018
MQTL2.04	GRMZM2G044132	Zm00001d003712	Zm00001eb083180					GRMZM2G075027
MQTL2.04	GRMZM2G044681	Zm00001d003713	Zm00001eb083200	100304442	Exocyst complex component SEC5A			GRMZM2G075051
MQTL2.04	GRMZM2G044681	Zm00001d003714	Zm00001eb083200	100304442	Exocyst complex component SEC5A			GRMZM2G075056
MQTL2.04	GRMZM2G050861	Zm00001d003673	Zm00001eb082860	100274438	uncharacterized protein LOC100274438			GRMZM2G075101
MQTL2.04	GRMZM2G050925	Zm00001d003672	Zm00001eb082850					GRMZM2G075158
MQTL2.04	GRMZM2G064162	Zm00001d003699	Zm00001eb083090	100192471				GRMZM2G075161
MQTL2.04	GRMZM2G069093	Zm00001d003707	Zm00001eb083140	100216859	Peroxidase 72 precursor			GRMZM2G075222
MQTL2.04	GRMZM2G074546	Zm00001d003676	Zm00001eb082890					GRMZM2G075250
MQTL2.04	GRMZM2G078650	Zm00001d003671	Zm00001eb082840					GRMZM2G075253
MQTL2.04	GRMZM2G091717	Zm00001d003660	Zm00001eb082730					GRMZM2G075257
MQTL2.04	GRMZM2G107588	Zm00001d003685	Zm00001eb082980	100273709	uncharacterized protein LOC100273709			GRMZM2G075265
MQTL2.04	GRMZM2G109677	Zm00001d003680	Zm00001eb082930	101027258	60S ribosomal protein L3			GRMZM2G075283
MQTL2.04	GRMZM2G109677	Zm00001d003680	Zm00001eb082930	103646454	60S ribosomal protein L3			GRMZM2G075372
MQTL2.04	GRMZM2G109677	Zm00001d003680	Zm00001eb082930	103647029	60S ribosomal protein L3			GRMZM2G075496
MQTL2.04	GRMZM2G109677	Zm00001d003680	Zm00001eb082930	103647030	60S ribosomal protein L3			GRMZM2G075562
MQTL2.04	GRMZM2G109677	Zm00001d003680	Zm00001eb082940					GRMZM2G075631
MQTL2.04	GRMZM2G110332		Zm00001eb082950					GRMZM2G075655
MQTL2.04	GRMZM2G113425							GRMZM2G075690
MQTL2.04	GRMZM2G124473	Zm00001d003715	Zm00001eb083210	100286112	structural molecule			GRMZM2G075780
MQTL2.04	GRMZM2G131155	Zm00001d003669	Zm00001eb082820	100383970	uncharacterized protein LOC100383970			GRMZM2G075844
MQTL2.04	GRMZM2G131177	Zm00001d003668	Zm00001eb082810	103646447	subtilisin-like protease SBT1.7			GRMZM2G075900
MQTL2.04	GRMZM2G131177	Zm00001d003668	Zm00001eb082800					GRMZM2G076263
MQTL2.04	GRMZM2G131202	Zm00001d003667	Zm00001eb082790	103646448	uncharacterized protein LOC103646448 isoform X3			GRMZM2G076272
MQTL2.04	GRMZM2G134432	Zm00001d003723	Zm00001eb083290					GRMZM2G076313
MQTL2.04	GRMZM2G135727	Zm00001d003683	Zm00001eb082960	101027258	60S ribosomal protein L3			GRMZM2G076327
MQTL2.04	GRMZM2G135727	Zm00001d003683	Zm00001eb082960	103646454	60S ribosomal protein L3			GRMZM2G076345
MQTL2.04	GRMZM2G135727	Zm00001d003683	Zm00001eb082960	103647029	60S ribosomal protein L3			GRMZM2G076351
MQTL2.04	GRMZM2G135727	Zm00001d003683	Zm00001eb082960	103647030	60S ribosomal protein L3			GRMZM2G076389
MQTL2.04	GRMZM2G142111	Zm00001d003684	Zm00001eb082970	100272445	ribonuclease P			GRMZM2G076392
MQTL2.04	GRMZM2G147619	Zm00001d003679	Zm00001eb082920	542678	SET domain-containing protein SET102			GRMZM2G076398
MQTL2.04	GRMZM2G147667	Zm00001d003678	Zm00001eb082910	100193497	Ubiquitin carboxyl-terminal hydrolase			GRMZM2G076415
MQTL2.04	GRMZM2G147685	Zm00001d003677	Zm00001eb082900					GRMZM2G076526
MQTL2.04	GRMZM2G148198	Zm00001d003724	Zm00001eb083300					GRMZM2G076562
MQTL2.04	GRMZM2G155150	Zm00001d003661	Zm00001eb082740					GRMZM2G076613
MQTL2.04	GRMZM2G155593	Zm00001d003659	Zm00001eb082720					GRMZM2G076766
MQTL2.04	GRMZM2G155626	Zm00001d003658	Zm00001eb082710	100272448	uncharacterized protein LOC100272448			GRMZM2G076771
MQTL2.04	GRMZM2G157822	Zm00001d003690	Zm00001eb083010					GRMZM2G076844
MQTL2.04	GRMZM2G157869	Zm00001d003689	Zm00001eb083000					GRMZM2G076885
MQTL2.04	GRMZM2G159246	Zm00001d003696	Zm00001eb083060	100192525	putative DUF1618 domain containing family protein			GRMZM2G076936
MQTL2.04	GRMZM2G159481							GRMZM2G077034
MQTL2.04	GRMZM2G168651		Zm00001eb083400					GRMZM2G077088
MQTL2.04	GRMZM2G173218	Zm00001d003706	Zm00001eb083130					GRMZM2G077114
MQTL2.04	GRMZM2G177561	Zm00001d003675	Zm00001eb082880					GRMZM2G077295
MQTL2.04	GRMZM2G302592	Zm00001d003722	Zm00001eb083280					GRMZM2G077317
MQTL2.04	GRMZM2G329885	Zm00001d003664	Zm00001eb082760	103646446	uncharacterized protein At4g26450 isoform X1			GRMZM2G077336
MQTL2.04	GRMZM2G362803	Zm00001d003717	Zm00001eb083230					GRMZM2G077356
MQTL2.04	GRMZM2G368698	Zm00001d003709	Zm00001eb083160	100286362	uncharacterized protein LOC100286362 precursor			GRMZM2G077389
MQTL2.04	GRMZM2G391511	Zm00001d003674	Zm00001eb082870					GRMZM2G077404
MQTL2.04	GRMZM2G401062	Zm00001d003710	Zm00001eb083170	103646467	protein SET DOMAIN GROUP 41 isoform X1			GRMZM2G077588
MQTL2.04	GRMZM2G402645							GRMZM2G077797
MQTL2.04	GRMZM2G406196	Zm00001d003719	Zm00001eb083250					GRMZM2G077863
MQTL2.04	GRMZM2G420280	Zm00001d003657	Zm00001eb082700					GRMZM2G077897
MQTL2.04	GRMZM2G421835	Zm00001d003716	Zm00001eb083220	103648659	WAT1-related protein At1g68170			GRMZM2G077960
MQTL2.04	GRMZM2G447984	Zm00001d003725	Zm00001eb083310	100192589	histone H3.2			GRMZM2G077991
MQTL2.04	GRMZM2G447984	Zm00001d003725	Zm00001eb083310	103638044	histone H3.2			GRMZM2G078052
MQTL2.04	GRMZM2G447984	Zm00001d003725	Zm00001eb083310	103641629	histone H3.2			GRMZM2G078641
MQTL2.04	GRMZM2G447984	Zm00001d003725	Zm00001eb083310	103646477	histone H3.2			GRMZM2G078650
MQTL2.04	GRMZM2G447984	Zm00001d003725	Zm00001eb083310	103653610	histone H3.2			GRMZM2G078804
MQTL2.04	GRMZM2G458879	Zm00001d003666	Zm00001eb082770					GRMZM2G078895
MQTL2.04	GRMZM2G458879	Zm00001d003666	Zm00001eb082780					GRMZM2G079031
MQTL2.04	GRMZM2G506790							GRMZM2G079050
MQTL2.04	GRMZM2G511717							GRMZM2G079196
MQTL2.04	GRMZM2G541230	Zm00001d003695	Zm00001eb083050					GRMZM2G079321
MQTL2.04	GRMZM2G546593							GRMZM2G079342
MQTL2.04	GRMZM2G577718							GRMZM2G079343
MQTL2.04	GRMZM2G586126							GRMZM2G079352
MQTL2.04	GRMZM2G703050							GRMZM2G079417
MQTL2.04	GRMZM5G806108	Zm00001d003670	Zm00001eb082830					GRMZM2G079484
MQTL2.04	GRMZM5G806182	Zm00001d003712	Zm00001eb083180					GRMZM2G079653
MQTL2.04	GRMZM5G856002							GRMZM2G079768
MQTL2.04	GRMZM5G864735	Zm00001d003730	Zm00001eb083380	100192589	histone H3.2			GRMZM2G079777
MQTL2.04	GRMZM5G864735	Zm00001d003730	Zm00001eb083380	103638044	histone H3.2			GRMZM2G079925
MQTL2.04	GRMZM5G864735	Zm00001d003730	Zm00001eb083380	103641629	histone H3.2			GRMZM2G080083
MQTL2.04	GRMZM5G864735	Zm00001d003730	Zm00001eb083380	103646477	histone H3.2			GRMZM2G080107
MQTL2.04	GRMZM5G864735	Zm00001d003730	Zm00001eb083380	103653610	histone H3.2			GRMZM2G080129
MQTL2.04	GRMZM5G877649		Zm00001eb082950					GRMZM2G080156
MQTL2.04	GRMZM5G894029	Zm00001d003728	Zm00001eb083360					GRMZM2G080169
MQTL2.04	GRMZM5G894029	Zm00001d003728	Zm00001eb083360					GRMZM2G080178
MQTL2.05	AC191073.2_FG001		Zm00001eb084640					GRMZM2G080274
MQTL2.05	AC191073.2_FG003	Zm00001d003860	Zm00001eb084610					GRMZM2G080281
MQTL2.05	AC191073.2_FG003	Zm00001d003860	Zm00001eb084620					GRMZM2G080442
MQTL2.05	GRMZM2G014695	Zm00001d003866	Zm00001eb084690	100192493	uncharacterized protein LOC100192493			GRMZM2G080594
MQTL2.05	GRMZM2G016749	Zm00001d000124	Zm00001eb084510	100282590	uncharacterized protein LOC100282590			GRMZM2G080689
MQTL2.05	GRMZM2G021059	Zm00001d003856	Zm00001eb084580					GRMZM2G080839
MQTL2.05	GRMZM2G023946	Zm00001d003848	Zm00001eb084430	100193923	uncharacterized protein LOC100193923			GRMZM2G080906
MQTL2.05	GRMZM2G032225	Zm00001d003865	Zm00001eb084680					GRMZM2G080992
MQTL2.05	GRMZM2G032430	Zm00001d003867						GRMZM2G081016
MQTL2.05	GRMZM2G033247							GRMZM2G081032
MQTL2.05	GRMZM2G038604	Zm00001d003863	Zm00001eb084650					GRMZM2G081060
MQTL2.05	GRMZM2G038604	Zm00001d003863	Zm00001eb084660					GRMZM2G081441
MQTL2.05	GRMZM2G041312	Zm00001d003864	Zm00001eb084670	100284094	SNF4			GRMZM2G081474
MQTL2.05	GRMZM2G068590	Zm00001d003850	Zm00001eb084550	100281271	inhibitor of apoptosis-like protein			GRMZM2G081500
MQTL2.05	GRMZM2G069708	Zm00001d000123	Zm00001eb084520	100274377	3-beta hydroxysteroid dehydrogenase/isomerase family protein			GRMZM2G081504
MQTL2.05	GRMZM2G069856	Zm00001d000122	Zm00001eb084530	100382237	uncharacterized protein LOC100382237			GRMZM2G081538
MQTL2.05	GRMZM2G085238							GRMZM2G081577
MQTL2.05	GRMZM2G085260	Zm00001d000128	Zm00001eb084480					GRMZM2G081603
MQTL2.05	GRMZM2G093826	Zm00001d003861	Zm00001eb084630					GRMZM2G082180
MQTL2.05	GRMZM2G122239	Zm00001d003855	Zm00001eb084570	100281212	uncharacterized protein LOC100281212			GRMZM2G082181
MQTL2.05	GRMZM2G134668	Zm00001d003857	Zm00001eb084590	100283947	calnexin precursor			GRMZM2G082271
MQTL2.05	GRMZM2G154223	Zm00001d000126						GRMZM2G082385
MQTL2.05	GRMZM2G157269	Zm00001d000133	Zm00001eb084450	103646525	acetyl-coenzyme A synthetase, chloroplastic/glyoxysomal			GRMZM2G082836
MQTL2.05	GRMZM2G165063	Zm00001d003852	Zm00001eb084560					GRMZM2G082906
MQTL2.05	GRMZM2G320941	Zm00001d000134	Zm00001eb084440	103646524	two-component response regulator ORR29			GRMZM2G082924
MQTL2.05	GRMZM2G329737		Zm00001eb084700					GRMZM2G083239
MQTL2.05	GRMZM2G395267	Zm00001d003859	Zm00001eb084600					GRMZM2G083643
MQTL2.05	GRMZM2G422938	Zm00001d003851	Zm00001eb084540	100273593	uncharacterized protein LOC100273593			GRMZM2G083655
MQTL2.05	GRMZM2G432525		Zm00001eb084460					GRMZM2G083841
MQTL2.05	GRMZM2G432525		Zm00001eb084470					GRMZM2G083875
MQTL2.05	GRMZM2G454637		Zm00001eb084500	103646526	uncharacterized protein LOC103646526			GRMZM2G083935
MQTL2.05	GRMZM5G842686	Zm00001d003850	Zm00001eb084550	100281271	inhibitor of apoptosis-like protein			GRMZM2G084005
MQTL2.06	AC190613.3_FG001	Zm00001d004040						GRMZM2G084130
MQTL2.06	AC197697.3_FG001							GRMZM2G084173
MQTL2.06	AC206642.4_FG001	Zm00001d004052	Zm00001eb086050					GRMZM2G084242
MQTL2.06	GRMZM2G005114	Zm00001d004065	Zm00001eb086150					GRMZM2G084521
MQTL2.06	GRMZM2G005114	Zm00001d004066	Zm00001eb086150					GRMZM2G084597
MQTL2.06	GRMZM2G010765	Zm00001d004055	Zm00001eb086100	100191687	uncharacterized protein LOC100191687			GRMZM2G084942
MQTL2.06	GRMZM2G022884	Zm00001d004071	Zm00001eb086170					GRMZM2G084947
MQTL2.06	GRMZM2G037955							GRMZM2G085049
MQTL2.06	GRMZM2G052386	Zm00001d004072	Zm00001eb086180					GRMZM2G085089
MQTL2.06	GRMZM2G069174	Zm00001d004070	Zm00001eb086160					GRMZM2G085117
MQTL2.06	GRMZM2G069523	Zm00001d004048	Zm00001eb086030	103646611	momilactone A synthase			GRMZM2G085238
MQTL2.06	GRMZM2G076351	Zm00001d004051	Zm00001eb086040	100284331	mitochondrial import inner membrane translocase subunit Tim17 family protein			GRMZM2G085260
MQTL2.06	GRMZM2G126856	Zm00001d004046	Zm00001eb086010					GRMZM2G085504
MQTL2.06	GRMZM2G137002							GRMZM2G085568
MQTL2.06	GRMZM2G157027	Zm00001d004075	Zm00001eb086200	100193518	nucleotide pyrophosphatase/phosphodiesterase precursor			GRMZM2G085573
MQTL2.06	GRMZM2G157027	Zm00001d004075	Zm00001eb086210					GRMZM2G085613
MQTL2.06	GRMZM2G173833	Zm00001d004057						GRMZM2G085646
MQTL2.06	GRMZM2G174092		Zm00001eb086120					GRMZM2G085747
MQTL2.06	GRMZM2G178321							GRMZM2G085825
MQTL2.06	GRMZM2G334680							GRMZM2G085836
MQTL2.06	GRMZM2G351023	Zm00001d004042	Zm00001eb086000					GRMZM2G085845
MQTL2.06	GRMZM2G369243	Zm00001d004067						GRMZM2G086069
MQTL2.06	GRMZM2G475482							GRMZM2G086116
MQTL2.06	GRMZM2G557750							GRMZM2G086117
MQTL2.06	GRMZM2G587865							GRMZM2G086210
MQTL2.06	GRMZM2G703092							GRMZM2G086237
MQTL2.06	GRMZM5G804773	Zm00001d004053	Zm00001eb086060	100275755	uncharacterized protein LOC100275755			GRMZM2G086287
MQTL2.06	GRMZM5G804773	Zm00001d004053	Zm00001eb086070					GRMZM2G086346
MQTL2.06	GRMZM5G804773	Zm00001d004053	Zm00001eb086090					GRMZM2G086430
MQTL2.06	GRMZM5G817582							GRMZM2G086441
MQTL2.06	GRMZM5G832821							GRMZM2G086450
MQTL2.06	GRMZM5G837568							GRMZM2G086484
MQTL2.06	GRMZM5G860828							GRMZM2G086496
MQTL2.06	GRMZM5G874179							GRMZM2G086497
MQTL2.07	AC190507.1_FG007	Zm00001d004192						GRMZM2G086587
MQTL2.07	AC200178.2_FG002							GRMZM2G086757
MQTL2.07	AC200178.2_FG003	Zm00001d004252	Zm00001eb087430					GRMZM2G086789
MQTL2.07	AC206199.3_FG001							GRMZM2G087105
MQTL2.07	AC206199.3_FG005		Zm00001eb086930					GRMZM2G087111
MQTL2.07	AC211976.4_FG002							GRMZM2G087212
MQTL2.07	AC212447.3_FG001	Zm00001d004225						GRMZM2G087222
MQTL2.07	AC220954.3_FG005							GRMZM2G087332
MQTL2.07	GRMZM2G010494	Zm00001d004171	Zm00001eb086870					GRMZM2G087395
MQTL2.07	GRMZM2G013357	Zm00001d004167	Zm00001eb086830	100192487	uncharacterized protein LOC100192487			GRMZM2G087413
MQTL2.07	GRMZM2G013357	Zm00001d004167	Zm00001eb086840					GRMZM2G087435
MQTL2.07	GRMZM2G027307	Zm00001d004169	Zm00001eb086860	100382953	palmitoyltransferase ZDHHC20			GRMZM2G087482
MQTL2.07	GRMZM2G028313	Zm00001d004172	Zm00001eb086880	103646667	eukaryotic peptide chain release factor GTP-binding subunit ERF3A			GRMZM2G087513
MQTL2.07	GRMZM2G028313	Zm00001d004173	Zm00001eb086880	103646667	eukaryotic peptide chain release factor GTP-binding subunit ERF3A			GRMZM2G087531
MQTL2.07	GRMZM2G028730	Zm00001d004176	Zm00001eb086910	100276147	uncharacterized LOC100276147			GRMZM2G087590
MQTL2.07	GRMZM2G038916							GRMZM2G088096
MQTL2.07	GRMZM2G052268	Zm00001d004165	Zm00001eb086820	100285859	F-box domain containing protein			GRMZM2G088358
MQTL2.07	GRMZM2G053690							GRMZM2G088601
MQTL2.07	GRMZM2G057136	Zm00001d004197	Zm00001eb087040					GRMZM2G088653
MQTL2.07	GRMZM2G060444	Zm00001d004234	Zm00001eb087250					GRMZM2G088727
MQTL2.07	GRMZM2G068707		Zm00001eb087010					GRMZM2G088737
MQTL2.07	GRMZM2G077863	Zm00001d004270	Zm00001eb087500					GRMZM2G088753
MQTL2.07	GRMZM2G083935	Zm00001d004248	Zm00001eb087380	100382222	uncharacterized protein LOC100382222			GRMZM2G088778
MQTL2.07	GRMZM2G091313	Zm00001d004242	Zm00001eb087340					GRMZM2G089147
MQTL2.07	GRMZM2G093320		Zm00001eb087280					GRMZM2G089361
MQTL2.07	GRMZM2G096281							GRMZM2G089425
MQTL2.07	GRMZM2G099580		Zm00001eb087450					GRMZM2G089448
MQTL2.07	GRMZM2G100295							GRMZM2G089556
MQTL2.07	GRMZM2G100336							GRMZM2G089618
MQTL2.07	GRMZM2G101250	Zm00001d004259	Zm00001eb087460					GRMZM2G089673
MQTL2.07	GRMZM2G101250	Zm00001d004260	Zm00001eb087460					GRMZM2G089696
MQTL2.07	GRMZM2G101250	Zm00001d004259	Zm00001eb087470					GRMZM2G089743
MQTL2.07	GRMZM2G101250	Zm00001d004260	Zm00001eb087470					GRMZM2G089873
MQTL2.07	GRMZM2G112210	Zm00001d004220	Zm00001eb087160	100283263	uncharacterized protein LOC100283263			GRMZM2G089949
MQTL2.07	GRMZM2G115805	Zm00001d004196	Zm00001eb087020	100273106	uncharacterized protein LOC100273106			GRMZM2G089959
MQTL2.07	GRMZM2G127457		Zm00001eb086930					GRMZM2G089982
MQTL2.07	GRMZM2G145370	Zm00001d004222						GRMZM2G090010
MQTL2.07	GRMZM2G148751	Zm00001d004200	Zm00001eb087060	100283688	actin associated protein			GRMZM2G090018
MQTL2.07	GRMZM2G154558	Zm00001d004187	Zm00001eb086960	103646676	UDP-glycosyltransferase 92A1			GRMZM2G090374
MQTL2.07	GRMZM2G154685	Zm00001d004243	Zm00001eb087350	103646716	70 kDa peptidyl-prolyl isomerase			GRMZM2G090432
MQTL2.07	GRMZM2G159678	Zm00001d004193	Zm00001eb086990	100280606	receptor protein kinase-like protein			GRMZM2G090500
MQTL2.07	GRMZM2G170586		Zm00001eb087400	100191805				GRMZM2G090573
MQTL2.07	GRMZM2G173738	Zm00001d004209	Zm00001eb087100					GRMZM2G090595
MQTL2.07	GRMZM2G174248							GRMZM2G090693
MQTL2.07	GRMZM2G176274	Zm00001d004190	Zm00001eb086980	100191286	uncharacterized protein LOC100191286			GRMZM2G090723
MQTL2.07	GRMZM2G177721							GRMZM2G090736
MQTL2.07	GRMZM2G177755							GRMZM2G090904
MQTL2.07	GRMZM2G178486	Zm00001d004208	Zm00001eb087090					GRMZM2G091155
MQTL2.07	GRMZM2G326177	Zm00001d004246						GRMZM2G091243
MQTL2.07	GRMZM2G339836		Zm00001eb086940					GRMZM2G091478
MQTL2.07	GRMZM2G352281	Zm00001d004238	Zm00001eb087310					GRMZM2G091487
MQTL2.07	GRMZM2G353548	Zm00001d004215	Zm00001eb087120					GRMZM2G091503
MQTL2.07	GRMZM2G353548	Zm00001d004215	Zm00001eb087130					GRMZM2G091527
MQTL2.07	GRMZM2G392672							GRMZM2G091535
MQTL2.07	GRMZM2G393180		Zm00001eb087280					GRMZM2G091595
MQTL2.07	GRMZM2G399602							GRMZM2G091717
MQTL2.07	GRMZM2G399604							GRMZM2G091995
MQTL2.07	GRMZM2G400925							GRMZM2G092024
MQTL2.07	GRMZM2G421160	Zm00001d004250	Zm00001eb087410					GRMZM2G092107
MQTL2.07	GRMZM2G438243	Zm00001d004231	Zm00001eb087230	100277095	uncharacterized protein LOC100277095 precursor			GRMZM2G092128
MQTL2.07	GRMZM2G438243	Zm00001d004232	Zm00001eb087230	100277095	uncharacterized protein LOC100277095 precursor			GRMZM2G092190
MQTL2.07	GRMZM2G438260	Zm00001d004230	Zm00001eb087200					GRMZM2G092256
MQTL2.07	GRMZM2G438260	Zm00001d004230	Zm00001eb087210					GRMZM2G092451
MQTL2.07	GRMZM2G438260	Zm00001d004230	Zm00001eb087220					GRMZM2G092535
MQTL2.07	GRMZM2G441937							GRMZM2G092581
MQTL2.07	GRMZM2G450273	Zm00001d004203	Zm00001eb087080	100281643	flowering promoting factor-like 1			GRMZM2G092590
MQTL2.07	GRMZM2G492768							GRMZM2G092749
MQTL2.07	GRMZM2G498547							GRMZM2G092835
MQTL2.07	GRMZM2G567619							GRMZM2G092959
MQTL2.07	GRMZM2G583556	Zm00001d004168	Zm00001eb086850					GRMZM2G092981
MQTL2.07	GRMZM2G703099							GRMZM2G092988
MQTL2.07	GRMZM2G703104							GRMZM2G093020
MQTL2.07	GRMZM5G803503							GRMZM2G093076
MQTL2.07	GRMZM5G806387	Zm00001d004198	Zm00001eb087050	100192537	CASP-like protein 2A1			GRMZM2G093320
MQTL2.07	GRMZM5G811592							GRMZM2G093554
MQTL2.07	GRMZM5G844124							GRMZM2G093580
MQTL2.07	GRMZM5G869030							GRMZM2G093598
MQTL2.07	GRMZM5G871600							GRMZM2G093606
MQTL2.07	GRMZM5G895419							GRMZM2G093622
MQTL2.07	GRMZM5G895549							GRMZM2G093826
MQTL2.08	AC190811.1_FG003							GRMZM2G093900
MQTL2.08	AC194163.3_FG001	Zm00001d004835	Zm00001eb091820					GRMZM2G093987
MQTL2.08	AC194163.3_FG002							GRMZM2G093999
MQTL2.08	AC194163.3_FG003							GRMZM2G094072
MQTL2.08	AC198223.3_FG001		Zm00001eb091550					GRMZM2G094081
MQTL2.08	AC200112.4_FG007	Zm00001d004884	Zm00001eb092440					GRMZM2G094100
MQTL2.08	AC200112.4_FG008		Zm00001eb092430					GRMZM2G094189
MQTL2.08	AC203257.2_FG003	Zm00001d004797	Zm00001eb092370					GRMZM2G094352
MQTL2.08	AC203257.2_FG003	Zm00001d004798	Zm00001eb092370					GRMZM2G094353
MQTL2.08	AC204953.3_FG002							GRMZM2G094497
MQTL2.08	AC205251.3_FG002	Zm00001d004888	Zm00001eb092470					GRMZM2G094526
MQTL2.08	AC205544.3_FG004							GRMZM2G094655
MQTL2.08	AC206611.3_FG002	Zm00001d004938	Zm00001eb092910					GRMZM2G094699
MQTL2.08	AC206611.3_FG002	Zm00001d004939	Zm00001eb092920					GRMZM2G094705
MQTL2.08	AC206611.3_FG002	Zm00001d004939	Zm00001eb092920					GRMZM2G094768
MQTL2.08	AC206611.3_FG003	Zm00001d004938	Zm00001eb092920					GRMZM2G094781
MQTL2.08	AC206611.3_FG003	Zm00001d004938	Zm00001eb092920					GRMZM2G094808
MQTL2.08	AC206611.3_FG003	Zm00001d004939						GRMZM2G095039
MQTL2.08	AC207206.3_FG001							GRMZM2G095185
MQTL2.08	AC207206.3_FG003							GRMZM2G095206
MQTL2.08	AC216705.3_FG002	Zm00001d004735						GRMZM2G095331
MQTL2.08	AC219084.3_FG001							GRMZM2G095411
MQTL2.08	AC226536.2_FG001							GRMZM2G095552
MQTL2.08	GRMZM2G000959	Zm00001d004763	Zm00001eb091430	103647003	probable glucan endo-1,3-beta-glucosidase A6			GRMZM2G095631
MQTL2.08	GRMZM2G001524	Zm00001d004713	Zm00001eb091050					GRMZM2G095643
MQTL2.08	GRMZM2G002824							GRMZM2G095663
MQTL2.08	GRMZM2G003234	Zm00001d004822	Zm00001eb091800					GRMZM2G095865
MQTL2.08	GRMZM2G003755	Zm00001d004772	Zm00001eb091500	100383650	uncharacterized protein LOC100383650			GRMZM2G096008
MQTL2.08	GRMZM2G006765	Zm00001d004855	Zm00001eb092060					GRMZM2G096165
MQTL2.08	GRMZM2G006985	Zm00001d004805	Zm00001eb091650					GRMZM2G096231
MQTL2.08	GRMZM2G007097							GRMZM2G096234
MQTL2.08	GRMZM2G010282	Zm00001d004855	Zm00001eb092070	100304239	uncharacterized protein LOC100304239			GRMZM2G096261
MQTL2.08	GRMZM2G010282	Zm00001d004855	Zm00001eb092070	100304239	uncharacterized protein LOC100304239			GRMZM2G096370
MQTL2.08	GRMZM2G013767	Zm00001d004877	Zm00001eb092260					GRMZM2G096525
MQTL2.08	GRMZM2G014150	Zm00001d004887	Zm00001eb092460					GRMZM2G096548
MQTL2.08	GRMZM2G020183	Zm00001d004725	Zm00001eb091140	103646975	putative glycine-rich cell wall structural protein 1			GRMZM2G096705
MQTL2.08	GRMZM2G020704	Zm00001d004726						GRMZM2G097030
MQTL2.08	GRMZM2G024495	Zm00001d004909	Zm00001eb092650	100272575	uncharacterized protein LOC100272575 precursor			GRMZM2G097103
MQTL2.08	GRMZM2G025205	Zm00001d004728	Zm00001eb091170	103646979	putative glycine-rich cell wall structural protein 1			GRMZM2G097141
MQTL2.08	GRMZM2G025264	Zm00001d004727	Zm00001eb091160					GRMZM2G097395
MQTL2.08	GRMZM2G026556	Zm00001d004966	Zm00001eb093200					GRMZM2G097509
MQTL2.08	GRMZM2G027638							GRMZM2G097533
MQTL2.08	GRMZM2G028179	Zm00001d004899	Zm00001eb092600	100304408	uncharacterized protein LOC100304408			GRMZM2G097683
MQTL2.08	GRMZM2G028183	Zm00001d004898	Zm00001eb092590	100217233	uncharacterized protein LOC100217233			GRMZM2G097704
MQTL2.08	GRMZM2G029079	Zm00001d004840	Zm00001eb091890					GRMZM2G097746
MQTL2.08	GRMZM2G032478	Zm00001d004881	Zm00001eb092280	103647057	transcription repressor OFP8			GRMZM2G097851
MQTL2.08	GRMZM2G035599							GRMZM2G097880
MQTL2.08	GRMZM2G039359							GRMZM2G097884
MQTL2.08	GRMZM2G039648							GRMZM2G097934
MQTL2.08	GRMZM2G042897	Zm00001d004913	Zm00001eb092690	103647081	uncharacterized protein LOC103647081			GRMZM2G097995
MQTL2.08	GRMZM2G043226	Zm00001d004814	Zm00001eb091720	103647022	integrator complex subunit 3			GRMZM2G098099
MQTL2.08	GRMZM2G044493	Zm00001d004908	Zm00001eb092640	100278201	uncharacterized protein LOC100278201			GRMZM2G098577
MQTL2.08	GRMZM2G045452	Zm00001d004953						GRMZM2G098815
MQTL2.08	GRMZM2G046201	Zm00001d004929	Zm00001eb092850	103647090	uncharacterized protein LOC103647090 precursor			GRMZM2G098819
MQTL2.08	GRMZM2G046498	Zm00001d004716	Zm00001eb091060	103646963	probable NAD kinase 2, chloroplastic isoform X1			GRMZM2G098884
MQTL2.08	GRMZM2G047292							GRMZM2G098912
MQTL2.08	GRMZM2G047486	Zm00001d004812	Zm00001eb091710	606407	calcium-dependent protein kinase ZmCPK11			GRMZM2G098957
MQTL2.08	GRMZM2G051738	Zm00001d004924	Zm00001eb092800					GRMZM2G098988
MQTL2.08	GRMZM2G052193		Zm00001eb091770					GRMZM2G099088
MQTL2.08	GRMZM2G052277	Zm00001d004818	Zm00001eb091750	103647023	CBS domain-containing protein CBSCBSPB3 isoform X2			GRMZM2G099206
MQTL2.08	GRMZM2G052279	Zm00001d004885	Zm00001eb092450					GRMZM2G099449
MQTL2.08	GRMZM2G052323							GRMZM2G099474
MQTL2.08	GRMZM2G053466	Zm00001d004817	Zm00001eb091740					GRMZM2G099491
MQTL2.08	GRMZM2G054987	Zm00001d004755	Zm00001eb091380					GRMZM2G099502
MQTL2.08	GRMZM2G055973	Zm00001d004917	Zm00001eb092730	100274339	putative RING zinc finger domain superfamily protein			GRMZM2G099577
MQTL2.08	GRMZM2G057065	Zm00001d004862	Zm00001eb092120	103647039				GRMZM2G099604
MQTL2.08	GRMZM2G057078	Zm00001d004861	Zm00001eb092100					GRMZM2G099615
MQTL2.08	GRMZM2G057078	Zm00001d004861	Zm00001eb092110					GRMZM2G099630
MQTL2.08	GRMZM2G065692	Zm00001d004771	Zm00001eb091490					GRMZM2G099642
MQTL2.08	GRMZM2G066213	Zm00001d004848	Zm00001eb091980	103647034	uncharacterized protein LOC103647034			GRMZM2G099758
MQTL2.08	GRMZM2G066700	Zm00001d004748						GRMZM2G099810
MQTL2.08	GRMZM2G067553							GRMZM2G099978
MQTL2.08	GRMZM2G069028	Zm00001d004889	Zm00001eb092480	542051	WUSCHEL-related homeobox 3A			GRMZM2G100103
MQTL2.08	GRMZM2G074306	Zm00001d004876	Zm00001eb092240	100273836	uncharacterized protein LOC100273836			GRMZM2G100313
MQTL2.08	GRMZM2G076356	Zm00001d004942	Zm00001eb092950					GRMZM2G100328
MQTL2.08	GRMZM2G076356	Zm00001d004942	Zm00001eb092960					GRMZM2G100336
MQTL2.08	GRMZM2G076415	Zm00001d004959	Zm00001eb093150	100282581	myosin-like protein			GRMZM2G100360
MQTL2.08	GRMZM2G086346	Zm00001d004944	Zm00001eb092970					GRMZM2G100457
MQTL2.08	GRMZM2G087105	Zm00001d004739	Zm00001eb091260	100193224	uncharacterized protein LOC100193224			GRMZM2G100583
MQTL2.08	GRMZM2G087212	Zm00001d004740	Zm00001eb091270	100192672	transmembrane 9 superfamily protein member 3 precursor			GRMZM2G100732
MQTL2.08	GRMZM2G087222							GRMZM2G101004
MQTL2.08	GRMZM2G088778	Zm00001d004738	Zm00001eb091250					GRMZM2G101069
MQTL2.08	GRMZM2G089238	Zm00001d004796	Zm00001eb092400					GRMZM2G101221
MQTL2.08	GRMZM2G092581	Zm00001d004931	Zm00001eb092880	103647091	neurogenic protein mastermind-like			GRMZM2G101250
MQTL2.08	GRMZM2G094699	Zm00001d004807	Zm00001eb091670	100384159	uncharacterized protein LOC100384159			GRMZM2G101287
MQTL2.08	GRMZM2G097084		Zm00001eb091460					GRMZM2G101333
MQTL2.08	GRMZM2G099502	Zm00001d004847	Zm00001eb091960					GRMZM2G101350
MQTL2.08	GRMZM2G104307	Zm00001d004973	Zm00001eb093230					GRMZM2G101383
MQTL2.08	GRMZM2G109527	Zm00001d004762	Zm00001eb091420					GRMZM2G101393
MQTL2.08	GRMZM2G109547	Zm00001d004762	Zm00001eb091420					GRMZM2G101408
MQTL2.08	GRMZM2G110409		Zm00001eb092310	103647063	E3 ubiquitin-protein ligase RZF1			GRMZM2G101511
MQTL2.08	GRMZM2G110409		Zm00001eb092340	103647063	E3 ubiquitin-protein ligase RZF1			GRMZM2G101576
MQTL2.08	GRMZM2G111143	Zm00001d004768	Zm00001eb091470	100273476	uncharacterized protein LOC100273476 precursor			GRMZM2G102059
MQTL2.08	GRMZM2G111622	Zm00001d004794	Zm00001eb092410					GRMZM2G102156
MQTL2.08	GRMZM2G113033	Zm00001d004894	Zm00001eb092540					GRMZM2G102189
MQTL2.08	GRMZM2G115451	Zm00001d004804	Zm00001eb091640					GRMZM2G102322
MQTL2.08	GRMZM2G116812	Zm00001d004916	Zm00001eb092720	100383227	uncharacterized protein LOC100383227			GRMZM2G102356
MQTL2.08	GRMZM2G117361	Zm00001d004769	Zm00001eb091480					GRMZM2G102447
MQTL2.08	GRMZM2G117858	Zm00001d004717						GRMZM2G102639
MQTL2.08	GRMZM2G118759	Zm00001d004730	Zm00001eb091190	101027139	glycine-rich cell wall structural protein 2 precursor			GRMZM2G102720
MQTL2.08	GRMZM2G118800	Zm00001d004731	Zm00001eb091200	100382449	uncharacterized protein LOC100382449			GRMZM2G102858
MQTL2.08	GRMZM2G119105	Zm00001d004926	Zm00001eb092830	103647088	calcium/calmodulin-dependent serine/threonine-protein kinase 1			GRMZM2G102862
MQTL2.08	GRMZM2G119117	Zm00001d004927	Zm00001eb092840	107305673	uncharacterized protein LOC107305673			GRMZM2G103050
MQTL2.08	GRMZM2G122038	Zm00001d004877	Zm00001eb092260					GRMZM2G103070
MQTL2.08	GRMZM2G124715	Zm00001d004744	Zm00001eb091300					GRMZM2G103166
MQTL2.08	GRMZM2G125352	Zm00001d004856	Zm00001eb092080	100193032	uncharacterized protein LOC100193032			GRMZM2G103182
MQTL2.08	GRMZM2G127418	Zm00001d004921	Zm00001eb092770	100281319	uncharacterized protein LOC100281319			GRMZM2G103186
MQTL2.08	GRMZM2G128268	Zm00001d004734	Zm00001eb091230	542088	aspartic proteinase Asp1 precursor			GRMZM2G103245
MQTL2.08	GRMZM2G130131	Zm00001d004882	Zm00001eb092300	103647058	transcription repressor OFP13			GRMZM2G103357
MQTL2.08	GRMZM2G130486							GRMZM2G103864
MQTL2.08	GRMZM2G132000	Zm00001d004936						GRMZM2G103909
MQTL2.08	GRMZM2G132522	Zm00001d004756						GRMZM2G103937
MQTL2.08	GRMZM2G132522	Zm00001d004757						GRMZM2G104074
MQTL2.08	GRMZM2G132966							GRMZM2G104092
MQTL2.08	GRMZM2G132968	Zm00001d004841	Zm00001eb091900	101027258	60S ribosomal protein L3			GRMZM2G104220
MQTL2.08	GRMZM2G132968	Zm00001d004841	Zm00001eb091900	103646454	60S ribosomal protein L3			GRMZM2G104254
MQTL2.08	GRMZM2G132968	Zm00001d004841	Zm00001eb091900	103647029	60S ribosomal protein L3			GRMZM2G104307
MQTL2.08	GRMZM2G132968	Zm00001d004841	Zm00001eb091900	103647030	60S ribosomal protein L3			GRMZM2G104325
MQTL2.08	GRMZM2G133624	Zm00001d004930	Zm00001eb092870	100193080	uncharacterized protein LOC100193080			GRMZM2G104390
MQTL2.08	GRMZM2G133669	Zm00001d004811						GRMZM2G104481
MQTL2.08	GRMZM2G133716	Zm00001d004810	Zm00001eb091700	100381618	uncharacterized protein LOC100381618			GRMZM2G104505
MQTL2.08	GRMZM2G135446	Zm00001d004875	Zm00001eb092230	100272683	uncharacterized protein LOC100272683			GRMZM2G104639
MQTL2.08	GRMZM2G135990	Zm00001d004903	Zm00001eb092610					GRMZM2G104722
MQTL2.08	GRMZM2G135990	Zm00001d004903	Zm00001eb092620					GRMZM2G104789
MQTL2.08	GRMZM2G136039	Zm00001d004905	Zm00001eb092630					GRMZM2G104843
MQTL2.08	GRMZM2G136039	Zm00001d004906	Zm00001eb092630					GRMZM2G104907
MQTL2.08	GRMZM2G136308							GRMZM2G104942
MQTL2.08	GRMZM2G136328							GRMZM2G105004
MQTL2.08	GRMZM2G143397	Zm00001d004721	Zm00001eb091110					GRMZM2G105065
MQTL2.08	GRMZM2G143403		Zm00001eb091100					GRMZM2G105085
MQTL2.08	GRMZM2G144662	Zm00001d004891	Zm00001eb092510					GRMZM2G105542
MQTL2.08	GRMZM2G144662	Zm00001d004892	Zm00001eb092510					GRMZM2G105617
MQTL2.08	GRMZM2G144662	Zm00001d004891	Zm00001eb092520					GRMZM2G105766
MQTL2.08	GRMZM2G144662	Zm00001d004892	Zm00001eb092520					GRMZM2G105901
MQTL2.08	GRMZM2G144885	Zm00001d004852						GRMZM2G105940
MQTL2.08	GRMZM2G144948							GRMZM2G105987
MQTL2.08	GRMZM2G145651	Zm00001d004933	Zm00001eb092890	100501632	uncharacterized protein LOC100501632 precursor			GRMZM2G106039
MQTL2.08	GRMZM2G145666	Zm00001d004934	Zm00001eb092900					GRMZM2G106136
MQTL2.08	GRMZM2G146472	Zm00001d004837	Zm00001eb091850	100280198	uncharacterized protein LOC100280198			GRMZM2G106164
MQTL2.08	GRMZM2G159503	Zm00001d004754	Zm00001eb091370	103646994	dirigent protein 22			GRMZM2G106177
MQTL2.08	GRMZM2G162286	Zm00001d004784	Zm00001eb091560					GRMZM2G106185
MQTL2.08	GRMZM2G162697	Zm00001d004956	Zm00001eb093120	100381436	uncharacterized protein LOC100381436			GRMZM2G106216
MQTL2.08	GRMZM2G162737	Zm00001d004957	Zm00001eb093140					GRMZM2G106673
MQTL2.08	GRMZM2G164064	Zm00001d004729	Zm00001eb091180	103646981	putative glycine-rich cell wall structural protein 1 precursor			GRMZM2G106766
MQTL2.08	GRMZM2G164647	Zm00001d004787						GRMZM2G106810
MQTL2.08	GRMZM2G165170							GRMZM2G106834
MQTL2.08	GRMZM2G166622	Zm00001d004915	Zm00001eb092710					GRMZM2G106881
MQTL2.08	GRMZM2G168829		Zm00001eb092550					GRMZM2G106921
MQTL2.08	GRMZM2G169688	Zm00001d004790	Zm00001eb091620	103647016	transcription factor GTE8			GRMZM2G107003
MQTL2.08	GRMZM2G170452	Zm00001d004782	Zm00001eb091540	100280640	nucleotide binding protein			GRMZM2G107027
MQTL2.08	GRMZM2G174160							GRMZM2G107076
MQTL2.08	GRMZM2G174919	Zm00001d004779	Zm00001eb091530	100272317	cleavage stimulating factor 64-like			GRMZM2G107114
MQTL2.08	GRMZM2G177005	Zm00001d004821	Zm00001eb091780	100280656	V-type proton ATPase 16 kDa proteolipid subunit			GRMZM2G107199
MQTL2.08	GRMZM2G177005	Zm00001d004821	Zm00001eb091780	100282817	vacuolar ATP synthase 16 kDa proteolipid subunit			GRMZM2G107299
MQTL2.08	GRMZM2G178199	Zm00001d004758	Zm00001eb091400	100274585	disease resistance response protein 206 precursor			GRMZM2G107306
MQTL2.08	GRMZM2G307553							GRMZM2G107402
MQTL2.08	GRMZM2G315394	Zm00001d004788	Zm00001eb091590					GRMZM2G107406
MQTL2.08	GRMZM2G315394	Zm00001d004788	Zm00001eb091600					GRMZM2G107444
MQTL2.08	GRMZM2G315394	Zm00001d004788	Zm00001eb091610					GRMZM2G107521
MQTL2.08	GRMZM2G316322							GRMZM2G107588
MQTL2.08	GRMZM2G322874	Zm00001d004793						GRMZM2G107595
MQTL2.08	GRMZM2G324314	Zm00001d004839	Zm00001eb091870	101027258	60S ribosomal protein L3			GRMZM2G107715
MQTL2.08	GRMZM2G324314	Zm00001d004839	Zm00001eb091870	103646454	60S ribosomal protein L3			GRMZM2G107759
MQTL2.08	GRMZM2G324314	Zm00001d004839	Zm00001eb091870	103647029	60S ribosomal protein L3			GRMZM2G107844
MQTL2.08	GRMZM2G324314	Zm00001d004839	Zm00001eb091870	103647030	60S ribosomal protein L3			GRMZM2G108087
MQTL2.08	GRMZM2G328473							GRMZM2G108200
MQTL2.08	GRMZM2G335126	Zm00001d004737	Zm00001eb091240					GRMZM2G108225
MQTL2.08	GRMZM2G344857	Zm00001d004955	Zm00001eb093110					GRMZM2G108355
MQTL2.08	GRMZM2G346037	Zm00001d004951	Zm00001eb093040					GRMZM2G108643
MQTL2.08	GRMZM2G346037	Zm00001d004951	Zm00001eb093050					GRMZM2G108677
MQTL2.08	GRMZM2G346037	Zm00001d004951	Zm00001eb093060					GRMZM2G108694
MQTL2.08	GRMZM2G346037	Zm00001d004951	Zm00001eb093070					GRMZM2G108716
MQTL2.08	GRMZM2G348151	Zm00001d004846	Zm00001eb091940					GRMZM2G108741
MQTL2.08	GRMZM2G348509							GRMZM2G108775
MQTL2.08	GRMZM2G348855	Zm00001d004895						GRMZM2G108829
MQTL2.08	GRMZM2G348866	Zm00001d004896	Zm00001eb092570	100279265	Dcp1-like decapping family			GRMZM2G108904
MQTL2.08	GRMZM2G352310	Zm00001d004886						GRMZM2G108996
MQTL2.08	GRMZM2G352947	Zm00001d004819						GRMZM2G109039
MQTL2.08	GRMZM2G355679	Zm00001d004869	Zm00001eb092190					GRMZM2G109229
MQTL2.08	GRMZM2G355679	Zm00001d004870	Zm00001eb092190					GRMZM2G109348
MQTL2.08	GRMZM2G355679	Zm00001d004869	Zm00001eb092200					GRMZM2G109388
MQTL2.08	GRMZM2G355679	Zm00001d004870	Zm00001eb092200					GRMZM2G109496
MQTL2.08	GRMZM2G356178	Zm00001d004918	Zm00001eb092750					GRMZM2G109527
MQTL2.08	GRMZM2G356178	Zm00001d004919	Zm00001eb092750					GRMZM2G109547
MQTL2.08	GRMZM2G366802							GRMZM2G109582
MQTL2.08	GRMZM2G373322	Zm00001d004836	Zm00001eb091830					GRMZM2G109677
MQTL2.08	GRMZM2G373322	Zm00001d004836	Zm00001eb091840					GRMZM2G109805
MQTL2.08	GRMZM2G391673		Zm00001eb093180					GRMZM2G109848
MQTL2.08	GRMZM2G391684		Zm00001eb093170					GRMZM2G109865
MQTL2.08	GRMZM2G403562	Zm00001d004925	Zm00001eb092810					GRMZM2G109869
MQTL2.08	GRMZM2G414563	Zm00001d004773						GRMZM2G109914
MQTL2.08	GRMZM2G416491	Zm00001d004751	Zm00001eb091350					GRMZM2G110027
MQTL2.08	GRMZM2G416524	Zm00001d004791	Zm00001eb091630					GRMZM2G110067
MQTL2.08	GRMZM2G424659	Zm00001d004743	Zm00001eb091280					GRMZM2G110076
MQTL2.08	GRMZM2G424659	Zm00001d004743	Zm00001eb091290					GRMZM2G110201
MQTL2.08	GRMZM2G430601	Zm00001d004938	Zm00001eb092910					GRMZM2G110279
MQTL2.08	GRMZM2G430601	Zm00001d004939						GRMZM2G110286
MQTL2.08	GRMZM2G430607	Zm00001d004940						GRMZM2G110332
MQTL2.08	GRMZM2G430607	Zm00001d004941						GRMZM2G110541
MQTL2.08	GRMZM2G436688	Zm00001d004874	Zm00001eb092220	103647049	pectinesterase inhibitor 10			GRMZM2G110579
MQTL2.08	GRMZM2G441254							GRMZM2G110582
MQTL2.08	GRMZM2G443740	Zm00001d004720	Zm00001eb091090	103646971	probable methyltransferase PMT26			GRMZM2G110742
MQTL2.08	GRMZM2G450044	Zm00001d004910	Zm00001eb092660					GRMZM2G111014
MQTL2.08	GRMZM2G450044	Zm00001d004910	Zm00001eb092670					GRMZM2G111117
MQTL2.08	GRMZM2G452727							GRMZM2G111143
MQTL2.08	GRMZM2G458035	Zm00001d004865	Zm00001eb092140					GRMZM2G111146
MQTL2.08	GRMZM2G458035	Zm00001d004866	Zm00001eb092140					GRMZM2G111208
MQTL2.08	GRMZM2G460465	Zm00001d004867	Zm00001eb092170	103647043	uncharacterized protein LOC103647043			GRMZM2G111228
MQTL2.08	GRMZM2G460465	Zm00001d004867	Zm00001eb092160					GRMZM2G111261
MQTL2.08	GRMZM2G460472	Zm00001d004868	Zm00001eb092180					GRMZM2G111300
MQTL2.08	GRMZM2G462641							GRMZM2G111423
MQTL2.08	GRMZM2G464963	Zm00001d004786						GRMZM2G111462
MQTL2.08	GRMZM2G469969	Zm00001d004956	Zm00001eb093130					GRMZM2G111477
MQTL2.08	GRMZM2G469969	Zm00001d004956	Zm00001eb093130					GRMZM2G111482
MQTL2.08	GRMZM2G472770	Zm00001d004785	Zm00001eb091570					GRMZM2G111537
MQTL2.08	GRMZM2G472770	Zm00001d004785	Zm00001eb091580					GRMZM2G111731
MQTL2.08	GRMZM2G473891							GRMZM2G111770
MQTL2.08	GRMZM2G473915							GRMZM2G111964
MQTL2.08	GRMZM2G473925	Zm00001d004775	Zm00001eb091510					GRMZM2G112210
MQTL2.08	GRMZM2G477681							GRMZM2G112244
MQTL2.08	GRMZM2G481210	Zm00001d004890	Zm00001eb092490					GRMZM2G112247
MQTL2.08	GRMZM2G481210	Zm00001d004890	Zm00001eb092500					GRMZM2G112278
MQTL2.08	GRMZM2G482935							GRMZM2G112309
MQTL2.08	GRMZM2G486618							GRMZM2G112352
MQTL2.08	GRMZM2G498079							GRMZM2G112429
MQTL2.08	GRMZM2G498111							GRMZM2G112548
MQTL2.08	GRMZM2G522398	Zm00001d004850	Zm00001eb092000					GRMZM2G112623
MQTL2.08	GRMZM2G522398	Zm00001d004850	Zm00001eb092010					GRMZM2G112626
MQTL2.08	GRMZM2G522398	Zm00001d004850	Zm00001eb092020					GRMZM2G112805
MQTL2.08	GRMZM2G522398	Zm00001d004850	Zm00001eb092030					GRMZM2G112830
MQTL2.08	GRMZM2G534113							GRMZM2G112895
MQTL2.08	GRMZM2G537291	Zm00001d004960	Zm00001eb093160					GRMZM2G112914
MQTL2.08	GRMZM2G565940							GRMZM2G112951
MQTL2.08	GRMZM2G568427							GRMZM2G113033
MQTL2.08	GRMZM2G588344	Zm00001d004826						GRMZM2G113181
MQTL2.08	GRMZM2G588350							GRMZM2G113235
MQTL2.08	GRMZM2G703173							GRMZM2G113252
MQTL2.08	GRMZM2G703183							GRMZM2G113815
MQTL2.08	GRMZM2G703185							GRMZM2G113995
MQTL2.08	GRMZM2G703187							GRMZM2G114081
MQTL2.08	GRMZM2G703190							GRMZM2G114113
MQTL2.08	GRMZM2G703193	Zm00001d004943						GRMZM2G114131
MQTL2.08	GRMZM5G815214	Zm00001d004945	Zm00001eb092980	100278647	uncharacterized protein LOC100278647 precursor			GRMZM2G114186
MQTL2.08	GRMZM5G815214	Zm00001d004945	Zm00001eb092980	100285608	36.4 kDa proline-rich protein precursor			GRMZM2G114192
MQTL2.08	GRMZM5G821024	Zm00001d004857	Zm00001eb092090	100285024	transcription factor RF2b			GRMZM2G114220
MQTL2.08	GRMZM5G825076	Zm00001d004759						GRMZM2G114276
MQTL2.08	GRMZM5G854138	Zm00001d004843	Zm00001eb091920	100281622	uncharacterized protein LOC100281622			GRMZM2G114557
MQTL2.08	GRMZM5G854264	Zm00001d004718	Zm00001eb091080					GRMZM2G114634
MQTL2.08	GRMZM5G854264	Zm00001d004719	Zm00001eb091080					GRMZM2G114672
MQTL2.08	GRMZM5G869027	Zm00001d004949						GRMZM2G114702
MQTL2.08	GRMZM5G874896	Zm00001d004733	Zm00001eb091210					GRMZM2G114756
MQTL2.08	GRMZM5G879417							GRMZM2G114788
MQTL2.08	GRMZM5G879432							GRMZM2G114952
MQTL2.08	GRMZM5G881824							GRMZM2G114988
MQTL2.08	GRMZM5G898141	Zm00001d004851	Zm00001eb092040	100276786	uncharacterized protein LOC100276786			GRMZM2G115451
MQTL3.01	AC182439.4_FG004	Zm00001d040493	Zm00001eb129210					GRMZM2G115518
MQTL3.01	AC190701.3_FG001							GRMZM2G115579
MQTL3.01	AC191551.3_FG003	Zm00001d040497	Zm00001eb129220	103650038	bisdemethoxycurcumin synthase			GRMZM2G115612
MQTL3.01	AC191551.3_FG003	Zm00001d040497	Zm00001eb129240	103650038	bisdemethoxycurcumin synthase			GRMZM2G115621
MQTL3.01	AC193464.3_FG001							GRMZM2G115698
MQTL3.01	AC197373.4_FG005							GRMZM2G115701
MQTL3.01	AC199638.4_FG001							GRMZM2G115805
MQTL3.01	AC202139.3_FG008	Zm00001d040386	Zm00001eb128520					GRMZM2G116133
MQTL3.01	AC203804.4_FG008							GRMZM2G116137
MQTL3.01	AC207652.3_FG001	Zm00001d040320	Zm00001eb128010					GRMZM2G116140
MQTL3.01	AC211403.4_FG005	Zm00001d040506	Zm00001eb129350					GRMZM2G116167
MQTL3.01	AC213600.3_FG002	Zm00001d040448	Zm00001eb128910	100279534	uncharacterized protein LOC100279534 precursor			GRMZM2G116190
MQTL3.01	AC213600.3_FG002	Zm00001d040449	Zm00001eb128910	100279534	uncharacterized protein LOC100279534 precursor			GRMZM2G116243
MQTL3.01	AC213600.3_FG004							GRMZM2G116434
MQTL3.01	GRMZM2G001451	Zm00001d040526	Zm00001eb129480					GRMZM2G116563
MQTL3.01	GRMZM2G002830	Zm00001d040390	Zm00001eb128530	100283079	ubiquitin-conjugating enzyme X			GRMZM2G116574
MQTL3.01	GRMZM2G002830	Zm00001d040390	Zm00001eb128550					GRMZM2G116812
MQTL3.01	GRMZM2G002830	Zm00001d040390	Zm00001eb128560					GRMZM2G117060
MQTL3.01	GRMZM2G003883	Zm00001d040446	Zm00001eb128890	542177	PK protein			GRMZM2G117164
MQTL3.01	GRMZM2G005835							GRMZM2G117222
MQTL3.01	GRMZM2G010384		Zm00001eb129470					GRMZM2G117238
MQTL3.01	GRMZM2G011101	Zm00001d040503	Zm00001eb129320	100384840	uncharacterized protein LOC100384840			GRMZM2G117360
MQTL3.01	GRMZM2G013378	Zm00001d040393	Zm00001eb128590	103650001	BSD domain-containing protein 1			GRMZM2G117361
MQTL3.01	GRMZM2G013971							GRMZM2G117444
MQTL3.01	GRMZM2G017520	Zm00001d040527	Zm00001eb129490					GRMZM2G117513
MQTL3.01	GRMZM2G018566	Zm00001d040438	Zm00001eb128830	100191841	uncharacterized protein LOC100191841			GRMZM2G117755
MQTL3.01	GRMZM2G018666							GRMZM2G117776
MQTL3.01	GRMZM2G018782	Zm00001d040506	Zm00001eb129350					GRMZM2G117786
MQTL3.01	GRMZM2G019721	Zm00001d040390	Zm00001eb128540					GRMZM2G117811
MQTL3.01	GRMZM2G019721	Zm00001d040390	Zm00001eb128540					GRMZM2G117822
MQTL3.01	GRMZM2G019721	Zm00001d040390	Zm00001eb128550					GRMZM2G117963
MQTL3.01	GRMZM2G019721	Zm00001d040390	Zm00001eb128560					GRMZM2G118047
MQTL3.01	GRMZM2G019810	Zm00001d040392	Zm00001eb128570	100217013	uncharacterized protein LOC100217013			GRMZM2G118063
MQTL3.01	GRMZM2G019810	Zm00001d040392	Zm00001eb128580					GRMZM2G118099
MQTL3.01	GRMZM2G022088	Zm00001d040360	Zm00001eb128290	100276317	uncharacterized protein LOC100276317			GRMZM2G118104
MQTL3.01	GRMZM2G024733	Zm00001d040340	Zm00001eb128150	100304285	uncharacterized protein LOC100304285			GRMZM2G118303
MQTL3.01	GRMZM2G026182	Zm00001d040374						GRMZM2G118599
MQTL3.01	GRMZM2G026182	Zm00001d040375						GRMZM2G118731
MQTL3.01	GRMZM2G026182	Zm00001d040376						GRMZM2G118759
MQTL3.01	GRMZM2G026182	Zm00001d040377						GRMZM2G118800
MQTL3.01	GRMZM2G028721	Zm00001d040442	Zm00001eb128860	100272410	uncharacterized protein LOC100272410			GRMZM2G118870
MQTL3.01	GRMZM2G029219	Zm00001d040422	Zm00001eb128730					GRMZM2G118884
MQTL3.01	GRMZM2G033626	Zm00001d040334	Zm00001eb128130	100217166	26S proteasome non-ATPase regulatory subunit 14			GRMZM2G118939
MQTL3.01	GRMZM2G033626	Zm00001d040334	Zm00001eb128130	103649975	26S proteasome non-ATPase regulatory subunit 14 homolog			GRMZM2G119105
MQTL3.01	GRMZM2G040069	Zm00001d040389						GRMZM2G119117
MQTL3.01	GRMZM2G042147	Zm00001d040443	Zm00001eb128870					GRMZM2G119246
MQTL3.01	GRMZM2G043109	Zm00001d040463	Zm00001eb129000					GRMZM2G119485
MQTL3.01	GRMZM2G046924	Zm00001d040515	Zm00001eb129380	100217184	Gamma carbonic anhydrase 1 mitochondrial			GRMZM2G119490
MQTL3.01	GRMZM2G048335	Zm00001d040429	Zm00001eb128780					GRMZM2G119546
MQTL3.01	GRMZM2G057305	Zm00001d040383	Zm00001eb128490	100278776	uncharacterized protein LOC100278776			GRMZM2G119693
MQTL3.01	GRMZM2G057352	Zm00001d040382	Zm00001eb128480					GRMZM2G119722
MQTL3.01	GRMZM2G063156	Zm00001d040361	Zm00001eb128300					GRMZM2G119737
MQTL3.01	GRMZM2G064541	Zm00001d040318	Zm00001eb128000	103649967	NAC domain-containing protein 74			GRMZM2G119749
MQTL3.01	GRMZM2G064580	Zm00001d040317	Zm00001eb127990	100382007	putative RING zinc finger domain superfamily protein			GRMZM2G119766
MQTL3.01	GRMZM2G065466							GRMZM2G119778
MQTL3.01	GRMZM2G067511	Zm00001d040323	Zm00001eb128040	542533	calmodulin 2			GRMZM2G119828
MQTL3.01	GRMZM2G067630		Zm00001eb128050					GRMZM2G119886
MQTL3.01	GRMZM2G067630		Zm00001eb128060					GRMZM2G119890
MQTL3.01	GRMZM2G067640							GRMZM2G119921
MQTL3.01	GRMZM2G067642							GRMZM2G119975
MQTL3.01	GRMZM2G067648	Zm00001d040325	Zm00001eb128080					GRMZM2G120035
MQTL3.01	GRMZM2G067648	Zm00001d040326	Zm00001eb128080					GRMZM2G120076
MQTL3.01	GRMZM2G069208	Zm00001d040314	Zm00001eb127970	100274069	uncharacterized protein LOC100274069			GRMZM2G120202
MQTL3.01	GRMZM2G069251	Zm00001d040313	Zm00001eb127960					GRMZM2G120246
MQTL3.01	GRMZM2G078895	Zm00001d040459	Zm00001eb128960	100272826	uncharacterized protein LOC100272826			GRMZM2G120587
MQTL3.01	GRMZM2G079196	Zm00001d040462	Zm00001eb128990	100283498	COP9 signalosome complex subunit 2			GRMZM2G120724
MQTL3.01	GRMZM2G083239	Zm00001d040426	Zm00001eb128760	103650011	transcription factor CSA			GRMZM2G120784
MQTL3.01	GRMZM2G083239	Zm00001d040426	Zm00001eb128750					GRMZM2G120933
MQTL3.01	GRMZM2G085504	Zm00001d040502	Zm00001eb129310	103650042	mavicyanin			GRMZM2G120973
MQTL3.01	GRMZM2G085509	Zm00001d040501	Zm00001eb129300	103650041	ergosterol biosynthetic protein 28			GRMZM2G121143
MQTL3.01	GRMZM2G089743	Zm00001d040429	Zm00001eb128780					GRMZM2G121176
MQTL3.01	GRMZM2G089949	Zm00001d040362	Zm00001eb128310					GRMZM2G121221
MQTL3.01	GRMZM2G089959	Zm00001d040363	Zm00001eb128320	103649988	pentatricopeptide repeat-containing protein At5g57250, mitochondrial			GRMZM2G121460
MQTL3.01	GRMZM2G089982	Zm00001d040364	Zm00001eb128330	100282124	peroxidase 72 precursor			GRMZM2G121812
MQTL3.01	GRMZM2G090374	Zm00001d040513	Zm00001eb129370	103650047	uncharacterized protein LOC103650047			GRMZM2G121928
MQTL3.01	GRMZM2G096100	Zm00001d040519	Zm00001eb129440	100273935	rhicadhesin receptor precursor			GRMZM2G121942
MQTL3.01	GRMZM2G096548	Zm00001d040470	Zm00001eb129080	100280343	uncharacterized protein LOC100280343			GRMZM2G122038
MQTL3.01	GRMZM2G105085	Zm00001d040440	Zm00001eb128840	103650021	mitochondrial import receptor subunit TOM40-1			GRMZM2G122076
MQTL3.01	GRMZM2G111014	Zm00001d040416	Zm00001eb128720	100382343	uncharacterized protein LOC100382343			GRMZM2G122172
MQTL3.01	GRMZM2G111731	Zm00001d040423						GRMZM2G122239
MQTL3.01	GRMZM2G111794							GRMZM2G122277
MQTL3.01	GRMZM2G119737	Zm00001d040373	Zm00001eb128430					GRMZM2G122290
MQTL3.01	GRMZM2G119749	Zm00001d040372	Zm00001eb128420	100191908	uncharacterized protein LOC100191908			GRMZM2G122654
MQTL3.01	GRMZM2G119778	Zm00001d040371	Zm00001eb128410	100191545	uncharacterized protein LOC100191545			GRMZM2G122871
MQTL3.01	GRMZM2G119828	Zm00001d040369	Zm00001eb128380					GRMZM2G122941
MQTL3.01	GRMZM2G119828	Zm00001d040370	Zm00001eb128380					GRMZM2G123063
MQTL3.01	GRMZM2G119828	Zm00001d040369	Zm00001eb128400					GRMZM2G123104
MQTL3.01	GRMZM2G119828	Zm00001d040370	Zm00001eb128400					GRMZM2G123143
MQTL3.01	GRMZM2G121812	Zm00001d040386	Zm00001eb128520					GRMZM2G123305
MQTL3.01	GRMZM2G123407	Zm00001d040504	Zm00001eb129330	103650044	blue copper protein 1b			GRMZM2G123328
MQTL3.01	GRMZM2G128895	Zm00001d040408	Zm00001eb128670	103650005	rab escort protein 1			GRMZM2G123362
MQTL3.01	GRMZM2G130348	Zm00001d040477	Zm00001eb129100					GRMZM2G123371
MQTL3.01	GRMZM2G130348	Zm00001d040477	Zm00001eb129110					GRMZM2G123407
MQTL3.01	GRMZM2G130366	Zm00001d040475	Zm00001eb129090	103650031	pentatricopeptide repeat-containing protein At1g80270, mitochondrial			GRMZM2G123440
MQTL3.01	GRMZM2G131024	Zm00001d040435	Zm00001eb128810	100284410	uncharacterized protein LOC100284410 precursor			GRMZM2G123480
MQTL3.01	GRMZM2G131529	Zm00001d040483	Zm00001eb129160					GRMZM2G123495
MQTL3.01	GRMZM2G132465	Zm00001d040344	Zm00001eb128200	100283567	uncharacterized protein LOC100283567			GRMZM2G123550
MQTL3.01	GRMZM2G132562							GRMZM2G123776
MQTL3.01	GRMZM2G133028	Zm00001d040365	Zm00001eb128340	100275617	uncharacterized protein LOC100275617 precursor			GRMZM2G123796
MQTL3.01	GRMZM2G133028	Zm00001d040366	Zm00001eb128340	100275617	uncharacterized protein LOC100275617 precursor			GRMZM2G123886
MQTL3.01	GRMZM2G133802	Zm00001d040508	Zm00001eb129360	542418	tubulin beta-5 chain			GRMZM2G124061
MQTL3.01	GRMZM2G133802	Zm00001d040509	Zm00001eb129360	542418	tubulin beta-5 chain			GRMZM2G124136
MQTL3.01	GRMZM2G138097	Zm00001d040348	Zm00001eb128210					GRMZM2G124175
MQTL3.01	GRMZM2G144648	Zm00001d040399	Zm00001eb128620					GRMZM2G124229
MQTL3.01	GRMZM2G145449	Zm00001d040341	Zm00001eb128160	100273860	uncharacterized protein LOC100273860			GRMZM2G124243
MQTL3.01	GRMZM2G149605	Zm00001d040379	Zm00001eb128450	103649994	expansin-A11			GRMZM2G124290
MQTL3.01	GRMZM2G149609	Zm00001d040380	Zm00001eb128460	103651899	probable FAD synthase			GRMZM2G124396
MQTL3.01	GRMZM2G150167	Zm00001d040358	Zm00001eb128270					GRMZM2G124411
MQTL3.01	GRMZM2G150167	Zm00001d040359	Zm00001eb128270					GRMZM2G124441
MQTL3.01	GRMZM2G150167	Zm00001d040358	Zm00001eb128280					GRMZM2G124473
MQTL3.01	GRMZM2G150167	Zm00001d040359	Zm00001eb128280					GRMZM2G124530
MQTL3.01	GRMZM2G151671	Zm00001d040315						GRMZM2G124553
MQTL3.01	GRMZM2G154078	Zm00001d040517	Zm00001eb129420	103650048	vegetative cell wall protein gp1 precursor			GRMZM2G124701
MQTL3.01	GRMZM2G157316	Zm00001d040411	Zm00001eb128690	100191325	uncharacterized protein LOC100191325			GRMZM2G124715
MQTL3.01	GRMZM2G160136	Zm00001d040500	Zm00001eb129290					GRMZM2G124758
MQTL3.01	GRMZM2G161310	Zm00001d040468	Zm00001eb129050	100273965	uncharacterized protein LOC100273965			GRMZM2G124872
MQTL3.01	GRMZM2G162369	Zm00001d040467	Zm00001eb129040					GRMZM2G125151
MQTL3.01	GRMZM2G162453	Zm00001d040466	Zm00001eb129030	100279461	uncharacterized protein LOC100279461 precursor			GRMZM2G125233
MQTL3.01	GRMZM2G178460	Zm00001d040351	Zm00001eb128220	100283930	uncharacterized protein LOC100283930			GRMZM2G125350
MQTL3.01	GRMZM2G178470							GRMZM2G125352
MQTL3.01	GRMZM2G179910							GRMZM2G125356
MQTL3.01	GRMZM2G179918	Zm00001d040405	Zm00001eb128650					GRMZM2G125424
MQTL3.01	GRMZM2G301642	Zm00001d040464	Zm00001eb129010	107275231	uncharacterized protein LOC107275231			GRMZM2G125432
MQTL3.01	GRMZM2G305264	Zm00001d040445	Zm00001eb128880	100383341	uncharacterized protein LOC100383341			GRMZM2G125441
MQTL3.01	GRMZM2G310465	Zm00001d040489	Zm00001eb129190					GRMZM2G125452
MQTL3.01	GRMZM2G310465	Zm00001d040489	Zm00001eb129200					GRMZM2G125494
MQTL3.01	GRMZM2G311401	Zm00001d040505	Zm00001eb129340					GRMZM2G125635
MQTL3.01	GRMZM2G334891	Zm00001d040499	Zm00001eb129260					GRMZM2G125832
MQTL3.01	GRMZM2G334917	Zm00001d040499	Zm00001eb129270					GRMZM2G126062
MQTL3.01	GRMZM2G334917	Zm00001d040499	Zm00001eb129270					GRMZM2G126253
MQTL3.01	GRMZM2G358655	Zm00001d040481	Zm00001eb129140					GRMZM2G126471
MQTL3.01	GRMZM2G368388	Zm00001d040324	Zm00001eb128070	103649969	serine/threonine-protein kinase-like protein At5g23170			GRMZM2G126517
MQTL3.01	GRMZM2G378442	Zm00001d040460	Zm00001eb128970					GRMZM2G126572
MQTL3.01	GRMZM2G378442	Zm00001d040461	Zm00001eb128980					GRMZM2G126580
MQTL3.01	GRMZM2G378442	Zm00001d040461	Zm00001eb128980					GRMZM2G126642
MQTL3.01	GRMZM2G378872	Zm00001d040431	Zm00001eb128790					GRMZM2G126972
MQTL3.01	GRMZM2G386245	Zm00001d040465	Zm00001eb129020					GRMZM2G126988
MQTL3.01	GRMZM2G391359							GRMZM2G126990
MQTL3.01	GRMZM2G396767	Zm00001d040518	Zm00001eb129430					GRMZM2G127139
MQTL3.01	GRMZM2G396835		Zm00001eb129450					GRMZM2G127173
MQTL3.01	GRMZM2G404316	Zm00001d040441	Zm00001eb128850	100277730	uncharacterized protein LOC100277730			GRMZM2G127184
MQTL3.01	GRMZM2G416708	Zm00001d040385	Zm00001eb128510					GRMZM2G127412
MQTL3.01	GRMZM2G419085	Zm00001d040357	Zm00001eb128260	100284614	BCAS2 protein			GRMZM2G127418
MQTL3.01	GRMZM2G419111	Zm00001d040356	Zm00001eb128250	103649981	geranylgeranyl diphosphate reductase, chloroplastic-like			GRMZM2G127457
MQTL3.01	GRMZM2G428964	Zm00001d040409	Zm00001eb128680	100192759	uncharacterized protein LOC100192759			GRMZM2G127650
MQTL3.01	GRMZM2G430115							GRMZM2G127687
MQTL3.01	GRMZM2G430929	Zm00001d040434	Zm00001eb128800					GRMZM2G127690
MQTL3.01	GRMZM2G431251	Zm00001d040342						GRMZM2G127720
MQTL3.01	GRMZM2G431306	Zm00001d040343	Zm00001eb128190	100383468	putative splicing factor 3A subunit 1			GRMZM2G128268
MQTL3.01	GRMZM2G435393	Zm00001d040479	Zm00001eb129120	103650032	bisdemethoxycurcumin synthase			GRMZM2G128504
MQTL3.01	GRMZM2G435393	Zm00001d040479	Zm00001eb129130					GRMZM2G128807
MQTL3.01	GRMZM2G437509	Zm00001d040415	Zm00001eb128710	103651906				GRMZM2G128895
MQTL3.01	GRMZM2G440605	Zm00001d040333	Zm00001eb128120					GRMZM2G128922
MQTL3.01	GRMZM2G440614	Zm00001d040331	Zm00001eb128110	100280181	uncharacterized protein LOC100280181			GRMZM2G128938
MQTL3.01	GRMZM2G443690	Zm00001d040398	Zm00001eb128610					GRMZM2G128969
MQTL3.01	GRMZM2G451756	Zm00001d040378						GRMZM2G128992
MQTL3.01	GRMZM2G460869	Zm00001d040428	Zm00001eb128770					GRMZM2G129090
MQTL3.01	GRMZM2G463525	Zm00001d040455	Zm00001eb128930	103650023	cyclic dof factor 2			GRMZM2G129092
MQTL3.01	GRMZM2G466772	Zm00001d040342						GRMZM2G129146
MQTL3.01	GRMZM2G469673	Zm00001d040429						GRMZM2G129261
MQTL3.01	GRMZM2G479373		Zm00001eb128230					GRMZM2G129304
MQTL3.01	GRMZM2G479373		Zm00001eb128240					GRMZM2G129386
MQTL3.01	GRMZM2G480256							GRMZM2G129399
MQTL3.01	GRMZM2G529658							GRMZM2G129450
MQTL3.01	GRMZM2G552160							GRMZM2G129585
MQTL3.01	GRMZM2G554475	Zm00001d040369	Zm00001eb128390					GRMZM2G129615
MQTL3.01	GRMZM2G554475	Zm00001d040369	Zm00001eb128390					GRMZM2G129635
MQTL3.01	GRMZM2G554475	Zm00001d040370	Zm00001eb128390					GRMZM2G129817
MQTL3.01	GRMZM2G554475	Zm00001d040370	Zm00001eb128390					GRMZM2G129865
MQTL3.01	GRMZM2G554475	Zm00001d040369	Zm00001eb128400					GRMZM2G129889
MQTL3.01	GRMZM2G554475	Zm00001d040370	Zm00001eb128400					GRMZM2G129913
MQTL3.01	GRMZM2G561067							GRMZM2G129947
MQTL3.01	GRMZM2G575837							GRMZM2G130053
MQTL3.01	GRMZM2G701441	Zm00001d040332						GRMZM2G130065
MQTL3.01	GRMZM2G701445							GRMZM2G130131
MQTL3.01	GRMZM2G701454							GRMZM2G130167
MQTL3.01	GRMZM2G701469		Zm00001eb129410					GRMZM2G130213
MQTL3.01	GRMZM5G801307	Zm00001d040450	Zm00001eb128920					GRMZM2G130348
MQTL3.01	GRMZM5G806630							GRMZM2G130366
MQTL3.01	GRMZM5G809578							GRMZM2G130432
MQTL3.01	GRMZM5G819807	Zm00001d040322	Zm00001eb128020	100272400	uncharacterized protein LOC100272400			GRMZM2G130442
MQTL3.01	GRMZM5G832452	Zm00001d040368	Zm00001eb128360					GRMZM2G130454
MQTL3.01	GRMZM5G840699	Zm00001d040456	Zm00001eb128940	103650024	phospholipid-transporting ATPase 1 isoform X1			GRMZM2G130486
MQTL3.01	GRMZM5G850657							GRMZM2G130544
MQTL3.01	GRMZM5G856928							GRMZM2G130580
MQTL3.01	GRMZM5G859999	Zm00001d040336						GRMZM2G130625
MQTL3.01	GRMZM5G865115							GRMZM2G130675
MQTL3.02	AC191782.3_FG001							GRMZM2G130678
MQTL3.02	AC195168.2_FG004							GRMZM2G130755
MQTL3.02	GRMZM2G001426	Zm00001d044065	Zm00001eb158520	103650192	uncharacterized protein LOC103650192			GRMZM2G131024
MQTL3.02	GRMZM2G002536							GRMZM2G131055
MQTL3.02	GRMZM2G010085	Zm00001d040831	Zm00001eb131790	103650180	probable chromatin-remodeling complex ATPase chain isoform X2			GRMZM2G131155
MQTL3.02	GRMZM2G015277	Zm00001d040831	Zm00001eb131790	103650180	probable chromatin-remodeling complex ATPase chain isoform X2			GRMZM2G131177
MQTL3.02	GRMZM2G017853	Zm00001d040827	Zm00001eb131760	100193101	uncharacterized protein LOC100193101			GRMZM2G131202
MQTL3.02	GRMZM2G017853	Zm00001d040828	Zm00001eb131760	100193101	uncharacterized protein LOC100193101			GRMZM2G131309
MQTL3.02	GRMZM2G025222	Zm00001d044069	Zm00001eb158550	100280444	uncharacterized protein LOC100280444			GRMZM2G131321
MQTL3.02	GRMZM2G031429	Zm00001d040820	Zm00001eb131700	100382499	uncharacterized protein LOC100382499			GRMZM2G131356
MQTL3.02	GRMZM2G031568	Zm00001d040818	Zm00001eb131690	103650176	acyltransferase-like protein At1g54570, chloroplastic isoform X2			GRMZM2G131391
MQTL3.02	GRMZM2G034896	Zm00001d040805	Zm00001eb131620	100384248	uncharacterized protein LOC100384248			GRMZM2G131448
MQTL3.02	GRMZM2G047919	Zm00001d040855	Zm00001eb131930					GRMZM2G131529
MQTL3.02	GRMZM2G047919	Zm00001d040857	Zm00001eb131930					GRMZM2G131943
MQTL3.02	GRMZM2G052796	Zm00001d040837	Zm00001eb131840	103650187	glutaredoxin-C1			GRMZM2G131988
MQTL3.02	GRMZM2G055458	Zm00001d040798	Zm00001eb131550	100285737	thiamin pyrophosphokinase 1			GRMZM2G131998
MQTL3.02	GRMZM2G065388	Zm00001d040864	Zm00001eb131990					GRMZM2G132000
MQTL3.02	GRMZM2G065388	Zm00001d040865	Zm00001eb131990					GRMZM2G132060
MQTL3.02	GRMZM2G068947	Zm00001d040842	Zm00001eb131870	732733	opr6; 12-oxophytodienoate reductase6			GRMZM2G132121
MQTL3.02	GRMZM2G083635	Zm00001d040835						GRMZM2G132331
MQTL3.02	GRMZM2G084242		Zm00001eb132000					GRMZM2G132358
MQTL3.02	GRMZM2G088653	Zm00001d040796	Zm00001eb131540					GRMZM2G132450
MQTL3.02	GRMZM2G088727	Zm00001d040795	Zm00001eb131530					GRMZM2G132465
MQTL3.02	GRMZM2G095039	Zm00001d040803	Zm00001eb131590	100276849	Rapid alkalinization factor 1 precursor			GRMZM2G132522
MQTL3.02	GRMZM2G096008	Zm00001d040839	Zm00001eb131860	103650190	protein SODIUM POTASSIUM ROOT DEFECTIVE 1			GRMZM2G132751
MQTL3.02	GRMZM2G104639	Zm00001d040807	Zm00001eb131630	100191924	CASP-like protein 1E1			GRMZM2G132857
MQTL3.02	GRMZM2G110286	Zm00001d040836	Zm00001eb131830	103650186	glutaredoxin-C1			GRMZM2G132903
MQTL3.02	GRMZM2G156251	Zm00001d040829	Zm00001eb131770	100193551	uncharacterized protein LOC100193551			GRMZM2G132968
MQTL3.02	GRMZM2G156333	Zm00001d040830	Zm00001eb131780					GRMZM2G132994
MQTL3.02	GRMZM2G160113	Zm00001d040838	Zm00001eb131850					GRMZM2G133016
MQTL3.02	GRMZM2G164542	Zm00001d040826	Zm00001eb131750					GRMZM2G133028
MQTL3.02	GRMZM2G304700	Zm00001d044068	Zm00001eb158530					GRMZM2G133077
MQTL3.02	GRMZM2G304700	Zm00001d044068	Zm00001eb158540					GRMZM2G133396
MQTL3.02	GRMZM2G314652	Zm00001d040850	Zm00001eb131900					GRMZM2G133512
MQTL3.02	GRMZM2G328005							GRMZM2G133624
MQTL3.02	GRMZM2G329944	Zm00001d040865	Zm00001eb132680	100274261	uncharacterized protein LOC100274261			GRMZM2G133716
MQTL3.02	GRMZM2G329944	Zm00001d040864	Zm00001eb131990					GRMZM2G133720
MQTL3.02	GRMZM2G329952	Zm00001d040865	Zm00001eb132680	100274261	uncharacterized protein LOC100274261			GRMZM2G133895
MQTL3.02	GRMZM2G329952	Zm00001d040864	Zm00001eb131990					GRMZM2G133969
MQTL3.02	GRMZM2G367459							GRMZM2G134393
MQTL3.02	GRMZM2G383154	Zm00001d040804	Zm00001eb131600	100275611	uncharacterized protein LOC100275611			GRMZM2G134419
MQTL3.02	GRMZM2G386281		Zm00001eb132010					GRMZM2G134432
MQTL3.02	GRMZM2G412848	Zm00001d040874	Zm00001eb132050	103652012				GRMZM2G134439
MQTL3.02	GRMZM2G412848	Zm00001d040875	Zm00001eb132050	103652012				GRMZM2G134539
MQTL3.02	GRMZM2G416322	Zm00001d040823	Zm00001eb131710					GRMZM2G134604
MQTL3.02	GRMZM2G422932	Zm00001d040817						GRMZM2G134613
MQTL3.02	GRMZM2G436770	Zm00001d040810	Zm00001eb131660					GRMZM2G134655
MQTL3.02	GRMZM2G510656							GRMZM2G134668
MQTL3.02	GRMZM2G528319							GRMZM2G134770
MQTL3.02	GRMZM2G587231							GRMZM2G134862
MQTL3.02	GRMZM2G701557							GRMZM2G134947
MQTL3.02	GRMZM2G701559							GRMZM2G135175
MQTL3.02	GRMZM2G701564							GRMZM2G135228
MQTL3.02	GRMZM2G701566	Zm00001d040873	Zm00001eb132020					GRMZM2G135236
MQTL3.02	GRMZM5G833328							GRMZM2G135286
MQTL3.02	GRMZM5G848857	Zm00001d040846	Zm00001eb131880					GRMZM2G135291
MQTL3.02	GRMZM5G848879							GRMZM2G135385
MQTL3.03	AC196143.2_FG003							GRMZM2G135430
MQTL3.03	AC197150.3_FG003	Zm00001d041309	Zm00001eb134710	103650266	putative cyclic nucleotide-gated ion channel 9			GRMZM2G135446
MQTL3.03	GRMZM2G009593	Zm00001d041307	Zm00001eb134690	103650267	serine/threonine-protein phosphatase BSL2 homolog			GRMZM2G135470
MQTL3.03	GRMZM2G009715	Zm00001d041308	Zm00001eb134700					GRMZM2G135513
MQTL3.03	GRMZM2G061527	Zm00001d041327	Zm00001eb134820					GRMZM2G135629
MQTL3.03	GRMZM2G098957	Zm00001d041322	Zm00001eb134780	100282366	uncharacterized protein LOC100282366			GRMZM2G135655
MQTL3.03	GRMZM2G099206							GRMZM2G135727
MQTL3.03	GRMZM2G300437							GRMZM2G135770
MQTL3.03	GRMZM2G349268	Zm00001d041305	Zm00001eb134670					GRMZM2G135940
MQTL3.03	GRMZM2G363503	Zm00001d041315	Zm00001eb134750					GRMZM2G135990
MQTL3.03	GRMZM2G400223	Zm00001d041323	Zm00001eb134790					GRMZM2G136039
MQTL3.03	GRMZM2G480380	Zm00001d041326	Zm00001eb134810					GRMZM2G136300
MQTL3.03	GRMZM2G480381	Zm00001d041325	Zm00001eb134800	103650263	pentatricopeptide repeat-containing protein At5g16640, mitochondrial isoform X1			GRMZM2G136465
MQTL3.03	GRMZM5G858784	Zm00001d041319	Zm00001eb134770					GRMZM2G136563
MQTL3.03	GRMZM5G895604	Zm00001d041311						GRMZM2G136879
MQTL3.04	AC194101.3_FG001		Zm00001eb133570	100193217	uncharacterized protein LOC100193217			GRMZM2G137046
MQTL3.04	AC205833.3_FG002							GRMZM2G137293
MQTL3.04	AC207793.3_FG002	Zm00001d041152						GRMZM2G137341
MQTL3.04	AC210593.3_FG001							GRMZM2G137421
MQTL3.04	AC214353.3_FG003	Zm00001d040988	Zm00001eb132680	100274261	uncharacterized protein LOC100274261			GRMZM2G137435
MQTL3.04	AC214353.3_FG003	Zm00001d040986						GRMZM2G137440
MQTL3.04	AC233900.1_FG002							GRMZM2G137507
MQTL3.04	GRMZM2G000076	Zm00001d041161	Zm00001eb133750					GRMZM2G137510
MQTL3.04	GRMZM2G003507							GRMZM2G137694
MQTL3.04	GRMZM2G004663	Zm00001d041160	Zm00001eb133740					GRMZM2G137715
MQTL3.04	GRMZM2G005516		Zm00001eb132870					GRMZM2G137829
MQTL3.04	GRMZM2G013613	Zm00001d040975						GRMZM2G137847
MQTL3.04	GRMZM2G029267							GRMZM2G137920
MQTL3.04	GRMZM2G029956	Zm00001d040985						GRMZM2G137954
MQTL3.04	GRMZM2G042855	Zm00001d041136	Zm00001eb133580	103650352	uncharacterized protein LOC103650352 isoform X1			GRMZM2G138003
MQTL3.04	GRMZM2G045714	Zm00001d040981	Zm00001eb132660	100193803	uncharacterized protein LOC100193803			GRMZM2G138060
MQTL3.04	GRMZM2G045816	Zm00001d040980	Zm00001eb132650	103650372	uncharacterized protein LOC103650372			GRMZM2G138097
MQTL3.04	GRMZM2G054852	Zm00001d040997	Zm00001eb132730					GRMZM2G138198
MQTL3.04	GRMZM2G055545	Zm00001d041163	Zm00001eb133760	103650334	protein NRT1/ PTR FAMILY 4.3 isoform X1			GRMZM2G138248
MQTL3.04	GRMZM2G062531	Zm00001d040979	Zm00001eb132640	100217119	uncharacterized protein LOC100217119			GRMZM2G138259
MQTL3.04	GRMZM2G067223	Zm00001d041154	Zm00001eb133700	103650339	uncharacterized protein LOC103650339			GRMZM2G138268
MQTL3.04	GRMZM2G067231							GRMZM2G138370
MQTL3.04	GRMZM2G074373	Zm00001d041142	Zm00001eb133640	100192709	uncharacterized protein LOC100192709			GRMZM2G138744
MQTL3.04	GRMZM2G083643	Zm00001d041006	Zm00001eb132790	103650384	uncharacterized protein LOC103650384			GRMZM2G138886
MQTL3.04	GRMZM2G094081	Zm00001d041158	Zm00001eb133730					GRMZM2G139024
MQTL3.04	GRMZM2G094100	Zm00001d041157	Zm00001eb133720					GRMZM2G139028
MQTL3.04	GRMZM2G097533	Zm00001d041165	Zm00001eb133780					GRMZM2G139066
MQTL3.04	GRMZM2G125832	Zm00001d041004	Zm00001eb132750	100381796	uncharacterized protein LOC100381796			GRMZM2G139472
MQTL3.04	GRMZM2G126309							GRMZM2G139478
MQTL3.04	GRMZM2G139472	Zm00001d040972						GRMZM2G139517
MQTL3.04	GRMZM2G145201	Zm00001d040988	Zm00001eb132680	100274261	uncharacterized protein LOC100274261			GRMZM2G139583
MQTL3.04	GRMZM2G145201	Zm00001d040986						GRMZM2G139650
MQTL3.04	GRMZM2G156533		Zm00001eb133690					GRMZM2G139680
MQTL3.04	GRMZM2G156813	Zm00001d041025	Zm00001eb132840					GRMZM2G139700
MQTL3.04	GRMZM2G169702		Zm00001eb133560					GRMZM2G139805
MQTL3.04	GRMZM2G301893							GRMZM2G139878
MQTL3.04	GRMZM2G306193	Zm00001d041032						GRMZM2G139920
MQTL3.04	GRMZM2G311811							GRMZM2G140095
MQTL3.04	GRMZM2G316106	Zm00001d041147						GRMZM2G140179
MQTL3.04	GRMZM2G353957	Zm00001d040996	Zm00001eb132720	103650380	calcium-dependent protein kinase 27			GRMZM2G140355
MQTL3.04	GRMZM2G373272							GRMZM2G140500
MQTL3.04	GRMZM2G373277	Zm00001d041143						GRMZM2G140669
MQTL3.04	GRMZM2G373292	Zm00001d041144						GRMZM2G140694
MQTL3.04	GRMZM2G395853	Zm00001d041135						GRMZM2G140730
MQTL3.04	GRMZM2G400079							GRMZM2G140737
MQTL3.04	GRMZM2G400821							GRMZM2G140739
MQTL3.04	GRMZM2G401179	Zm00001d040974	Zm00001eb132620					GRMZM2G141071
MQTL3.04	GRMZM2G409893		Zm00001eb132610					GRMZM2G141133
MQTL3.04	GRMZM2G416913	Zm00001d041005	Zm00001eb132780					GRMZM2G141136
MQTL3.04	GRMZM2G428672		Zm00001eb133520					GRMZM2G141150
MQTL3.04	GRMZM2G428676		Zm00001eb133510					GRMZM2G141152
MQTL3.04	GRMZM2G461566							GRMZM2G141376
MQTL3.04	GRMZM2G461983							GRMZM2G141399
MQTL3.04	GRMZM2G701614							GRMZM2G141503
MQTL3.04	GRMZM2G701633	Zm00001d041157	Zm00001eb133720					GRMZM2G141605
MQTL3.04	GRMZM2G701635	Zm00001d041157						GRMZM2G141618
MQTL3.04	GRMZM5G823484	Zm00001d041138	Zm00001eb133590					GRMZM2G141667
MQTL3.04	GRMZM5G823484	Zm00001d041139	Zm00001eb133600					GRMZM2G141819
MQTL3.04	GRMZM5G823484	Zm00001d041139	Zm00001eb133600					GRMZM2G141903
MQTL3.04	GRMZM5G825444							GRMZM2G141940
MQTL3.04	GRMZM5G837123	Zm00001d040991						GRMZM2G141948
MQTL3.04	GRMZM5G839743							GRMZM2G141975
MQTL3.04	GRMZM5G842865		Zm00001eb133560					GRMZM2G142043
MQTL3.04	GRMZM5G844021							GRMZM2G142109
MQTL3.04	GRMZM5G855629	Zm00001d041137						GRMZM2G142111
MQTL3.04	GRMZM5G860768		Zm00001eb133560					GRMZM2G142266
MQTL3.04	GRMZM5G878270		Zm00001eb132830					GRMZM2G142352
MQTL3.04	GRMZM5G878970	Zm00001d041127	Zm00001eb133530	100278920	uncharacterized protein LOC100278920			GRMZM2G142390
MQTL3.04	GRMZM5G892762							GRMZM2G142565
MQTL3.05	AC210189.3_FG003							GRMZM2G142620
MQTL3.05	AC211749.4_FG007	Zm00001d041382	Zm00001eb135270					GRMZM2G142664
MQTL3.05	GRMZM2G022629	Zm00001d041410	Zm00001eb135520	103650465	uncharacterized protein LOC103650465			GRMZM2G142672
MQTL3.05	GRMZM2G035338	Zm00001d041415	Zm00001eb135540	100272360	uncharacterized protein LOC100272360			GRMZM2G142825
MQTL3.05	GRMZM2G053692	Zm00001d041399	Zm00001eb135420					GRMZM2G143010
MQTL3.05	GRMZM2G059703	Zm00001d041380	Zm00001eb135240	100381451	uncharacterized protein LOC100381451			GRMZM2G143168
MQTL3.05	GRMZM2G069758	Zm00001d041407	Zm00001eb135500	100283562	pyridoxal kinase			GRMZM2G143354
MQTL3.05	GRMZM2G069758	Zm00001d041407	Zm00001eb135510					GRMZM2G143397
MQTL3.05	GRMZM2G075900	Zm00001d041420	Zm00001eb135590					GRMZM2G143403
MQTL3.05	GRMZM2G095331	Zm00001d041390	Zm00001eb135350					GRMZM2G143590
MQTL3.05	GRMZM2G105766	Zm00001d041422	Zm00001eb135610					GRMZM2G143786
MQTL3.05	GRMZM2G116574	Zm00001d041405	Zm00001eb135470	100382051	putative RING zinc finger domain superfamily protein			GRMZM2G144002
MQTL3.05	GRMZM2G138268	Zm00001d041416	Zm00001eb135550					GRMZM2G144011
MQTL3.05	GRMZM2G144011							GRMZM2G144044
MQTL3.05	GRMZM2G145300	Zm00001d041395	Zm00001eb135380					GRMZM2G144088
MQTL3.05	GRMZM2G157825	Zm00001d041403	Zm00001eb135450	103650464	uncharacterized protein LOC103650464			GRMZM2G144097
MQTL3.05	GRMZM2G157873	Zm00001d041404	Zm00001eb135460	100284445	pectinesterase inhibitor domain containing protein precursor			GRMZM2G144254
MQTL3.05	GRMZM2G167794	Zm00001d041418	Zm00001eb135570	100192924	uncharacterized protein LOC100192924			GRMZM2G144367
MQTL3.05	GRMZM2G173424	Zm00001d041392	Zm00001eb135370	100192607	uncharacterized protein LOC100192607			GRMZM2G144420
MQTL3.05	GRMZM2G173424	Zm00001d041393	Zm00001eb135370	100192607	uncharacterized protein LOC100192607			GRMZM2G144581
MQTL3.05	GRMZM2G173680	Zm00001d041397	Zm00001eb135400	100191630	uncharacterized protein LOC100191630			GRMZM2G144648
MQTL3.05	GRMZM2G176282	Zm00001d041382	Zm00001eb135280	100274980	uncharacterized protein LOC100274980			GRMZM2G144662
MQTL3.05	GRMZM2G176282	Zm00001d041382	Zm00001eb135280	100274980	uncharacterized protein LOC100274980			GRMZM2G144853
MQTL3.05	GRMZM2G176363							GRMZM2G144915
MQTL3.05	GRMZM2G325413							GRMZM2G145041
MQTL3.05	GRMZM2G328780	Zm00001d041402	Zm00001eb135440	100283420	uncharacterized protein LOC100283420			GRMZM2G145088
MQTL3.05	GRMZM2G353828	Zm00001d041399	Zm00001eb135420					GRMZM2G145112
MQTL3.05	GRMZM2G353834		Zm00001eb135430					GRMZM2G145131
MQTL3.05	GRMZM2G368126	Zm00001d041381	Zm00001eb135250	103650457	protein JINGUBANG			GRMZM2G145201
MQTL3.05	GRMZM2G377595	Zm00001d041421	Zm00001eb135600					GRMZM2G145275
MQTL3.05	GRMZM2G403475	Zm00001d041426						GRMZM2G145300
MQTL3.05	GRMZM2G441768	Zm00001d041414	Zm00001eb135530					GRMZM2G145370
MQTL3.05	GRMZM2G444621	Zm00001d041430	Zm00001eb135650	100280399	uncharacterized protein LOC100280399			GRMZM2G145437
MQTL3.05	GRMZM2G457411	Zm00001d041387	Zm00001eb135320					GRMZM2G145444
MQTL3.05	GRMZM2G477885	Zm00001d041384	Zm00001eb135300					GRMZM2G145449
MQTL3.05	GRMZM2G477894	Zm00001d041385	Zm00001eb135310					GRMZM2G145500
MQTL3.05	GRMZM2G523606							GRMZM2G145599
MQTL3.05	GRMZM5G849435	Zm00001d041431	Zm00001eb135660					GRMZM2G145651
MQTL3.05	GRMZM5G849435	Zm00001d041432	Zm00001eb135660					GRMZM2G145666
MQTL3.05	GRMZM5G869550	Zm00001d041389	Zm00001eb135330					GRMZM2G145758
MQTL3.05	GRMZM5G869550	Zm00001d041389	Zm00001eb135340					GRMZM2G145909
MQTL3.06	AC187222.4_FG001							GRMZM2G145968
MQTL3.06	AC190589.2_FG002							GRMZM2G145989
MQTL3.06	AC209377.3_FG003	Zm00001d041790	Zm00001eb138460					GRMZM2G146118
MQTL3.06	AC213398.3_FG004	Zm00001d041812						GRMZM2G146331
MQTL3.06	AC213398.3_FG005	Zm00001d041813						GRMZM2G146374
MQTL3.06	AC213398.3_FG007		Zm00001eb138620					GRMZM2G146446
MQTL3.06	AC216010.3_FG001	Zm00001d041833	Zm00001eb138750	100280567	pseudouridylate synthase			GRMZM2G146449
MQTL3.06	AC231425.1_FG006							GRMZM2G146463
MQTL3.06	GRMZM2G010775	Zm00001d041854	Zm00001eb138930					GRMZM2G146472
MQTL3.06	GRMZM2G024827	Zm00001d041830	Zm00001eb138720					GRMZM2G146518
MQTL3.06	GRMZM2G024851	Zm00001d041831	Zm00001eb138730	100281065	uncharacterized protein LOC100281065			GRMZM2G146754
MQTL3.06	GRMZM2G027632		Zm00001eb138870					GRMZM2G146847
MQTL3.06	GRMZM2G031167	Zm00001d041842	Zm00001eb138820	103650635	amino acid permease 3			GRMZM2G146862
MQTL3.06	GRMZM2G032304	Zm00001d041836	Zm00001eb138770					GRMZM2G146866
MQTL3.06	GRMZM2G032304	Zm00001d041836	Zm00001eb138780					GRMZM2G147014
MQTL3.06	GRMZM2G032384	Zm00001d041834	Zm00001eb138760					GRMZM2G147046
MQTL3.06	GRMZM2G032384	Zm00001d041835	Zm00001eb138760					GRMZM2G147377
MQTL3.06	GRMZM2G041415	Zm00001d041853	Zm00001eb138920	100125635	transcription factor MYB8			GRMZM2G147430
MQTL3.06	GRMZM2G046609	Zm00001d041844	Zm00001eb138830	103650637	probable methyltransferase PMT26			GRMZM2G147450
MQTL3.06	GRMZM2G059393	Zm00001d041855	Zm00001eb138940	100274149	uncharacterized protein LOC100274149			GRMZM2G147619
MQTL3.06	GRMZM2G080107	Zm00001d041819	Zm00001eb138650					GRMZM2G147667
MQTL3.06	GRMZM2G081016	Zm00001d041784	Zm00001eb138400					GRMZM2G147685
MQTL3.06	GRMZM2G087413	Zm00001d041822	Zm00001eb138660	100286270	uncharacterized protein LOC100286270 precursor			GRMZM2G147712
MQTL3.06	GRMZM2G087513	Zm00001d041823	Zm00001eb138670	100273815	uncharacterized protein LOC100273815			GRMZM2G147726
MQTL3.06	GRMZM2G087582	Zm00001d041823	Zm00001eb138670	100273815	uncharacterized protein LOC100273815			GRMZM2G147756
MQTL3.06	GRMZM2G087590	Zm00001d041824	Zm00001eb138680					GRMZM2G147809
MQTL3.06	GRMZM2G090723	Zm00001d041850	Zm00001eb138890					GRMZM2G147862
MQTL3.06	GRMZM2G098815	Zm00001d041789	Zm00001eb138450	100280424	uncharacterized protein LOC100280424			GRMZM2G147880
MQTL3.06	GRMZM2G099978	Zm00001d041798						GRMZM2G147894
MQTL3.06	GRMZM2G099978	Zm00001d041799						GRMZM2G148014
MQTL3.06	GRMZM2G101221	Zm00001d041827	Zm00001eb138700	103650629	peroxidase 43			GRMZM2G148052
MQTL3.06	GRMZM2G117776	Zm00001d041857	Zm00001eb138970	103652225	filaggrin-2			GRMZM2G148056
MQTL3.06	GRMZM2G136288	Zm00001d041843						GRMZM2G148074
MQTL3.06	GRMZM2G138003	Zm00001d041800	Zm00001eb138550					GRMZM2G148198
MQTL3.06	GRMZM2G139700	Zm00001d041791						GRMZM2G148400
MQTL3.06	GRMZM2G143354	Zm00001d041785	Zm00001eb138410	541810	delta-COP			GRMZM2G148702
MQTL3.06	GRMZM2G160687	Zm00001d041781	Zm00001eb138380	542325	Zea AGAMOUS homolog2 isoform 2			GRMZM2G148751
MQTL3.06	GRMZM2G160697							GRMZM2G148872
MQTL3.06	GRMZM2G163507	Zm00001d041787	Zm00001eb138420					GRMZM2G148940
MQTL3.06	GRMZM2G163514	Zm00001d041788	Zm00001eb138430					GRMZM2G148954
MQTL3.06	GRMZM2G165176	Zm00001d041839	Zm00001eb138800	100192900	uncharacterized protein LOC100192900			GRMZM2G149060
MQTL3.06	GRMZM2G174769	Zm00001d041837	Zm00001eb138790					GRMZM2G149153
MQTL3.06	GRMZM2G174769	Zm00001d041838	Zm00001eb138790					GRMZM2G149224
MQTL3.06	GRMZM2G324157	Zm00001d041826	Zm00001eb138690	103650628				GRMZM2G149605
MQTL3.06	GRMZM2G338160	Zm00001d041794	Zm00001eb138510	100276191	uncharacterized protein LOC100276191 precursor			GRMZM2G149609
MQTL3.06	GRMZM2G340721	Zm00001d041846	Zm00001eb138840					GRMZM2G149714
MQTL3.06	GRMZM2G340756	Zm00001d041847	Zm00001eb138850	100216783	uncharacterized protein LOC100216783			GRMZM2G149824
MQTL3.06	GRMZM2G344300							GRMZM2G149994
[truncated: 3,081 more rows]
