# Supplementary material for: Comprehensive meta-analysis of QTL and gene expression studies identify candidate genes associated with Aspergillus flavus resistance in maize
Source: Front Plant Sci. 2023 Jul 18;14:1214907. doi: 10.3389/fpls.2023.1214907 (PMC10392829; doi:10.3389/fpls.2023.1214907)
Supplement: Supplementary file 7 [file Table_6.xlsx]

## Sheet: Sheet1
Supplementary Table S6. GO enrichment analysis of the candiate genes in MQTL intervals
								Biological process
GO term	Ontology	Description	# Genes in input list	# Genes in BG/Ref	p-value	FDR
GO:0040011	Biological process	locomotion	6	18	0.0065	0.0065
GO:0007033		vacuole organization	5	13	0.008	0.008
GO:0007129		synapsis	5	13	0.008	0.008
GO:0070192		chromosome organization involved in meiosis	5	13	0.008	0.008
GO:0051234		establishment of localization	217	2322	0.0081	0.0081
GO:0009416		response to light stimulus	56	498	0.009	0.009
GO:0055114		oxidation reduction	183	1931	0.0091	0.0091
GO:0050793		regulation of developmental process	38	311	0.0094	0.0094
GO:0009314		response to radiation	57	512	0.01	0.01
GO:0006810		transport	215	2313	0.01	0.01
GO:0043900		regulation of multi-organism process	7	27	0.01	0.01
GO:0051239		regulation of multicellular organismal process	33	263	0.011	0.011
GO:0051179		localization	220	2376	0.011	0.011
GO:0009753		response to jasmonic acid stimulus	19	131	0.014	0.014
GO:0006694		steroid biosynthetic process	8	39	0.02	0.02
GO:0051701		interaction with host	6	24	0.02	0.02
GO:0048519		negative regulation of biological process	42	372	0.02	0.02
GO:0009749		response to glucose stimulus	7	32	0.022	0.022
GO:0010228		vegetative to reproductive phase transition of meristem	16	110	0.022	0.022
GO:0042221		response to chemical stimulus	188	2052	0.025	0.025
GO:0045595		regulation of cell differentiation	11	67	0.026	0.026
GO:0016109		tetraterpenoid biosynthetic process	6	26	0.027	0.027
GO:0016117		carotenoid biosynthetic process	6	26	0.027	0.027
GO:0009415		response to water	31	264	0.027	0.027
GO:0048583		regulation of response to stimulus	24	194	0.03	0.03
GO:0009639		response to red or far red light	20	154	0.03	0.03
GO:0080134		regulation of response to stress	14	97	0.032	0.032
GO:0006473		protein amino acid acetylation	5	20	0.032	0.032
GO:0051510		regulation of unidimensional cell growth	5	20	0.032	0.032
GO:0016573		histone acetylation	5	20	0.032	0.032
GO:0008202		steroid metabolic process	9	52	0.033	0.033
GO:0048638		regulation of developmental growth	8	44	0.034	0.034
GO:0010109		regulation of photosynthesis	6	28	0.035	0.035
GO:0048573		photoperiodism, flowering	9	53	0.036	0.036
GO:0042592		homeostatic process	36	325	0.037	0.037		Celular component
GO:0009631		cold acclimation	5	21	0.038	0.038
GO:0031347		regulation of defense response	12	81	0.039	0.039
GO:0009628		response to abiotic stimulus	130	1397	0.039	0.039
GO:0034284		response to monosaccharide stimulus	7	37	0.039	0.039
GO:0009746		response to hexose stimulus	7	37	0.039	0.039
GO:0044403		symbiosis, encompassing mutualism through parasitism	6	29	0.04	0.04
GO:0042440		pigment metabolic process	17	130	0.041	0.041
GO:0065008		regulation of biological quality	74	753	0.043	0.043
GO:0007127		meiosis I	5	22	0.044	0.044
GO:0042446		hormone biosynthetic process	5	22	0.044	0.044
GO:0040008		regulation of growth	11	75	0.049	0.049
GO:0009648		photoperiodism	10	66	0.05	0.05
GO:0030145	Molecular function	manganese ion binding	25	70	1.3e-08	1.3e-08
GO:0045735		nutrient reservoir activity	28	100	1.4e-07	1.4e-07
GO:0016705		oxidoreductase activity, acting on paired donors, with incorporation or reduction of molecular oxygen	64	539	0.0018	0.0018
GO:0016491		oxidoreductase activity	201	2055	0.0018	0.0018
GO:0008081		phosphoric diester hydrolase activity	12	54	0.0028	0.0028
GO:0046914		transition metal ion binding	287	3109	0.0044	0.0044
GO:0043169		cation binding	371	4135	0.0061	0.0061
GO:0043167		ion binding	371	4136	0.0062	0.0062
GO:0020037		heme binding	64	575	0.0068	0.0068
GO:0004497		monooxygenase activity	33	255	0.0071	0.0071
GO:0016614		oxidoreductase activity, acting on CH-OH group of donors	33	255	0.0071	0.0071
GO:0046872		metal ion binding	369	4124	0.0072	0.0072
GO:0046906		tetrapyrrole binding	64	591	0.011	0.011
GO:0005215		transporter activity	120	1225	0.014	0.014
GO:0016616		oxidoreductase activity, acting on the CH-OH group of donors, NAD or NADP as acceptor	29	229	0.014	0.014
GO:0009055		electron carrier activity	66	628	0.018	0.018
GO:0008080		N-acetyltransferase activity	11	66	0.024	0.024
GO:0004721		phosphoprotein phosphatase activity	18	136	0.033	0.033
GO:0016307		phosphatidylinositol phosphate kinase activity	6	28	0.035	0.035
GO:0005198		structural molecule activity	76	767	0.035	0.035
GO:0016410		N-acyltransferase activity	11	71	0.036	0.036
GO:0003682		chromatin binding	46	434	0.037	0.037
GO:0016788		hydrolase activity, acting on ester bonds	91	951	0.045	0.045
GO:0008762		UDP-N-acetylmuramate dehydrogenase activity	7	39	0.048	0.048
GO:0016627		oxidoreductase activity, acting on the CH-CH group of donors	11	75	0.049	0.049
GO:0005773	Celular component	vacuole	93	867	0.0034	0.0034
GO:0005618		cell wall	72	659	0.0063	0.0063
GO:0012505		endomembrane system	39	314	0.0068	0.0068
GO:0005774		vacuolar membrane	46	387	0.0072	0.0072
GO:0016020		membrane	499	5709	0.0079	0.0079
GO:0030312		external encapsulating structure	73	680	0.0087	0.0087		Molecular Function
GO:0044437		vacuolar part	46	392	0.0088	0.0088
GO:0048046		apoplast	44	376	0.011	0.011
GO:0044425		membrane part	250	2755	0.015	0.015
GO:0044464		cell part	1018	12261	0.018	0.018
GO:0005623		cell	1018	12261	0.018	0.018
GO:0005576		extracellular region	61	575	0.019	0.019
GO:0000151		ubiquitin ligase complex	21	161	0.026	0.026
GO:0044431		Golgi apparatus part	33	290	0.033	0.033
GO:0000325		plant-type vacuole	15	109	0.038	0.038
GO:0005911		cell-cell junction	56	547	0.04	0.04
GO:0009506		plasmodesma	56	547	0.04	0.04
GO:0030054		cell junction	56	547	0.04	0.04
GO:0055044		symplast	56	547	0.04	0.04
GO:0044459		plasma membrane part	66	663	0.043	0.043
GO:0044446		intracellular organelle part	301	3454	0.044	0.044
GO:0005886		plasma membrane	214	2404	0.044	0.044
GO:0044422		organelle part	301	3457	0.045	0.045
