# Supplementary material for: Comprehensive meta-analysis of QTL and gene expression studies identify candidate genes associated with Aspergillus flavus resistance in maize
Source: Front Plant Sci. 2023 Jul 18;14:1214907. doi: 10.3389/fpls.2023.1214907 (PMC10392829; doi:10.3389/fpls.2023.1214907)
Supplement: Supplementary file 8 [file Table_7.xlsx]

## Sheet: Sheet1
Supplementary Table S7: KEGG analysis of the candidate genes in MQTL intervals
KEGG Pathway	# Genes	Pathway Genes	Fold Enrichment	Enrichment FDR
Metabolic pathways	150	1646	2.2	8.24e-05
Biosynthesis of secondary metabolites	89	926	2.3	236
Spliceosome	23	165	3.4	839000000
Ribosome	29	250	2.8	863000000
MRNA surveillance pathway	19	121	3.9	863000000
Phagosome	12	70	4.2	0.000395343
Carbon metabolism	21	200	2.6	0.00100898
Plant-pathogen interaction	16	138	2.8	0.00202413
RNA degradation	11	80	3.4	0.00441194
Valine, leucine and isoleucine degradation	7	35	4.9	0.00471897
Pyruvate metabolism	10	71	3.49	0.00544599
Glyoxylate and dicarboxylate metabolism	8	52	3.8	0.0098074
Citrate cycle (TCA cycle)	8	56	3.5	0.0146506
Tryptophan metabolism	6	33	4.5	0.0146506
Oxidative phosphorylation	10	91	2.7	0.019398
Lysine degradation	5	26	4.7	0.019398
Beta-Alanine metabolism	5	26	4.7	0.019398
Starch and sucrose metabolism	11	104	2.6	0.019398
Biosynthesis of cofactors	16	186	2.1	0.019398
Endocytosis	13	132	2.4	0.019398
Circadian rhythm	6	36	4.1	0.019398
Autophagy	5	28	4.4	0.0242322
Biosynthesis of amino acids	15	181	2	0.0325885
Ascorbate and aldarate metabolism	6	44	3.3	0.0356229
Propanoate metabolism	4	21	4.7	0.0356229
2-Oxocarboxylic acid metabolism	6	44	3.3	0.0356229
Phosphatidylinositol signaling system	7	58	2.9	0.0356229
Ubiquitin mediated proteolysis	10	104	2.3	0.0356229
Protein processing in endoplasmic reticulum	15	187	1.9	0.0356229
Carotenoid biosynthesis	4	23	4.3	0.0468491
MAPK signaling pathway	10	111	2.2	0.0512842
Phenylalanine, tyrosine and tryptophan biosynthesis	5	37	3.3	0.0548944
ABC transporters	3	14	5.3	0.0576207
Arginine and proline metabolism	5	39	3.18	0.0639102
Taurine and hypotaurine metabolism	2	6	8.2	0.0697386
Porphyrin and chlorophyll metabolism	5	42	2.9	0.0808496
Inositol phosphate metabolism	6	59	2.52	0.0936161
Carbon fixation in photosynthetic organisms	5	48	2.5	0.123612
Terpenoid backbone biosynthesis	5	48	2.5	0.123612
Diterpenoid biosynthesis	3	20	3.7	0.124583
Monobactam biosynthesis	2	9	5.5	0.131886
Butanoate metabolism	3	21	3.5	0.134408
Glycolysis / Gluconeogenesis	8	103	1.9	0.142912
Pentose and glucuronate interconversions	5	52	2.3	0.142912
Fatty acid elongation	3	22	3.3	0.142912
Phenylpropanoid biosynthesis	9	125	1.7	0.160122
Steroid biosynthesis	3	24	3.1	0.167398
Protein export	4	40	2.4	0.177489
Aminoacyl-tRNA biosynthesis	4	41	2.4	0.186818
Arginine biosynthesis	3	26	2.8	0.190696
