# Supplementary material for: Comprehensive meta-analysis of QTL and gene expression studies identify candidate genes associated with Aspergillus flavus resistance in maize
Source: Front Plant Sci. 2023 Jul 18;14:1214907. doi: 10.3389/fpls.2023.1214907 (PMC10392829; doi:10.3389/fpls.2023.1214907)
Supplement: Supplementary file 10 [file Table_9.xlsx]

## Sheet: Sheet1
Supplementary Table S9. Forty three putative Aspergillus flavus resistance associated genes in MQTL intervals
MQTLS	Gene	B73v4	B73V5	NCBI ID	Annotations
MQTL1.10	AF546187.1_FG007+B4:B45	Zm00001d030855	Zm00001eb030160	542652	z1D_4 alpha zein
MQTL10.01	AC194103.3_FG006	Zm00001d023758	Zm00001eb409590	103642333	RING-H2 finger protein ATL67
MQTL10.03	GRMZM2G142565	Zm00001d000004	Zm00001eb413280	100283927	postsynaptic protein CRIPT
MQTL10.04	AC196202.3_FG007	Zm00001d024442	Zm00001eb414860	103642517
MQTL10.06	GRMZM2G003917	Zm00001d025672	Zm00001eb424730	103641751	fasciclin-like arabinogalactan protein 7
MQTL10.06	GRMZM2G149994	Zm00001d025776	Zm00001eb425850	100192818	cell division control protein 48 homolog B
MQTL10.06	GRMZM2G301246	Zm00001d025651	Zm00001eb424550	100383372	Poly(A)-specific ribonuclease PARN
MQTL10.06	AC217043.3_FG002	Zm00001d025685	Zm00001eb424880
MQTL10.06	AC226227.2_FG004	Zm00001d025805	Zm00001eb426110
MQTL2.03	GRMZM5G870067	Zm00001d003488	Zm00001eb081230	100501354	UDP-glycosyltransferase 85A7
MQTL2.04	GRMZM2G147685	Zm00001d003677		109851609	UDP-glycosyltransferase 83A1
MQTL2.04	GRMZM2G329885	Zm00001d003664	Zm00001eb082760	103646446	uncharacterized
MQTL2.08	GRMZM2G119117	Zm00001d004927	Zm00001eb092840	107305673	Os12g0146300-like protein
MQTL2.08	AC203257.2_FG003	Zm00001d004797	Zm00001eb092370
MQTL3.01	GRMZM2G128895	Zm00001d040408	Zm00001eb128670	103650005	rab escort protein 1
MQTL3.01	GRMZM2G018782	Zm00001d040506		103650046	probable mediator of RNA polymerase II transcription subunit 26b
MQTL3.01	AC211403.4_FG005	Zm00001d040506	Zm00001eb129350
MQTL3.05	GRMZM2G157825	Zm00001d041403	Zm00001eb135450	103650464	uncharacterized
MQTL3.06	GRMZM2G087413	Zm00001d041822	Zm00001eb138660	100286270	uncharacterized
MQTL4.01	GRMZM2G026939	Zm00001d049476		100127498	z1A2_3 alpha zein
MQTL4.01	GRMZM2G315515	Zm00001d049516		103653061	zinc finger CCCH domain-containing protein 56-like
MQTL4.02	AC191070.3_FG006	Zm00001d049776	Zm00001eb174820
MQTL4.04	AC205496.3_FG002	Zm00001d050279
MQTL4.04	AC205615.4_FG002	Zm00001d050270
MQTL5.01	GRMZM2G030821	Zm00001d013246		103627979	Opaque endosperm 11
MQTL5.01	AC205490.4_FG004	Zm00001d013170	Zm00001eb213870
MQTL5.01	AC195340.3_FG005	Zm00001d013155
MQTL5.02	GRMZM2G130580	Zm00001d014110	Zm00001eb222450	100216815	uncharacterized
MQTL5.03	AC235548.1_FG002	Zm00001d014846	Zm00001eb228560
MQTL5.03	AC207107.4_FG001	Zm00001d014802
MQTL5.04	GRMZM2G431291	Zm00001d015594	Zm00001eb234580
MQTL5.04	AC194591.2_FG005	Zm00001d015588
MQTL5.04	AC212354.3_FG002	Zm00001d015717
MQTL5.06	GRMZM2G167431	Zm00001d017748	Zm00001eb251870	100193352	3-ketodihydrosphingosine reductase
MQTL5.06	GRMZM2G428438	Zm00001d017532		103627525	putative RING-H2 finger protein ATL71
MQTL5.06	GRMZM2G432002	Zm00001d017532		103627525	putative RING-H2 finger protein ATL71
MQTL5.06	GRMZM2G150374	Zm00001d017765	Zm00001eb251980	103627609	WAT1-related protein At5g45370
MQTL5.06	AC208539.3_FG002	Zm00001d017838
MQTL7.02	GRMZM2G343236	Zm00001d019274		100283882	pectinesterase inhibitor domain containing protein
MQTL7.02	GRMZM2G097030	Zm00001d019265		100384470	uncharacterized
MQTL7.03	AC198901.4_FG004	Zm00001d019564	Zm00001eb306390
MQTL7.03	AC208826.3_FG004	Zm00001d019570
MQTL8.01	GRMZM2G373928	Zm00001d008939	Zm00001eb338650	100127523	ZCN14 ZCN14 protein
MQTL9.02	AC234524.1_FG005	Zm00001d046479	Zm00001eb386120
MQTL9.02	AC200739.5_FG001	Zm00001d046407
