# Supplementary material for: Comprehensive meta-analysis of QTL and gene expression studies identify candidate genes associated with Aspergillus flavus resistance in maize
Source: Front Plant Sci. 2023 Jul 18;14:1214907. doi: 10.3389/fpls.2023.1214907 (PMC10392829; doi:10.3389/fpls.2023.1214907)
Supplement: Supplementary file 11 [file Table_10.xlsx]

## Sheet: Sheet1
Supplementary Table S10. Expression of 29 genes in MQTL intervals retrived from the qTeller database
gene_name	Reproductive_Drought	rmr6_Drought_Salt_T0	rmr6_Drought_Salt_T7	rmr6_Drought_T0	rmr6_Drought_T7	rmr6_Salt_T0	rmr6_Salt_T7	Vegetative_Drought	wt_Drought_Salt_T0	wt_Drought_Salt_T7	wt_Drought_T0	wt_Drought_T7	wt_Salt_T0	wt_Salt_T7		gene_name	Reproductive_Drought	rmr6_Drought_Salt_T7	rmr6_Drought_T0	rmr6_Drought_T7	rmr6_Salt_T0	rmr6_Salt_T7	Vegetative_Drought	wt_Drought_Salt_T0	wt_Drought_Salt_T7	wt_Drought_T0	wt_Drought_T7	wt_Salt_T0	wt_Salt_T7				B73v4	Annotations
Zm00001d030855	0	0	0	0	0	0	0	0	0	0	0	0	0	0		Zm00001d023758		-3.32193												-3.32193			Zm00001d000004	postsynaptic protein CRIPT
Zm00001d023758	-0.4	-0.1	0.1	0	0	0	0	0	-0.1	0	-0.1	-0.1	-0.1	0		Zm00001d024442		-0.321928				-2.32193			-2.32193					-4.96578			Zm00001d003488	UDP-glycosyltransferase 85A7
Zm00001d024442	-0.1	-0.5	0.8	-0.4	-0.1	0	0.2	0	-0.1	0.2	-0.2	-0.1	-0.2	0		Zm00001d025651	1.67807	-0.514573			-1.73697	-2.32193		-3.32193		-0.514573		-1	-2.32193	-10.0538			Zm00001d003664	uncharacterized
Zm00001d025651	3.2	-1.2	0.7	0	-0.2	0.3	0.2	-0.4	0.1	-0.2	0.7	-0.6	0.5	0.2		Zm00001d025685	-3.32193						-3.32193							-6.64386			Zm00001d004927	Os12g0146300-like protein
Zm00001d025672	0	0	0	0	0	0	0	0	0	0	0	0	0	0		Zm00001d025776	3.56071	-0.736966	0		0	-3.32193		-1.73697		-0.514573		-1.73697		-4.48668			Zm00001d008939	ZCN14 ZCN14 protein
Zm00001d025685	0	0	0	0	0	0	0.1	0	0	0	0	0	0			Zm00001d025805	-2.32193	-3.32193	-3.32193			-3.32193	-2.32193	-3.32193			-3.32193			-21.2535			Zm00001d013170
Zm00001d025776	-2	0.6	1	-0.5	1	0.1	-1	0.3	0	0.7	-0.5	0.3	0			Zm00001d003488		-3.32193		-3.32193	-3.32193						-3.32193			-13.2877			Zm00001d015588
Zm00001d025805	-0.5	0.1	0.1	0	0	0.1	0.2	0.1	0	0	0.1	0	0			Zm00001d003664	3.71149	1	0.378512	-1.73697	1.07039	-0.736966	-1	0.485427		-0.152003		-3.32193	-1.73697	-2.03901			Zm00001d015594
Zm00001d003488	0	0.1	0	0.1	0.1	0	0	-0.1	0	-0.1	0.1	0	0			Zm00001d004927		1.37851	0.485427		0.263034	-3.32193	-1.73697			-1.73697		-3.32193		-7.99081			Zm00001d017532	putative RING-H2 finger protein ATL71
Zm00001d003664	-3.1	2	1.3	0.3	2.1	0.6	0.5	1.4	0	0.9	-0.9	0.1	0.3			Zm00001d040408	-1	-3.32193			-2.32193					-1.73697		-1.73697		-10.1178			Zm00001d017748	3-ketodihydrosphingosine reductase
Zm00001d003677	0	0	0	0	0	0	0	0	0	0	0	0	0			Zm00001d041403							-3.32193		-2.32193				-3.32193	-8.96578			Zm00001d017765	WAT1-related protein At5g45370
Zm00001d004797	0	0	0	0	0	0	0	0	0	0	0	0	0			Zm00001d049476									-3.32193					-3.32193			Zm00001d019265	uncharacterized
Zm00001d004927	-3.3	2.6	1.4	-0.6	1.2	0.1	0.3	-1.9	-0.4	0.3	-1.9	0.1	0			Zm00001d049516	-1.73697						-3.32193	-3.32193				-3.32193	-3.32193	-15.0247			Zm00001d019274	pectinesterase inhibitor domain containing protein
Zm00001d040408	-1	0.1	0	-0.3	0.2	-0.2	-0.8	-0.1	-0.2	0.3	-0.3	0.3	-0.3			Zm00001d049776		-3.32193				-3.32193								-6.64386			Zm00001d019564
Zm00001d040506	0	0	0	0	0	0	0	0	0	0	0	0	0			Zm00001d050279		-3.32193	-1.32193			-1.73697								-6.38082			Zm00001d019570
Zm00001d041403	-0.7	0	-0.4	-0.2	-0.2	-0.2	0.1	-0.4	0.2	-0.5	0	-0.3	0.1			Zm00001d013170	-3.32193													-3.32193			Zm00001d023758	RING-H2 finger protein ATL67
Zm00001d041822	0	0	0	0	0	0	0	0	0	0	0	0	0			Zm00001d015588	-3.32193	-2.32193				-3.32193		-3.32193			-3.32193			-15.6096			Zm00001d024442
Zm00001d049476	0	0	0	0	0	0	0	0	0.1	0	0	0	0			Zm00001d015594		-2.32193			-3.32193	-2.32193								-7.96578			Zm00001d025651	Poly(A)-specific ribonuclease PARN
Zm00001d049516	-0.2	0	0	0	-0.1	0	0.1	0.1	0	0	-0.1	0.1	0.1			Zm00001d017532		-3.32193	-1		-1.73697		-1.73697						-2.32193	-10.1178			Zm00001d025685
Zm00001d049776	-0.1	0.1	0	0	0	0.1	0	0	-0.1	0	-0.1	-0.1	0			Zm00001d017748			-1.73697		-1		-1		-3.32193	-1.73697		-1.73697	-2.32193	-12.8548			Zm00001d025776	cell division control protein 48 homolog B
Zm00001d050270	0	0	0	0	0	0	0	0	0	0	0	0	0			Zm00001d017765	-0.321928	0.263034	-1.32193	-0.736966	-1.73697	-0.321928		-1.32193						-5.49861			Zm00001d025805
Zm00001d050279	0	0.1	0.4	0	-0.1	0.3	0	0	0	0	0	0	0			Zm00001d019265									-3.32193					-3.32193			Zm00001d040408	rab escort protein 1
Zm00001d013155	0	0	0	0	0	0	0	0	0	0	0	0	0			Zm00001d019274							-1.73697							-1.73697			Zm00001d041403	uncharacterized
Zm00001d013170	0	0	0	0	0	0	0	-0.1	0	-0.1	0	-0.1	0			Zm00001d019564		-3.32193		-3.32193		-2.32193		-2.32193				-3.32193		-14.6096			Zm00001d046407
Zm00001d013246	0	0	0	0	0	0	0	0	0	0	0	0	0			Zm00001d019570				-3.32193										-3.32193			Zm00001d046479
Zm00001d014110	0	0	0	0	0	0	0	0	0	0	0	0	0			Zm00001d008939	2.03562		-3.32193											-1.2863			Zm00001d049476	z1A2_3 alpha zein
Zm00001d014802	0	0	0	0	0	0	0	0	0	0	0	0	0			Zm00001d046407	-1	-3.32193		-3.32193				-3.32193		-3.32193	-3.32193			-17.6096			Zm00001d049516	zinc finger CCCH domain-containing protein 56-like
Zm00001d014846	0	0	0	0	0	0	0	0	0	0	0	0	0			Zm00001d046479		-2.32193				-3.32193		-3.32193						-8.96578			Zm00001d049776
Zm00001d015588	-0.1	0.2	0	0	0	0.1	-0.2	0.1	0	0	0.1	0	0			Zm00001d000004	-1.32193	-1.32193	-0.514573		-1							-2.32193		-6.48036			Zm00001d050279
Zm00001d015594	-0.2	0.2	0	-0.1	0.1	0.2	-0.1	-0.1	-0.4	0	-0.3	-0.1	-0.2
Zm00001d015717	0	0	0	0	0	0	0	0	0	0	0	0	0
Zm00001d017532	0	0.1	0.5	0	0.3	-0.1	0.3	-0.1	-0.1	0	0	0	0.2
Zm00001d017748	-0.3	-0.1	0.3	-0.2	0.5	0	0.5	0	0.1	0.3	-0.2	0.3	0.2
Zm00001d017765	-1.9	1.2	0.4	0.6	0.3	0.8	-0.8	0.4	-0.1	-0.1	-1.1	0	0
Zm00001d017838	0	0	0	0	0	0	0	0	0	0	0	0	0
Zm00001d019265	-0.1	0	-0.1	0	0	0	0	-0.1	0.1	-0.1	0	0	0
Zm00001d019274	0	0	0	0	0	0	0.3	-0.1	0	-0.1	0	-0.1	0
Zm00001d019564	-0.2	0.1	-0.2	0.1	-0.1	0.2	0	0.2	-0.1	0	-0.1	0.1	0
Zm00001d019570	0	0	0	0.1	0	0	0	0	0	0	0	0	0
Zm00001d008939	0	-0.1	0.1	-0.1	0	0	0	0	0	0	0	0	0
Zm00001d046407	-0.1	0.1	-0.1	0.1	0	0	-0.2	0.1	0	0.1	0.1	0	0
Zm00001d046479	-0.2	0.2	-0.2	0	-0.1	0.1	0	0.1	0	0	0	0	0
Zm00001d000004	-2.9	0.4	0.7	-0.2	0.5	-0.7	-3.2	-0.2	-2	-0.4	-1.8	0.2	-0.7
