# Supplementary material for: Comprehensive meta-analysis of QTL and gene expression studies identify candidate genes associated with Aspergillus flavus resistance in maize
Source: Front Plant Sci. 2023 Jul 18;14:1214907. doi: 10.3389/fpls.2023.1214907 (PMC10392829; doi:10.3389/fpls.2023.1214907)
Supplement: Supplementary file 12 [file Table_11.xlsx]

## Sheet: Sheet1
Table S11. Forteen unique A. flavus resistance ssociated candidate genes in MQTL intervals with no expression under any other stress
Gene ID		B73V5	B73V2	Annotations
Zm00001d030855	Expression in seed tissues (embryo/or endosperm) but not under stress - qTeller		AF546187.1_FG007	z1D_4 – alpha zein
Zm00001d003677			GRMZM2G147685	Opaque11 – Opaque endosperm 11
Zm00001d041822			GRMZM2G087413	LOC100286270 – uncharacterized LOC100286270
Zm00001d014110			GRMZM2G130580	LOC100216815 – uncharacterized LOC100216815
Zm00001d017838			AC208539.3_FG002	hypothetical protein ZEAMMB73_Zm00001d017838
Zm00001d025672	no expression data under other stresses	Zm00001eb424730	GRMZM2G003917	LOC103641751 – fasciclin-like arabinogalactan protein 7
Zm00001d004797		Zm00001eb092370	AC203257.2_FG003	hypothetical protein ZEAMMB73_Zm00001d004797
Zm00001d040506		Zm00001eb129350	AC211403.4_FG005	putative mediator of RNA polymerase II transcription subunit 26b [Zea mays]
Zm00001d050270			AC205615.4_FG002	Carboxylesterase SOBER1
Zm00001d013155			AC195340.3_FG005	hypothetical protein ZEAMMB73_Zm00001d013155
Zm00001d013246		Zm00001eb214570	GRMZM2G030821	UDP-glycosyltransferase 83A1
Zm00001d014802			AC207107.4_FG001	hypothetical protein ZEAMMB73_Zm00001d014802
Zm00001d014846		Zm00001eb228560	AC235548.1_FG002	hypothetical protein ZEAMMB73_Zm00001d014846
Zm00001d015717			AC212354.3_FG002	hypothetical protein ZEAMMB73_Zm00001d015717
