# Supplementary material for: Comprehensive meta-analysis of QTL and gene expression studies identify candidate genes associated with Aspergillus flavus resistance in maize
Source: Front Plant Sci. 2023 Jul 18;14:1214907. doi: 10.3389/fpls.2023.1214907 (PMC10392829; doi:10.3389/fpls.2023.1214907)
Supplement: Supplementary file 13 [file Table_12.xlsx]

## Sheet: Sheet1
Supplementary Table S12. Marker-trait associations identified from genome-wide association studies on Aspergillus flavus resistance in maize, genes in MQTL intervals within 10 Kb of GWAS SNPs and 15 genes from GWAS genes and MQTL genes that are physically close
Genome Wide Association Study for Drought, Aflatoxin Resistance, and Important Agronomic Traits of Maize Hybrids in the Sub-Tropics - Farfan et al 2015 - maize genome version AGPV2.				Genome-Wide Association Mapping of Aspergillus flavus and Aflatoxin Accumulation Resistance in Maize - Warburtun et al 2015 - B73 (V2)																									Genome-wide association study leads to novel genetic insights into resistance to Aspergillus flavus in maize kernels Han et al 2020 - B73 (V2)										Association mapping and pathway analysis of ear rot disease caused by Aspergillus flavus in a panel of tropical maize germplasm - Bertagna et al - 2021 B73 (V4)										Confirmation and Fine Mapping of a Major QTL for Aflatoxin Resistance in Maize Using a Combination of Linkage and Association Mapping -ZHANG et al 2016 - Version B73 2009 SEN et al
SNP	CHR	R2(%)		Trait*	Marker	Locus	Site	df	F	p	errordf	markerR2	Genetic Var	Residual Var	Alleles	# Res. All.	Allele Effect		Region	Environment	SNPs	BIN	F	p-value R2 Proximity† Gene					Marker	Chrom	Locus_pos	P value	R2(%)	Candidate Gene ID	Annotated in NR of NCBI	Expressed or not	Verified by expression GWAS		Location	SNP	Position	bin	Ra	MinorAllele	Effect	p	MAFb		Traits
CS11-WWa Aﬂatoxin (ng g−1)				Star09LSM	S1_220828080	1	220828080	1	20.3238	9.73945e-06	279	0.0715647	0.261406	0.67388	T/G	28	0.921391		1	Starkville2010	S1_272220177		23.12	2.78  10−06	0.099	Gene contains marker	GRMZM2G049349		chr1._262891312	1	262891312	8.05e-07	11	GRMZM2G113569	histone H3.v1	expressed	TRUE		Cambira	S3_11444429	11444429	3.03	0.076	T	0.69	1.57−6	0.0655		AA
S4_17376432	4	5.27		AveLSM	S1_227508825	1	227508825	1	24.2544	1.65242e-06	229	0.103293	0.103263	0.185842	G/C	25	0.773943			Starkville2010	S1_272220142	1.1	16.68	5.92  10−05	0.064	Gene contains linked SnP 55 kb away, LD > 0.3	GRMZM2G137891							GRMZM2G085116	Protein of unknown function, DUFS38	expressed	TRUE		Sabáudia	S5_192698173	192698173	5.05	0.092	G	0.83	5.04−7	0.0575		AA
S5_197707198	5	4.85		AveLSM	S1_238465590	1	238465590	1	20.9384	7.19613e-06	282	0.0715374	0.103263	0.185842	G/C	38	0.485938			Average	S1_272220177		16.01	8.55  10−05	0.066	Gene is 34 kb from marker and lies in LD window > 0.35	GRMZM2G061442							GRMZM2G024131	indole-3-acetate beta-glucosyltransferase	Not expressed			Sabáudia	S5_193181081	193181081	5.05	0.078	A	0.42	3.28−6	0.2114		AA
CS12-WWa Aﬂatoxin (ng g−1)				Star10LSM	S1_272220177	1	272220177	1	23.125	2.77849e-06	233	0.0993569	0.326167	0.576059	A/G	56	0.781776			Starkville2010	S1_272220852		15.73	9.50  10−05	0.058									GRMZM2G319150	Ferredoxin--NADP reductase, chloroplastic	Not expressed			Sabáudia	S7_172385750	172385750	7.05	0.081	G	0.45	1.95−6	0.2607		RAI13 score
S3_185272026	3	6.06		Star10LSM	S1_280578672	1	280578672	1	22.2824	3.72935e-06	287	0.0781569	0.326167	0.576059	C/G	25	0.958986			Starkville2010	S1_272272944		16.13	8.09  10−05	0.066	Gene is 2 kb from marker and lies in LD window > 0.36	GRMZM2G137891							GRMZM2G122018	germin-like protein 2 precursor	expressed			Sabáudia	S7_179922056	179922056	7.06	0.097	T	0.88	2.34−7	0.0686		RAI13 score
CS12-WWa Aﬂatoxin (ng g−1)				Star10LSM	S1_280581187	1	280581187	1	22.9615	2.84844e-06	256	0.0917834	0.326167	0.576059	C/A	27	0.941787			Starkville2010	S1_272272952		20.08	1.19  10−05	0.083	Gene is 15 kb from marker and lies in LD window > 0.3	GRMZM2G061442		chr1.S_262891333	1	262891333	8.05e-07	11	NA					Joint	S3_186841387	186841387	3.06	0.07	C	0.61	3.11−6	0.0712		RAI13 score
S4_17376432	4	5.69		Star10LSM	S1_280635905	1	280635905	1	25.0981	1.14285e-06	221	0.100729	0.326167	0.576059	A/T	34	0.932989			Starkville2010	S1_272273063		16.52	6.62  10−05	0.068				PZE-101214474	1	264954323	1.5e-06	11	GRMZM2G346263	opaque endosperm10	expressed			Joint	S7_179922056	179922056	7.06	0.078	T	0.65	9.84−7	0.0686		RAI13 score
RCBD Aﬂatoxin (ng g−1)				Star10LSM	S1_280635931	1	280635931	1	25.0981	1.14285e-06	221	0.100729	0.326167	0.576059	T/C	34	0.932989		2	Starkville2010	S1_280635905	1.1	25.1	1.14  10−06	0.101	Gene contains linked SnP 55 kb away, LD > 0.8	GRMZM2G009958							GRMZM2G044557	mitogen-activated protein kinase kinasekinase I-like isoform x1	expressed			Joint	S10_144453417	144453417	10.07	0.096	C	0.93	5.74−8	0.0712		RAI13 score
S5_197707198	5	4.98		Star10LSM	S1_280635934	1	280635934	1	25.0981	1.14285e-06	221	0.100729	0.326167	0.576059	T/A	34	0.932989			collStation2009	S1_280635905		15.98	8.83  10−05	0.072	Gene is 47 kb from marker and is outside LD window	GRMZM2G164580							GRMZM2G400092	histone acetyltransferase hat b	expressed	TRUE												RAI13 score
S4_17376432	4	4.79		Star10LSM	S1_280635950	1	280635950	1	25.0981	1.14285e-06	221	0.100729	0.326167	0.576059	C/G	34	0.932989			Starkville2010	S1_280635931		25.1	1.14  10−06	0.101	Gene is 45 kb from marker and lies in LD window > 0.67	GRMZM2G312239							GRMZM2G042133	DnaJ	expressed	TRUE												RAI13 score
				Star10LSM	S1_280635958	1	280635958	1	25.0981	1.14285e-06	221	0.100729	0.326167	0.576059	C/T	34	0.932989			collStation2009	S1_280635931		15.98	8.83  10−05	0.072	Gene contains linked SnP 56 kb away, LD > 0.7	GRMZM2G009944		chr1.S_264955840	1	264955840	1.1e-06	11	NA															RAI13 score
				AveLSM	S2_22947761	2	22947761	1	22.047	4.24482e-06	277	0.0761254	0.103263	0.185842	C/G	78	0.380981			Starkville2010	S1_280635934		25.1	1.14  10−06	0.101				chr2.S_26290253	2	26290253	1.56e-06	11	GRMZM2G127581	tubulin-specific chaperone B	expressed	TRUE												RAI13 score
				Star10LSM	S2_26723423	2	26723423	1	21.0658	9.7756e-06	148	0.128224	0.326167	0.576059	A/G	34	1.00344			collStation2009	S1_280635934		15.98	8.83  10−05	0.072									GRMZM2G127591	udp-galactose transporter I-like	expressed													RAI13 score
				AveLSM	S2_28672866	2	28672866	1	23.8598	1.88044e-06	251	0.088928	0.103263	0.185842	T/A	172	-0.406862			Starkville2010	S1_280635950		25.1	1.14  10−06	0.101									GRMZM2G428386	1-phosphatidylinositol-3-phosphate S-kinase FABID	expressed	TRUE												RAI14 score
				Star10LSM	S2_40498454	2	40498454	1	21.6485	5.15195e-06	276	0.0797422	0.326167	0.576059	C/T	74	0.700902			collStation2009	S1_280635950		15.98	8.83  10−05	0.072				chr2.S_26717856	2	26717856	9.83e-08	13	GRMZM2G113990	coiled-coil-helix-coiled-coil-helix, domain-containing protein 4	expressed													RAI14 score
				Star10LSM	S2_153128978	2	153128978	1	20.9816	8.52797e-06	192	0.110538	0.326167	0.576059	G/A	31	0.964018			Starkville2010	S1_280635958		25.1	1.14  10−06	0.101									GRMZM2G114149	Mitochondrial substrate carrier family protein	expressed	TRUE												RAI14 score
				StRa10LSM	S2_179654329	2	179654329	1	21.7271	4.93658e-06	279	0.0753474	0.288026	0.596448	C/T	25	0.990747			collStation2009	S1_280635958		15.98	8.83  10−05	0.072									GRMZM2G114153	gemelike protein	expressed	TRUE												RAI14 score
				Star10LSM	S2_183190432	2	183190432	1	23.269	3.79803e-06	141	0.138238	0.326167	0.576059	C/T	9	1.62846			Starkville2010	S1_280635967		19.52	1.61  10−05	0.08									GRMZM2G413887	gemelike protein	expressed	TRUE												RAI14 score
				Star10LSM	S2_185018841	2	185018841	1	22.2555	3.95067e-06	261	0.0804713	0.326167	0.576059	G/T	14	1.26273			collStation2009	S1_280635967		16.33	7.48  10−05	0.077									GRMZM2G474575	alpha-amylase/subtilisin inhibitor	Not expressed													RAI14 score
				Star10LSM	S2_185018849	2	185018849	1	22.2584	4.13688e-06	238	0.0847474	0.326167	0.576059	T/A	14	1.26668		3	Average	S2_22947761	2.03	22.05	4.24  10−06	0.076	Gene contains marker	GRMZM2G003784							GRMZM2G171410	mma cap guanine-n7 methyltransferase 2-like	expressed	TRUE												RAI14 score
				Star10LSM	S2_185018850	2	185018850	1	22.2507	4.13333e-06	240	0.083221	0.326167	0.576059	G/T	14	1.2663			Starkville2009	S2_22947761		18.15	2.82  10−05	0.063	Gene is 2.4 kb from marker but no nearby LD info	GRMZM2G003769		chr2.S_26718237	2	26718237	2.02e-08	14	NA															RAI14 score
				Star10LSM	S2_185018853	2	185018853	1	22.2507	4.13333e-06	240	0.083221	0.326167	0.576059	G/C	14	1.2663		4	Starkville2010	S2_153128978	2.06	20.98	8.53  10−06	0.111	Gene contains marker	GRMZM2G155437		chr8.S_ 165276011	8	165276011	1.06e-06	11	GRMZM2G43 1066	auxin-responsive protein SAURSO	expressed													RAI14 score
				Star10LSM	S2_185018854	2	185018854	1	22.2507	4.13333e-06	240	0.083221	0.326167	0.576059	G/A	14	1.2663			Average	S2_153128978		16.47	7.30  10−05	0.088									GRMZM2G129065	protein trichome berefringence-like 7	expressed													RAI14 score
				Star10LSM	S2_187449158	2	187449158	1	27.9584	2.83234e-07	243	0.121247	0.326167	0.576059	A/G	16	1.32236		5	Starkville2010	S2_183190432	2.06	23.27	3.80  10−06	0.138	Gene is 5 kb from marker and lies in LD window = 0.5	GRMZM2G037574							GRMZM2G002023	udp-glucuronate:xylan alpha-glucuronosyltransferase I-like	expressed													RAI14 score
				Star09LSM	S2_188872774	2	188872774	1	21.3522	6.08274e-06	262	0.075431	0.261406	0.67388	C/T	28	1.32432			Average	S2_183190432		16.22	9.45  10−05	0.116	Gene contains linked SnP 325.6 kb away, LD > 0.3	GRMZM2G019901							GRMZM2G092759	N-lysine methyltransferase setd6	expressed	TRUE												RAI14 score
				StRa10LSM	S2_197227440	2	197227440	1	20.5802	8.58679e-06	280	0.0725338	0.288026	0.596448	C/G	17	1.10698									Gene is 7 kb from marker but no nearby LD info	GRMZM2G057852							GRMZM2G393070	dirigent protein 8-like	expressed	TRUE
				Star10LSM	S2_205035222	2	205035222	1	23.2598	2.37625e-06	276	0.0811855	0.326167	0.576059	A/C	30	1.02467		6	Starkville2009	S2_188872774	2.07	21.35	6.08  10−06	0.075	Gene contains marker	GRMZM2G026065							GRMZM2G393072	dirigent protein 9-like	expressed	TRUE
				Lubb09LSM	S2_214614872	2	214614872	1	23.8492	1.86456e-06	257	0.0951388	0.185271	0.561837	T/C	76	0.631021			Starkville2010	S2_188872774		17.59	3.78  10−05	0.066									GRMZM2G092817	4,5-DOPA dioxygenase extradiol	expressed	TRUE
				Lubb09LSM	S2_227032507	2	227032507	1	21.0661	8.35614e-06	186	0.0958732	0.185271	0.561837	A/G	162	0.988196			Starkville2010	S2_188872782		17.59	3.78  10−05	0.066									GRMZM2G092945	amino acid permease 2	expressed	TRUE
				AveLSM	S3_24475219	3	24475219	1	24.94	1.05224e-06	283	0.0844497	0.103263	0.185842	C/G	66	0.474944			Average	S2_188872911		19.55	1.47  10−05	0.078									GRMZM2G096407	amino acid permease 8-like	expressed
				Star10LSM	S3_127577411	3	127577411	1	21.8892	4.84725e-06	246	0.0914502	0.326167	0.576059	A/G	45	0.829518			Lubbock2009	S2_188872911		17.14	4.76  10−05	0.067				chr9.S_131725983	9	131725983	1.67e-06	11	GRMZM2G309327	Caleium-binding protein CML42	expressed
				Star10LSM	S3_190456271	3	190456271	1	23.1282	2.51258e-06	280	0.0819805	0.326167	0.576059	C/T	18	1.28913		7	Starkville2010	S2_205035222	2.08	23.26	2.38  10−06	0.081	Gene contains marker	GRMZM2G166337							GRMZM2G108655	COP1-interacting protein 7	expressed	TRUE
				Star10LSM	S3_217358368	3	217358368	1	23.7274	1.84978e-06	291	0.0797102	0.326167	0.576059	A/T	25	1.04793			Average	S2_205035222		16.17	7.53  10−05	0.057				chr9.S_131726004	9	131726004	1.67e-06	11	NA
				Lubb09LSM	S3_217808302	3	217808302	1	20.7602	8.14483e-06	258	0.0811458	0.185271	0.561837	T/C	21	0.892269		8	Starkville2010	S3_127577411	3.05	21.89	4.85  10−06	0.092	Gene is 18 kb from marker but not in LD	GRMZM2G333619		chr9.S_131726006	9	131726006	1.67e-06	11	NA
				Lubb09LSM	S3_217808740	3	217808740	1	27.4193	3.71751e-07	236	0.112627	0.185271	0.561837	A/T	18	1.13357			Average	S3_127577411		16.43	6.84  10−05	0.063	Gene contains linked SnP 36 kb away, LD = 0.32	GRMZM2G160840
				Lubb09LSM	S3_217808747	3	217808747	1	27.3316	3.83309e-07	239	0.112081	0.185271	0.561837	T/C	18	1.13155		9	Starkville2010	S3_217358368	3.09	23.73	1.85  10−06	0.08	Gene contains marker	GRMZM2G089525
				Star10LSM	S3_217832603	3	217832603	1	21.5639	5.65045e-06	247	0.0808496	0.326167	0.576059	T/C	73	0.650591			Average	S3_217358368		19.78	1.25  10−05	0.067
				Star10LSM	S3_220680555	3	220680555	1	23.9009	2.27383e-06	184	0.108533	0.326167	0.576059	G/T	23	1.22241		10	Lubbock2009	S3_217808747	3.09	27.33	3.83  10−07	0.112	Gene contains marker	GRMZM2G052991
				Star10LSM	S3_220680559	3	220680559	1	23.9009	2.27383e-06	184	0.108533	0.326167	0.576059	G/T	23	1.22241			Starkville2010	S3_217808272		17.4	4.19  10−05	0.07	Gene contains linked SnP 12 kb away, LD > 0.46	GRMZM2G053047
				Star10LSM	S3_220680569	3	220680569	1	23.9009	2.27383e-06	184	0.108533	0.326167	0.576059	C/T	23	1.22241			Lubbock2009	S3_217808302		20.76	8.14  10−06	0.081
				StRa10LSM	S4_26653796	4	26653796	1	24.3117	1.52263e-06	250	0.0902223	0.288026	0.596448	C/G	17	1.22362			Lubbock2009	S3_217808740		27.42	3.72  10−07	0.113
				AveLSM	S5_20311281	5	20311281	1	22.4912	3.93818e-06	214	0.101298	0.103263	0.185842	A/T	21	0.659794			Average	S3_217808740		16.85	5.62  10−05	0.071	Gene is 2.6 kb from marker but no nearby LD info	GRMZM2G377609
				Star10LSM	S5_20311281	5	20311281	1	23.0414	3.04344e-06	214	0.108185	0.326167	0.576059	A/T	21	1.11922			Average	S3_217808747		16.71	6.00  10−05	0.07
				AveLSM	S5_185650835	5	185650835	1	23.3146	2.63182e-06	220	0.104864	0.103263	0.185842	C/T	13	1.02946		11	collStation2009	S3_217820604	3.09	15.67	9.66  10−05	0.054	Gene contains marker	GRMZM2G053047
				Star10LSM	S5_185650835	5	185650835	1	21.9634	4.96746e-06	220	0.101837	0.326167	0.576059	C/T	13	1.64317			Starkville2010	S3_217820604		15.63	9.84  10−05	0.055	Gene contains linked SnP 12 kb away, LD > 0.46	GRMZM2G052991
				Star10LSM	S5_206795116	5	206795116	1	21.7305	6.13362e-06	186	0.120797	0.326167	0.576059	G/T	17	1.19117		12	Starkville2010	S3_217832603	3.09	21.56	5.65  10−06	0.081	Gene contains marker	GRMZM2G053140
				Star10LSM	S5_206795119	5	206795119	1	22.9354	3.58308e-06	181	0.131312	0.326167	0.576059	C/G	12	1.39734			Average	S3_217832603		18.25	2.80  10−05	0.072	Gene contains linked SnP 44 kb away, LD > 0.3	GRMZM2G148532
				Star10LSM	S6_45924579	6	45924579	1	20.6359	8.63355e-06	259	0.0772002	0.326167	0.576059	G/C	54	0.705584			StarkvilleR2010	S3_217832603		16.05	8.25  10−05	0.063	Gene is 1.3 kb from marker but no nearby LD info	GRMZM2G053047
				Star10LSM	S6_74967491	6	74967491	1	23.1189	2.72615e-06	242	0.0946708	0.326167	0.576059	G/A	18	1.14819		13	Average	S4_26406913	4.04	16.74	5.63  10−05	0.056	Gene contains marker	GRMZM2G003814
				Star10LSM	S6_83834838	6	83834838	1	22.3005	4.20441e-06	223	0.0989561	0.326167	0.576059	T/A	22	1.11547									Gene is 6.3 kb from marker but no nearby LD info	GRMZM2G003642
				Star10LSM	S6_84051699	6	84051699	1	21.8402	4.65222e-06	282	0.0783555	0.326167	0.576059	G/C	16	1.20528		14	StarkvilleR2010	S4_26653796	4.04	24.31	1.52  10−06	0.09	Gene contains marker	GRMZM2G111261
				Star10LSM	S6_84051701	6	84051701	1	21.8402	4.65222e-06	282	0.0783555	0.326167	0.576059	C/A	16	1.20528									Gene is 1.7 kb from marker but not in LD	GRMZM2G111300
				Star10LSM	S6_84051705	6	84051705	1	21.8642	4.60591e-06	281	0.0784991	0.326167	0.576059	A/C	16	1.20596									Gene is 1.1 kb from marker and lies in LD window > 0.3	GRMZM2G111228
				Star10LSM	S6_84051707	6	84051707	1	21.8402	4.65222e-06	282	0.0783555	0.326167	0.576059	C/T	16	1.20528		15	Starkville2010	S5_20311281	5.03	23.04	3.04  10−06	0.108	Gene contains marker	GRMZM2G545615
				Star10LSM	S6_84051708	6	84051708	1	21.8402	4.65222e-06	282	0.0783555	0.326167	0.576059	T/A	16	1.20528			Average	S5_20311281		22.49	3.94  10−06	0.101
				Star10LSM	S6_84051709	6	84051709	1	21.8402	4.65222e-06	282	0.0783555	0.326167	0.576059	C/A	16	1.20528			Lubbock2009	S5_20311281		17.25	4.79  10−05	0.077
				Star10LSM	S6_106067070	6	106067070	1	21.6094	6.11203e-06	205	0.107836	0.326167	0.576059	G/C	34	0.928605		16	Average	S5_185650835	5.05	23.31	2.63  10−06	0.105	Gene is 5 kb from marker and in LD = 0.3	GRMZM2G028736
				AveLSM	S6_121311711	6	121311711	1	20.6825	8.25538e-06	273	0.0746612	0.103263	0.185842	C/T	36	0.506781			Starkville2010	S5_185650835		21.96	4.97  10−06	0.102	Gene is 4 kb from marker but no nearby LD info	GRMZM2G028830
				Star10LSM	S6_121371198	6	121371198	1	21.8469	4.68204e-06	276	0.0804047	0.326167	0.576059	G/T	33	0.916833		17	Starkville2010	S5_206795119	5.07	22.94	3.58  10−06	0.131	Gene contains marker	GRMZM2G105874
				Star10LSM	S7_2951719	7	2951719	1	22.0937	7.70385e-06	116	0.195674	0.326167	0.576059	C/G	31	1.12765			Starkville2010	S5_206795116		21.73	6.13  10−06	0.121	Gene contains linked SnP 45 kb away, LD > 0.31	GRMZM2G105844
				Star10LSM	S7_2951720	7	2951720	1	22.0937	7.70385e-06	116	0.195674	0.326167	0.576059	A/T	31	1.12765			Average	S5_206795116		18.12	3.35  10−05	0.087	Gene contains linked SnP 50.1 kb away, LD > 0.6	GRMZM2G162233
				StRa10LSM	S7_121184023	7	121184023	1	23.5137	2.08536e-06	281	0.0833042	0.288026	0.596448	A/G	230	-0.730746			StarkvilleR2010	S5_206795116		18.08	3.41  10−05	0.093	Gene contains linked SnP 160 kb away, LD = 0.3	GRMZM2G127632
				Star10LSM	S7_155754021	7	155754021	1	21.8944	7.08571e-06	139	0.154763	0.326167	0.576059	A/G	60	-0.910287			StarkvilleR2010	S5_206795119		18.92	2.32  10−05	0.099
				AveLSM	S8_94752242	8	94752242	1	20.3554	9.57757e-06	280	0.0709477	0.103263	0.185842	T/C	23	0.570409			Average	S5_206795119		17.55	4.46  10−05	0.088
				AveLSM	S8_94752243	8	94752243	1	20.3862	9.42188e-06	281	0.0710553	0.103263	0.185842	G/T	23	0.570315			Starkville2010	S5_206797714		18.66	2.42  10−05	0.081
				AveLSM	S8_94752246	8	94752246	1	21.0697	6.77264e-06	280	0.0740346	0.103263	0.185842	T/C	23	0.580443		18	Starkville2010	S6_74967491	6.01	23.12	2.73  10−06	0.095	Gene contains marker	GRMZM2G005499
				Star10LSM	S8_94752246	8	94752246	1	20.6371	8.35273e-06	280	0.0721404	0.326167	0.576059	T/C	23	0.980186			Average	S6_74967491		16.31	7.31  10−05	0.063	Gene is 48 kb from marker and lies in LD window > 0.37	Ac186592.3_FGT003
				AveLSM	S8_94752247	8	94752247	1	23.6255	1.99516e-06	276	0.0848667	0.103263	0.185842	A/C	18	0.674828			Starkville2010	S6_74967515		18.56	2.42  10−05	0.076
				Star10LSM	S8_94752247	8	94752247	1	25.3035	8.98386e-07	276	0.0890242	0.326167	0.576059	A/C	18	1.18327			Starkville2010	S6_74967516		18.56	2.42  10−05	0.076
				AveLSM	S8_94752251	8	94752251	1	23.3445	2.27353e-06	278	0.0831233	0.103263	0.185842	C/T	18	0.670643			Starkville2010	S6_74967517		18.56	2.42  10−05	0.076
				Star10LSM	S8_94752251	8	94752251	1	25.1037	9.83471e-07	278	0.0874912	0.326167	0.576059	C/T	18	1.17839			Starkville2010	S6_74967532		18.56	2.42  10−05	0.076
				AveLSM	S8_94752253	8	94752253	1	20.6143	8.42186e-06	282	0.0715328	0.103263	0.185842	T/C	23	0.574077		19	Starkville2010	S6_121311711	6.05	20.68	8.26  10−06	0.075	Gene contains marker	GRMZM5G841142
				Star10LSM	S8_94752257	8	94752257	1	25.1037	9.83471e-07	278	0.0874912	0.326167	0.576059	C/G	23	1.17839			Average	S6_121311711		19.82	1.25  10−05	0.073	Gene contains linked SnP 59.5 kb away, LD > 0.55	GRMZM2G136800
				AveLSM	S8_94752257	8	94752257	1	23.3445	2.27353e-06	278	0.0831233	0.103263	0.185842	C/G	18	1.17839			Starkville2009	S6_121311711		16.93	5.20  10−05	0.062	Gene is 19 kb from marker and lies in LD window > 0.55	Ac231604.1_FGT001
				StRa10LSM	S8_113504730	8	113504730	1	20.7453	8.56202e-06	235	0.0874908	0.288026	0.596448	C/A	16	1.19829									Gene contains linked SnP 95 kb away, LD = 0.3	GRMZM5G841142
				Star10LSM	S9_25712301	9	25712301	1	24.0757	1.68244e-06	255	0.0908242	0.326167	0.576059	A/C	39	0.911811									Gene is 58.7 kb from marker and lies in LD window = 0.3	GRMZM2G149700
				AveLSM	S9_51159051	9	51159051	1	21.1583	7.55677e-06	205	0.100351	0.103263	0.185842	T/C	42	0.517062		20	Starkville2010	S7_155754021	7.03	21.89	7.09  10−06	0.155	Gene is 8.6 kb from marker and lies in LD window > 0.5	GRMZM2G444075
				AveLSM	S9_51159063	9	51159063	1	21.328	6.97632e-06	205	0.100187	0.103263	0.185842	T/C	42	0.52099			Average	S7_155752575		19.66	1.52  10−05	0.094	Gene contains linked SnP 207 kb away, LD = 0.31	GRMZM2G173863
				AveLSM	S9_107333254	9	107333254	1	22.5237	3.46842e-06	262	0.0845024	0.103263	0.185842	A/G	59	0.413764			Average	S7_155752599		19.66	1.52  10−05	0.094
				Lubb09LSM	S9_107333254	9	107333254	1	21.8658	4.76149e-06	261	0.0852631	0.185271	0.561837	A/G	59	0.62899		21	Starkville2010	S8_94752247	8.02	25.3	8.98  10−07	0.089	Gene contains marker	GRMZM2G147221
				AveLSM	S9_117048726	9	117048726	1	43.1192	2.86937e-10	263	0.162031	0.103263	0.185842	G/A	31	0.786699			Average	S8_94752242		20.36	9.58  10−06	0.071	Gene contains linked SnP 118.7 kb away, LD > = 0.3	GRMZM2G083344
				Star09LSM	S9_117048726	9	117048726	1	22.9888	2.77764e-06	262	0.0875118	0.261406	0.67388	G/A	31	0.94894			Starkville2010	S8_94752242		19.72	1.30  10−05	0.069	Gene is 3.8 kb from marker but no nearby LD info	GRMZM2G147271
				Star10LSM	S9_117048726	9	117048726	1	38.4566	2.24389e-09	263	0.144159	0.326167	0.576059	G/A	31	1.24072			Average	S8_94752243		20.39	9.42  10−06	0.071
				AveLSM	S9_117048731	9	117048731	1	43.1192	2.86937e-10	263	0.162031	0.103263	0.185842	G/A	31	0.786699			Starkville2010	S8_94752243		19.98	1.15  10−05	0.069
				Star09LSM	S9_117048731	9	117048731	1	22.9888	2.77764e-06	262	0.0875118	0.261406	0.67388	C/T	31	0.94894			Average	S8_94752246		21.07	6.77  10−06	0.074
				Star10LSM	S9_117048731	9	117048731	1	38.4566	2.24389e-09	263	0.144159	0.326167	0.576059	C/T	31	1.24072			Starkville2010	S8_94752246		20.64	8.35  10−06	0.072
				Star10LSM	S9_130936459	9	130936459	1	21.6335	5.33251e-06	260	0.0856558	0.326167	0.576059	A/G	185	0.690907			Average	S8_94752247		23.63	2.00  10−06	0.085
				Star10LSM	S9_130936477	9	130936477	1	21.6302	5.35068e-06	259	0.0856422	0.326167	0.576059	G/A	184	0.691185			Average	S8_94752249		20.11	1.08  10−05	0.07
				CSta09LSM	S9_139985509	9	139985509	1	20.8463	7.50353e-06	284	0.0729226	0.199754	0.500126	G/A	33	0.656995			Starkville2010	S8_94752249		19.76	1.28  10−05	0.07
				Star10LSM	S9_142824142	9	142824142	1	25.1409	1.28106e-06	186	0.131261	0.326167	0.576059	T/A	68	0.769854			Starkville2010	S8_94752251		25.1	9.83  10−07	0.09
				Star10LSM	S10_3702951	10	3702951	1	21.1082	8.89807e-06	164	0.112026	0.326167	0.576059	C/A	110	-0.77295			Average	S8_94752251		23.34	2.27  10−06	0.083
				Star10LSM	S10_59660506	10	59660506	1	22.7628	2.94956e-06	289	0.0766281	0.326167	0.576059	T/C	23	1.02771			Average	S8_94752253		20.61	8.42  10−06	0.072
				StRa10LSM	S10_73160824	10	73160824	1	23.0328	2.67827e-06	270	0.0850174	0.288026	0.596448	A/G	53	0.745376			Starkville2010	S8_94752253		19.75	1.28  10−05	0.068
				StRa10LSM	S10_73160845	10	73160845	1	23.0046	2.71971e-06	269	0.0850958	0.288026	0.596448	T/C	53	0.744926			Average	S8_94752254		20.11	1.08  10−05	0.07
				Star10LSM	S10_91956547	10	91956547	1	28.0095	2.50114e-07	278	0.099474	0.326167	0.576059	G/T	28	1.0457			Starkville2010	S8_94752254		19.76	1.28  10−05	0.07
				Star09LSM	S10_95855766	10	95855766	1	23.8034	2.04104e-06	229	0.0950326	0.261406	0.67388	C/T	12	1.39023			Average	S8_94752255		20.11	1.08  10−05	0.07
				Star09LSM	S10_109718061	10	109718061	1	20.6006	8.85654e-06	254	0.0794477	0.261406	0.67388	C/T	50	0.709755			Starkville2010	S8_94752255		19.76	1.28  10−05	0.07
				AveLSM	S10_125923329	10	125923329	1	24.4352	1.34324e-06	281	0.0839372	0.103263	0.185842	C/G	17	0.740905			Starkville2010	S8_94752257		25.1	9.83  10−07	0.09
				StRa10LSM	S10_125923329	10	125923329	1	21.6262	5.16665e-06	281	0.078513	0.288026	0.596448	C/G	17	1.18657			Average	S8_94752257		23.34	2.27  10−06	0.09
				AveLSM	S10_127808418	10	127808418	1	20.5806	8.89668e-06	257	0.076025	0.103263	0.185842	A/C	168	-0.381302			Average	S8_94752258		20.11	1.08  10−05	0.07
				Star10LSM	S10_132526403	10	132526403	1	20.608	9.00206e-06	243	0.0785787	0.326167	0.576059	G/A	187	-1.06193			Starkville2010	S8_94752258		19.76	1.28  10−05	0.07
				Star10LSM	S10_139081513	10	139081513	1	24.0407	1.71443e-06	254	0.087037	0.326167	0.576059	C/G	211	0.919238			Average	S8_94752280		17.09	4.73  10−05	0.058
				Star10LSM	S10_139081517	10	139081517	1	24.0407	1.71443e-06	254	0.087037	0.326167	0.576059	G/C	211	0.919238		22	Average	S9_107333254	9.04	22.52	3.47  10−06	0.085	Gene is 1 kb from marker but no nearby LD info	GRMZM2G331766
				StRa10LSM	S10_139505158	10	139505158	1	21.3313	6.04238e-06	272	0.0816039	0.288026	0.596448	G/C	20	0.994244			Lubbock2009	S9_107333254		21.87	4.76  10−06	0.085
				StRa10LSM	S10_140743333	10	140743333	1	25.9835	1.07295e-06	151	0.170636	0.288026	0.596448	G/T	8	1.81044		23	Average	S9_117048726	9.04	43.12	2.87  10−10	0.162	Gene contains marker	GRMZM2G108619
				AveLSM	S10_143677433	10	143677433	1	23.3391	2.79972e-06	197	0.115486	0.103263	0.185842	C/T	24	0.632019			Starkville2010	S9_117048726		38.46	2.24  10−09	0.144	Gene is 6.3 kb from marker but not in LD	GRMZM2G409245
				Lubb09LSM	S10_144979480	10	144979480	1	22.7517	3.39934e-06	223	0.103486	0.185271	0.561837	G/C	53	-0.719595			Starkville2009	S9_117048726		22.99	2.78  10−06	0.088	Gene is 4 kb from marker but not in LD	GRMZM2G108668
																				Average	S9_117048731		43.12	2.87  10−10	0.162
																				Starkville2010	S9_117048731		38.46	2.24  10−09	0.144
																				Starkville2009	S9_117048731		22.99	2.78  10−06	0.088
																			24	Starkville2009	S10_95855766	10.04	23.8	2.04  10−06	0.095	Gene contains linked SnP 38 kb away, LD > 0.3	GRMZM2G407650
																				Average	S10_95855766		19.68	1.44  10−05	0.079
																			25	Starkville2009	S10_109718061	10.04	20.6	8.86  10−06	0.079	Gene contains marker	GRMZM2G159675
																				Average	S10_109718061		19.83	1.28  10−05	0.073	Gene contains linked SnP 4 kb away, LD > 0.4	GRMZM2G159720
																				Lubbock2009	S10_109718061		16.28	7.29  10−05	0.063	Gene contains linked SnP 13 kb away, LD > 0.3	GRMZM2G159732
																										Gene is 106 kb away ad lies in LD window > 0.38	GRMZM2G130351
																										Gene contains linked SnP 338.5 kb away, LD > 0.38	GRMZM2G126194
																			26	Average	S10_125923329	10.04	24.44	1.34  10−06	0.084	Gene contains marker	GRMZM2G058573
																				StarkvilleR2010	S10_125923329		21.63	5.17  10−06	0.079
																			27	Starkville2010	S10_139081513	10.06	24.04	1.71  10−06	0.087	Gene contains marker	GRMZM2G148467
																				Average	S10_139081513		16.95	5.23  10−05	0.064	Gene is 33.8 kb from marker and lies in LD window > 0.3	GRMZM2G124965
																				Starkville2010	S10_139081517		24.04	1.71  10−06	0.087	Gene is 4 kb from marker and lies in LD window > 0.3	GRMZM2G148475
																				Average	S10_139081517		16.95	5.23  10−05	0.064
[truncated: 10 more columns]
