# Supplementary material for: Comprehensive meta-analysis of QTL and gene expression studies identify candidate genes associated with Aspergillus flavus resistance in maize
Source: Front Plant Sci. 2023 Jul 18;14:1214907. doi: 10.3389/fpls.2023.1214907 (PMC10392829; doi:10.3389/fpls.2023.1214907)
Supplement: Supplementary file 14 [file Table_13.xlsx]

## Sheet: Sheet1
Supplementary Table S13. Twenty-nine genes (14 putative unique Aspergillus flavus response speicifc genes in MQTLs + 15 MQTL genes close to GWAS SNPs)					Annotation
				27 genes with expression available in Musungu et al. 2020			Expression in Musungu et al. 2020
29 genes		15 GWAS and MQTL	14 unique with no expression in other stresses			MQTL	S2	S3	S5	S6	S7	S8	S9	S10	S11	S12	S13	S14	S15	S16	S17	S18	B73 V5
Zm00001d000001	GRMZM5G851266	Zm00001d000001	Zm00001d030855	Zm00001d000001	polyphenol oxidase1	MQTL10.3	0.150079	-0.22426	0.089964	0.154768	0.000821	0.149364	0.064825	0.349081	0.038933	0.979739	0.305438	0.478865	-0.08095	0.187646	-0.45364	-0.93602	Zm00001eb413300
Zm00001d000004	GRMZM2G142565	Zm00001d000004	Zm00001d003677	Zm00001d000004	Cysteine-rich PDZ-binding protein	MQTL10.03	0.378109	0.812892	0.397655	0.963829	0.488178	0.661091	0.424804	0.866533	1.13907	0.600081	1.29877	1.43773	1.12009	0.805513	1.43193	1.46019	Zm00001eb413280
Zm00001d000016	GRMZM2G097509	Zm00001d000016	Zm00001d041822	Zm00001d000016	fatty acid desaturase5	MQTL10.3	0.576084	0.643761	0.838121	-0.14837	-0.03558	-0.26593	1.29912	1.13637	0.862372	-0.06053	-0.07613	0.171242	0.620784	-0.09206	-0.12555	0.07012	Zm00001eb413200
Zm00001d003378	GRMZM2G042443	Zm00001d003378	Zm00001d014110	Zm00001d003378	mediator of paramutation1	MQTL2.2	0.064132	-0.06594	-0.1833	-0.26841	0.021339	-0.06704	-0.05641	-0.17025	-0.26677	-0.00295	-0.22548	-0.58305	-0.93633	-1.023	-1.36135	-1.16216	Zm00001eb080370
Zm00001d003488	GRMZM5G870067	Zm00001d003488	Zm00001d017838	Zm00001d003488	UDP-glycosyltransferase 85A7	MQTL2.03	-1.41641	-0.73452	0.0228	-0.34523	-0.24647	0.469092	-0.39891	-1.23279	0.177244	-1.28167	-0.51981	0.42882	-0.9408	-1.35486	-1.63487	-1.16542	Zm00001eb081230
Zm00001d003677	GRMZM2G147685	Zm00001d017526	Zm00001d025672	Zm00001d003677	Opaque11 – Opaque endosperm 11	MQTL2.04	0.088866	-0.02275	0.116515	0.205559	-0.27233	-0.26216	-0.34956	-0.02229	-0.18131	0.198655	-0.19228	-0.69474	-1.24404	-1.86341	-2.41105	-2.95733
Zm00001d004797	AC203257.2_FG003	Zm00001d017532	Zm00001d004797	Zm00001d004797	hypothetical protein	MQTL2.04	0.637433	-0.29089	0.239557	-0.09311	-0.08743	-0.25309	-0.15838	0.530972	0.598866	-0.04057	1.89134	-0.20452	0.535692	-0.07465	-0.09048	0.284149	Zm00001eb092370
Zm00001d013155	AC195340.3_FG005	Zm00001d024442	Zm00001d040506	Zm00001d013155	hypothetical protein	MQTL4.04	0.271826	0.327116	-0.23009	-0.16035	-0.95742	-0.18455	-0.02671	-0.84358	-0.09236	-0.67114	-0.57663	-0.50371	-0.45477	0.033599	0.195169	0.151327
Zm00001d013246	GRMZM2G030821	Zm00001d024444	Zm00001d050270	Zm00001d013246	UDP-glycosyltransferase 83A1	MQTL5.01	-0.82079	-1.42439	-1.65774	-2.11721	-1.98809	-2.25375	-1.7996	-1.99462	-2.32386	-2.0392	-1.30959	-1.14326	-2.1425	-2.07339	-1.94774	-1.4973	Zm00001eb214570
Zm00001d014110	GRMZM2G130580	Zm00001d025626	Zm00001d013155	Zm00001d014110	uncharacterized	MQTL5.02	-0.1392	-0.28755	-0.34548	-0.20497	-0.31334	-0.26746	-0.34206	-0.04697	-0.27935	-0.14999	-0.828	-1.09299	-1.20893	-1.2151	-1.86438	-1.5084
Zm00001d014802	AC207107.4_FG001	Zm00001d025651	Zm00001d013246	Zm00001d014802	hypothetical protein	MQTL5.03	-0.05221	0.139045	-0.02223	1.03275	1.1704	0.280312	0.401391	0.340788	-0.44433	1.46599	0.777904	0.245828	1.43021	0.47701	0.454795	0.432844
Zm00001d014846	AC235548.1_FG002	Zm00001d025765	Zm00001d014802	Zm00001d014846	hypothetical protein	MQTL5.03	0.705604	0.206915	1.05183	1.09487	0.284125	0.917571	0.043642	1.16753	0.632438	1.07448	1.10018	0.374459	-0.65363	-1.13295	-1.57664	-1.3032	Zm00001eb228560
Zm00001d015717	AC212354.3_FG002	Zm00001d025776	Zm00001d014846	Zm00001d015717	hypothetical protein	MQTL5.04	-1.51906	-1.07895	-1.38293	-0.44297	-1.35059	-1.50167	1.05999	-1.23902	-1.32417	-1.28686	-1.29327	-1.47959	-1.38671	-0.50251	-1.34405	-0.59226
Zm00001d017526	AC209208.3_FG002	Zm00001d049374	Zm00001d015717	Zm00001d017532	putative RING-H2 finger protein ATL71	MQTL5.06	0.217207	0.347342	-0.30191	-0.10501	-0.10438	0.359767	0.378177	0.362637	0.154742	-0.04514	0.223844	1.76562	-0.13474	-0.07388	-0.09809	0.268236	Zm00001eb250010
Zm00001d017838	AC208539.3_FG002	Zm00001d049476		Zm00001d017838	hypothetical protein	MQTL5.06	0.022251	0.01804	-0.10443	-0.08489	0.013501	0.047214	-0.13419	0.37487	-0.30808	0.225043	-0.23478	-0.11316	-0.08831	-0.77959	-1.1396	-2.41893
Zm00001d024442	AC196202.3_FG007			Zm00001d024442	hypothetical protein	MQTL10.04	-0.05744	-0.46599	0.035958	0.679647	-0.45092	-0.61445	0.383402	-0.31706	-0.06595	-0.12231	0.287563	0.003737	-0.43141	-0.83617	-1.1891	-1.05682	Zm00001eb414860
Zm00001d024444	GRMZM2G107616			Zm00001d025626	aldehyde dehydrogenase26	MQTL10.06	-0.06346	-0.09992	-0.03649	-0.11126	-0.29487	-0.50528	-0.48459	-0.03909	0.289555	-0.77486	-0.6058	0.074555	0.364513	0.526957	0.664499	0.426402	Zm00001eb424410
Zm00001d025626	GRMZM2G135470			Zm00001d025651	Poly(A)-specific ribonuclease PARN	MQTL10.06	0.412164	0.611709	0.666841	0.327163	0.691791	0.506346	0.615426	0.584246	0.776355	0.989511	-0.12459	1.09365	0.760281	0.937621	1.28643	1.20056	Zm00001eb424550
Zm00001d025651	GRMZM2G301246			Zm00001d025672	fasciclin-like arabinogalactan protein 7	MQTL10.06	0.463251	0.614166	0.543872	1.22801	1.04049	1.13633	0.58085	1.95604	1.82383	2.56235	1.54971	2.28709	1.24209	0.524345	-0.68436	-0.73937	Zm00001eb424730
Zm00001d025672	GRMZM2G003917			Zm00001d025765	autophagy10	MQTL10.06	-0.01896	-0.38453	-0.26714	-0.13658	0.134504	0.198169	-0.03639	0.634521	0.225055	-0.22444	-0.11283	-0.14757	-0.50671	-0.84045	-0.65444	-0.87617	Zm00001eb425740
Zm00001d025765	GRMZM2G066059			Zm00001d025776	Cell division control protein 48 homolog B	MQTL10.06	0.314008	0.403129	0.395517	-0.31856	0.078363	0.155434	-0.14215	-0.16948	0.313253	-0.01742	0.382151	0.832318	0.805684	0.39045	1.03589	0.739843	Zm00001eb425850
Zm00001d025776	GRMZM2G149994			Zm00001d030855	z1D_4 – alpha zein	MQTL1.10	0.087022	-0.11717	0.406773	0.292358	-0.32235	0.271843	0.044329	0.265429	0.363553	0.238005	0.875008	0.889425	0.796617	0.070456	0.538666	-0.12531
Zm00001d030855	AF546187.1_FG007			Zm00001d040506	mediator of RNA polymerase II transcription subunit 26b	MQTL3.01	-0.20584	-0.21625	-0.05834	1.73761	-0.0494	-0.23378	0.369619	0.036328	-0.24666	-0.02682	-0.01678	0.09047	-0.10713	0.28016	-0.06605	0.023149	Zm00001eb129350
Zm00001d040506	GRMZM2G018782			Zm00001d041822	uncharacterized	MQTL3.06	-0.01855	0.113362	0.103628	-0.19377	-0.41936	-0.33966	-1.08992	-0.88832	-0.23229	-0.12662	-1.31641	-1.10149	-1.63076	-2.39091	-1.27157	-3.44867
Zm00001d041822	GRMZM2G087413			Zm00001d049374	DUF295 domain-containing protein	MQTL4.1	-0.06986	-0.19019	-0.50544	0.523555	-0.54244	-0.2477	0.766908	-0.44797	-1.37655	0.392365	-0.75219	0.832869	0.634325	-0.543	-0.88062	-0.44036	Zm00001eb171130
Zm00001d049374	GRMZM2G111261			Zm00001d049476	alpha zein 19kDa A-1	MQTL4.01	0.932697	0.661038	0.871484	1.19842	0.494157	1.24022	0.674305	1.14307	1.21726	0.89525	1.18248	0.992478	0.412102	0.492415	0.476589	0.155628	Zm00001eb171970
Zm00001d050270	AC205615.4_FG002			Zm00001d050270	Carboxylesterase SOBER1	MQTL4.04	0.516945	0.517723	0.156078	0.521781	0.340624	-0.74643	1.02308	0.841581	0.202541	-0.19183	0.004511	0.970794	-0.00497	0.112017	0.681252	-0.18229
Zm00001d049476	GRMZM2G026939
Zm00001d017532	GRMZM2G428438
