# Supplementary material for: Comprehensive meta-analysis of QTL and gene expression studies identify candidate genes associated with Aspergillus flavus resistance in maize
Source: Front Plant Sci. 2023 Jul 18;14:1214907. doi: 10.3389/fpls.2023.1214907 (PMC10392829; doi:10.3389/fpls.2023.1214907)
Supplement: Supplementary file 15 [file Table_14.xlsx]

## Sheet: Sheet1
Table S14. Primers used for validation of MQTLs
Meta-QTL	Position (cM)	Physical position start	Physical position end	Closest SSR marker	Primer sequence forward	Primer sequence reverse		Approximate amplicon size (bp)
MQTL2.1	20.65	13707326	18150443	umc1542	TAAAGCTATGATGGCACTTGCAGA	CATATTTGCCTTTGCCCTTTTGTA		160
MQTL2.2	51.67	38746143	40967702	bnlg2277	TTACGGTACCAATTCGCTCC	GACGACGCCATTTTCTGATT		220
MQTL2.4	68.32	50602169	54798447	umc1555	ATAAAACGAACGACTCTCTCACCG	ATATGTCTGACGAGCTTCGACACC		100
MQTL4.1	35.45	25512455	28858623	umc1757	ATAGGAGGTGAGGTGAGGAGGAAG	TTTTCTGCAGGGATAACATTTGTG		160
MQTL5.6	216	189380404	204393016	umc1792	CATGGGACAGCAAGAGACACAG	ACCTTCATCACCTGCAACTACGAC		130
MQTL8.2	48.73	37909921	41494784	umc1817	CTACGCAGGCTTCAACCACC	GTACTGGTGATGATGGTACCCCTG		130
MQTL9.1	60.19	49430724	53039338	umc1634	TCCGTTGAGGACACTCGAATTTAT	GTAGCCTGCAAAACATCCAAGAAC		110
MQTL10.3	71.23	56441322	60888763	umc1077	CAGCCACAGTGAGGCACATC	CAGAGACTCTCCATTATCCCTCCA		180
MQTL10.4	87.96	71377312	73510436	umc1898	ACGAGCAGCAGTCTCTTGGG	ACATGGGGCACAAGAAGCAAT		230
MQTL10.6	152.21	121431613	129288759	umc1038	CGTCACACTCCTCTGCCACTT	GAGGATTCAGAACTCGACTCGG		180
